# Supplementary material for: Identification and comparative analysis of hepatitis C virus–host cell protein interactions
Source: Royal Society of Chemistry journal article supplement (doi:10.1039/c3mb70343f), 2013-10-08
Supplement: c3mb70343f.xlsx [file c3mb70343f.xlsx]

## Sheet: Summary of SI Tables
SI Table	Title
SI Table 1	List of primers used to clone HCV genes and gene fragments
SI Table 2	HCV genotype 2a-human protein-protein interactions with gene fragment identified in the yeast two-hybrid assay
SI Table 3	Overlap of the HCV GT 2a-human protein interaction network with other large-scale HCV-host interaction studies. (Corresponds to Fig. 2.)
SI Table 4	Results of DAVID enrichment analysis of the HCV GT 2a-human protein interaction network. (Corresponds to Fig. 4)
SI Table 5A	Cellular proteins that bind to proteins from multiple HCV genotypes. (Corresponds to Fig. 6A.)
SI Table 5B	Complete results of DAVID enrichment analysis of human proteins that bound to HCV genotypes 1a, 1b, and 2a
SI Table 5C	Comparison of the enriched terms associated with the HCV genotypes 1a-, 1b-, and 2a-human interactomes. (Corresponds to Figs. 6B and C)
SI Table 6A	DAVID enrichment analysis for the unique and shared targets of HCV Genotype 2a (Dolan et al) and DENV (Khadka et al). (Corresponds to Fig. 7B)
SI Table 6B	DAVID enrichment analysis of all cellular targets of HCV Genotype 2a (Dolan et al) and DENV (Khadka et al). (Corresponds to Fig. 7C)
SI Table 6C	Comparison of enriched terms associated with the cellular targets of HCV Genotype 2a (Dolan et al) and DENV (Khadka et al). (Corresponds to Fig. 7C)

## Sheet: SI Table 1
SI Table 1. List of primers used to clone HCV genes and gene fragments. Underlined sequences indicate recombination tails for cloning into yeast two-hybrid vectors.
gene	fragment	aa start	aa end	aa length	forward primer sequence	reverse primer sequence
Core	FL	1	173	173	CCAAACCCAAAAAAAGAGATC ATGAGCACAAATCCTAAACCTCA	GTTTTTCAGTATCTACGATTCA AGGGGAAACCGGGTAGGTTCCCT
Core	1	1	76	76	CCAAACCCAAAAAAAGAGATC ATGAGCACAAATCCTAAACCTCAA	GTTTTTCAGTATCTACGATTCA CCAGGCCTTGCCAGTGGA
Core	2	40	117	78	CCAAACCCAAAAAAAGAGATC AGGGGCCCCAGGTTGGGTGT	GTTTTTCAGTATCTACGATTCA GCGCGACCTATGCCGGGGGT
E1	1	1	161	161	CCAAACCCAAAAAAAGAGATC ATGGCCCAGGTGAAGAATACCAGT	GTTTTTCAGTATCTACGATTCA GTGAGCCCCGCTAACGATGTCT
E2	1	1	234	234	CCAAACCCAAAAAAAGAGATC ATGGGCACCACCACCGTTGGAGGC	GTTTTTCAGTATCTACGATTCA GTAAGGGTAGTGGACCAGGCACT
E2	2	264	338	75	CCAAACCCAAAAAAAGAGATC ATGGCATGCAACTTCACTCGTGGGGA	GTTTTTCAGTATCTACGATTCA CTCCCATCGAACGACGTATTTTG
NS2	1	100	217	118	CCAAACCCAAAAAAAGAGATC ATGCATGTGCCGTACTTCGTCAGA	GTTTTTCAGTATCTACGATTCA AAGGAGCTTCCACCCCTTGGA
NS3	FL	1	631	631	CCAAACCCAAAAAAAGAGATC ATGGCTCCCATCACTGCTTATGCCCA	GTTTTTCAGTATCTACGATTCA GGTCATGACCTCAAGGTCAGCT
NS3	1	1	200	200	CCAAACCCAAAAAAAGAGATC ATGGCTCCCATCACTGCTTATGCCCA	GTTTTTCAGTATCTACGATTCA CCCGACCTGATAGGTCTGGGGCA
NS3	2	135	631	497	CCAAACCCAAAAAAAGAGATC ATGTTGAAGGGGTCCTCGGGG	GTTTTTCAGTATCTACGATTCA GGTCATGACCTCAAGGTCAGCT
NS4B	1	198	261	64	CCAAACCCAAAAAAAGAGATC ATGGGGGAGGGCGCGGTCCAATG	GTTTTTCAGTATCTACGATTCA GCATGGGATGGGGCAGTC
NS5A	FL	1	466	466	CCAAACCCAAAAAAAGAGATC ATGTTCATCTCTTGTCAAAAGGGGT	GTTTTTCAGTATCTACGATTCA GCAGCACACGGTGGTATCGTCCT
NS5A	1	36	213	178	CCAAACCCAAAAAAAGAGATC ATGTTCATCTCTTGTCAAAAGGGGT	GTTTTTCAGTATCTACGATTCA AGTCTCCGCCGTGATGTGGG
NS5A	2	209	342	134	CCAAACCCAAAAAAAGAGATC ATGATCACGGCGGAGACTGCGG	GTTTTTCAGTATCTACGATTCA TGGTGGGAGAGCACAACCA
NS5A	3	209	368	160	CCAAACCCAAAAAAAGAGATC ATGATCACGGCGGAGACTGCGG	GTTTTTCAGTATCTACGATTCA GAGGGCTTCTGATATGGTGCT
NS5A	4	356	466	111	CCAAACCCAAAAAAAGAGATC ATGACAGTGGGTCTGAGCGAGAG	GTTTTTCAGTATCTACGATTCA GCAGCACACGGTGGTATCGTCCT
NS5B	FL	1	570	570	CCAAACCCAAAAAAAGAGATC ATGTCCATGTCATACTCCTGGACC	GTTTTTCAGTATCTACGATTCA GCGGGGTCGGGCGCGCGACAC
NS5B	1	1	400	400	CCAAACCCAAAAAAAGAGATC ATGTCCATGTCATACTCCTGGACC	GTTTTTCAGTATCTACGATTCA AACTGTTTCCCAGGCAGCCC
NS5B	2	367	531	165	CCAAACCCAAAAAAAGAGATC ATGTCCTCAAATGTGTCTGTGGCGT	GTTTTTCAGTATCTACGATTCA CTTCACCGCCCAATTGAAGA
NS5B	3	532	570	39	CCAAACCCAAAAAAAGAGATC ATGACCAAGCTCAAACTCACTCCA	GTTTTTCAGTATCTACGATTCA GCGGGGTCGGGCGCGCGACAC

## Sheet: SI Table 2
SI Table 2. HCV genotype 2a-human protein-protein interactions with gene fragment identified in the yeast two-hybrid assay
HCV Bait Fragment	Prey Gene Symbol	Prey Refseq	Prey Gene	prey start	prey end	insert size
HCV-CORE-2	APOB	NM_000384.2	Homo sapiens apolipoprotein B (including Ag(x) antigen) (APOB), mRNA	12974	13653	679
HCV-CORE-1	DDX3X	NM_001356.3	Homo sapiens DEAD (Asp-Glu-Ala-Asp) box polypeptide 3, X-linked (DDX3X), mRNA	2250	2754	504
HCV-CORE-2	EIF3L	NM_016091.2	Homo sapiens eukaryotic translation initiation factor 3, subunit L (EIF3L), mRNA	448	982	534
HCV-CORE-2	GLRX5	NM_016417.2	Homo sapiens glutaredoxin 5 (GLRX5), mRNA	228	568	340
HCV-CORE-1	NPM1	NM_001037738.1	Homo sapiens nucleophosmin (nucleolar phosphoprotein B23, numatrin) (NPM1), transcript variant 3, mRNA	531	864	333
HCV-CORE-2	NPM1	NM_001037738.1	Homo sapiens nucleophosmin (nucleolar phosphoprotein B23, numatrin) (NPM1), transcript variant 3, mRNA	531	864	333
HCV-CORE-2	RILPL2	NM_145058.1	Homo sapiens Rab interacting lysosomal protein-like 2 (RILPL2), mRNA	258	888	630
HCV-CORE-1	TRIP11	NM_004239.2	Homo sapiens thyroid hormone receptor interactor 11 (TRIP11), mRNA	4975	5648	673
HCV-E2-2	APOH	NM_000042	Homo sapiens apolipoprotein H (beta-2-glycoprotein I) (APOH), mRNA	379	874	495
HCV-E2-2	CIC	NM_015125	Homo sapiens capicuaHomolog (Drosophila) (CIC), mRNA	107	166	59
HCV-E2-2	SMC1A	NM_006306	Homo sapiens structural maintenance of chromosomes 1A (SMC1A), mRNA	548	900	352
HCV-E2-2	TCF7L2	NM_030756	Homo sapiens transcription factor 7-like 2 (T-cell specific, HMG-box) (TCF7L2), mRNA	409	686	277
HCV-E2	APOH	NM_000042	Homo sapiens apolipoprotein H (beta-2-glycoprotein I) (APOH), mRNA	379	874	495
HCV-E2	ATXN2L	NM_007245	Homo sapiens ataxin 2-like (ATXN2L), transcript variant A, mRNA	2525	3054	529
HCV-E2	CFH	NM_000186	Homo sapiens complement factor H (CFH), transcript variant 1, mRNA	949	1333	384
HCV-E2	GREB1	NM_014668	Homo sapiens GREB1 protein (GREB1), transcript variant a, mRNA	7209	7483	274
HCV-E2	HRG	NM_000412	Homo sapiens histidine-rich glycoprotein (HRG), mRNA	845	1500	655
HCV-E2	N4BP2L2	NM_014887	Homo sapiens NEDD4 binding protein 2-like 2 (N4BP2L2), transcript variant 2, mRNA	835	1291	456
HCV-E2	NID1	NM_002508	Homo sapiens nidogen 1 (NID1), mRNA	2579	2821	242
HCV-E2	RILPL2	NM_145058	Homo sapiens Rab interacting lysosomal protein-like 2 (RILPL2), mRNA	258	888	630
HCV-E2	TRIM62	NM_018207	Homo sapiens tripartite motif-containing 62 (TRIM62), mRNA	609	1066	457
HCV-NS2	APOA1	NM_000039	Homo sapiens apolipoprotein A-I (APOA1), mRNA	422	815	393
HCV-NS2	APOA5	NM_052968	Homo sapiens apolipoprotein A-V (APOA5), mRNA	451	832	381
HCV-NS2	C3	NM_000064	Homo sapiens complement component 3 (C3), mRNA	1889	2328	439
HCV-NS2	C4A	NM_007293	Homo sapiens complement component 4A (Rodgers blood group) (C4A), mRNA	3076	3818	742
HCV-NS2	CCDC88C	NM_001080414	Homo sapiens coiled-coil domain containing 88C (CCDC88C), mRNA	3549	4081	532
HCV-NS2	COPS2	NM_004236	Homo sapiens COP9 constitutive photomorphogenicHomolog subunit 2 (Arabidopsis) (COPS2), mRNA	29	424	395
HCV-NS2	GATC	NM_176818	Homo sapiens glutamyl-tRNA(Gln) amidotransferase, subunit CHomolog (bacterial) (GATC), mRNA	1	406	405
HCV-NS2	GATM	NM_001482	Homo sapiens glycine amidinotransferase (L-arginine:glycine amidinotransferase) (GATM), nuclear gene encoding mitochondrial protein, mRNA	275	665	390
HCV-NS2	IQGAP2	NM_006633	Homo sapiens IQ motif containing GTPase activating protein 2 (IQGAP2), mRNA	1040	1443	403
HCV-NS2	LOC100133511	XM_001719463	PREDICTED: Homo sapiens complement C3-like (LOC100133511), partial mRNA	1920	2349	429
HCV-NS2	PAIP1	NM_006451	Homo sapiens poly(A) binding protein interacting protein 1 (PAIP1), transcript variant 1, mRNA	1052	1565	513
HCV-NS2	PMS2P11	NR_023383	Homo sapiens postmeiotic segregation increased 2 pseudogene 11 (PMS2P11), non-coding RNA	717	954	237
HCV-NS2	SPG7	NM_003119	Homo sapiens spastic paraplegia 7 (pure and complicated autosomal recessive) (SPG7), nuclear gene encoding mitochondrial protein, transcript variant 1, mRNA	479	856	377
HCV-NS2	STX8	NM_004853	Homo sapiens syntaxin 8 (STX8), mRNA	180	576	396
HCV-NS2	TNFRSF10B	NM_003842	Homo sapiens tumor necrosis factor receptor superfamily, member 10b (TNFRSF10B), transcript variant 1, mRNA	1069	1529	460
HCV-NS3-3'	ADAR	NM_001025107	Homo sapiens adenosine deaminase, RNA-specific (ADAR), transcript variant 4, mRNA	1250	2001	751
HCV-NS3-3'	AGGF1	NM_018046	Homo sapiens angiogenic factor with G patch and FHA domains 1 (AGGF1), mRNA	819	1608	789
HCV-NS3-3'	CCDC66	NM_001012506	Homo sapiens coiled-coil domain containing 66 (CCDC66), mRNA	825	1439	614
HCV-NS3-3'	CEP63	NM_001042384	Homo sapiens centrosomal protein 63kDa (CEP63), transcript variant 4, mRNA	351	998	647
HCV-NS3-3'	FAM123B	NM_152424	Homo sapiens family with sequence similarity 123B (FAM123B), mRNA	776	1410	634
HCV-NS3-3'	FGB	NM_005141	Homo sapiens fibrinogen beta chain (FGB), mRNA	106	949	843
HCV-NS3-3'	GATAD2A	NM_017660	Homo sapiens GATA zinc finger domain containing 2A (GATAD2A), mRNA	137	826	689
HCV-NS3-3'	ITSN2	NM_006277	Homo sapiens intersectin 2 (ITSN2), transcript variant 1, mRNA	1333	1733	400
HCV-NS3-3'	MST1	NM_020998	Homo sapiens macrophage stimulating 1 (hepatocyte growth factor-like) (MST1), mRNA	1087	1563	476
HCV-NS3-3'	MYH14	NM_001077186	Homo sapiens myosin, heavy chain 14 (MYH14), transcript variant 1, mRNA	5317	5887	570
HCV-NS3-3'	OPTN	NM_001008212	Homo sapiens optineurin (OPTN), transcript variant 3, mRNA	1074	1724	650
HCV-NS3-3'	PCNT	NM_006031	Homo sapiens pericentrin (PCNT), mRNA	2575	3178	603
HCV-NS3-3'	PDIA6	NM_005742	Homo sapiens protein disulfide isomerase family A, member 6 (PDIA6), mRNA	189	770	581
HCV-NS3-3'	PHF14	NM_001007157	Homo sapiens PHD finger protein 14 (PHF14), transcript variant 1, mRNA	2542	3180	638
HCV-NS3-3'	SCP2	NM_002979	Homo sapiens sterol carrier protein 2 (SCP2), transcript variant 1, mRNA	149	521	372
HCV-NS3-3'	SDCCAG8	NM_006642	Homo sapiens serologically defined colon cancer antigen 8 (SDCCAG8), mRNA	1939	2277	338
HCV-NS3-3'	SLMAP	NM_007159	Homo sapiens sarcolemma associated protein (SLMAP), mRNA	1567	2194	627
HCV-NS3-3'	TF	NM_001063	Homo sapiens transferrin (TF), mRNA	1749	1811	62
HCV-NS3-3'	TPM4	NM_003290	Homo sapiens tropomyosin 4 (TPM4), mRNA	242	698	456
HCV-NS3-3'	TSG101	NM_006292	Homo sapiens tumor susceptibility gene 101 (TSG101), mRNA	535	1132	597
HCV-NS3-3'	ZNF195	NM_007152	Homo sapiens zinc finger protein 195 (ZNF195), mRNA	648	1259	611
HCV-NS3-3'	ZNF638	NM_001014972	Homo sapiens zinc finger protein 638 (ZNF638), transcript variant 2, mRNA	5421	6125	704
HCV-NS3-5'	EHMT2	NM_025256	Homo sapiens euchromatic histone-lysine N-methyltransferase 2 (EHMT2), transcript variant NG36/G9a-SPI, mRNA	1920	2566	646
HCV-NS3-5'	FBXO3	NM_012175	Homo sapiens F-box protein 3 (FBXO3), transcript variant 1, mRNA	853	1330	477
HCV-NS3-5'	MYCBP2	NM_015057	Homo sapiens MYC binding protein 2 (MYCBP2), mRNA	2058	2588	530
HCV-NS3-5'	RNASET2	NM_003730	Homo sapiens ribonuclease T2 (RNASET2), mRNA	871	1174	303
HCV-NS3-5'	SERPIND1	NM_000185	Homo sapiens serpin peptidase inhibitor, clade D (heparin cofactor), member 1 (SERPIND1), mRNA	122	589	467
HCV-NS3-5'	TCF7L2	NM_030756	Homo sapiens transcription factor 7-like 2 (T-cell specific, HMG-box) (TCF7L2), mRNA	408	686	278
HCV-NS3-5'	TF	NM_001063	Homo sapiens transferrin (TF), mRNA	1749	1995	246
HCV-NS3-5'	TSG101	NM_006292	Homo sapiens tumor susceptibility gene 101 (TSG101), mRNA	535	1132	597
HCV-NS3-FL	ADAR	NM_001111	Homo sapiens adenosine deaminase, RNA-specific (ADAR), transcript variant 1, mRNA	1332	1778	446
HCV-NS3-FL	AGGF1	NM_018046	Homo sapiens angiogenic factor with G patch and FHA domains 1 (AGGF1), mRNA	819	1608	789
HCV-NS3-FL	CCDC66	NM_001012506	Homo sapiens coiled-coil domain containing 66 (CCDC66), mRNA	825	1439	614
HCV-NS3-FL	EHMT2	NM_025256	Homo sapiens euchromatic histone-lysine N-methyltransferase 2 (EHMT2), transcript variant NG36/G9a-SPI, mRNA	1920	2566	646
HCV-NS3-FL	FBXO3	NM_012175	Homo sapiens F-box protein 3 (FBXO3), transcript variant 1, mRNA	853	1330	477
HCV-NS3-FL	GATAD2A	NM_017660	Homo sapiens GATA zinc finger domain containing 2A (GATAD2A), mRNA	137	826	689
HCV-NS3-FL	HSPA8	NM_006597	Homo sapiens heat shock 70kDa protein 8 (HSPA8), transcript variant 1, mRNA	886	1656	770
HCV-NS3-FL	ITSN2	NM_006277	Homo sapiens intersectin 2 (ITSN2), transcript variant 1, mRNA	1333	1733	400
HCV-NS3-FL	OPTN	NM_001008212	Homo sapiens optineurin (OPTN), transcript variant 3, mRNA	1074	1781	707
HCV-NS3-FL	RNASET2	NM_003730	Homo sapiens ribonuclease T2 (RNASET2), mRNA	871	1174	303
HCV-NS3-FL	SERPIND1	NM_000185	Homo sapiens serpin peptidase inhibitor, clade D (heparin cofactor), member 1 (SERPIND1), mRNA	122	589	467
HCV-NS3-FL	SESTD1	NM_178123	Homo sapiens SEC14 and spectrin domains 1 (SESTD1), mRNA	474	895	421
HCV-NS3-FL	TF	NM_001063	Homo sapiens transferrin (TF), mRNA	1749	1995	246
HCV-NS4B	C3	NM_000064	Homo sapiens complement component 3 (C3), mRNA	1889	2328	439
HCV-NS4B	DDX24	NM_020414	Homo sapiens DEAD (Asp-Glu-Ala-Asp) box polypeptide 24 (DDX24), mRNA	200	746	546
HCV-NS4B	SNX14	NM_020468	Homo sapiens sorting nexin 14 (SNX14), transcript variant 2, mRNA	1093	1512	419
HCV-NS5A-1	ANKRD50	NM_020337	Homo sapiens ankyrin repeat domain 50 (ANKRD50), mRNA	1903	2063	160
HCV-NS5A-1	CEP63	NM_001042384	Homo sapiens centrosomal protein 63kDa (CEP63), transcript variant 4, mRNA	389	750	361
HCV-NS5A-1	COPS3	NM_003653	Homo sapiens COP9 constitutive photomorphogenicHomolog subunit 3 (Arabidopsis) (COPS3), mRNA	94	625	531
HCV-NS5A-1	DDX5	NM_004396	Homo sapiens DEAD (Asp-Glu-Ala-Asp) box polypeptide 5 (DDX5), mRNA	1517	1942	425
HCV-NS5A-1	EHMT2	NM_025256	Homo sapiens euchromatic histone-lysine N-methyltransferase 2 (EHMT2), transcript variant NG36/G9a-SPI, mRNA	1920	2549	629
HCV-NS5A-1	EIF4G2	NM_001042559	Homo sapiens eukaryotic translation initiation factor 4 gamma, 2 (EIF4G2), transcript variant 2, mRNA	741	995	254
HCV-NS5A-1	FGB	NM_005141	Homo sapiens fibrinogen beta chain (FGB), mRNA	106	949	843
HCV-NS5A-1	GOLGA2	NM_004486	Homo sapiens golgi autoantigen, golgin subfamily a, 2 (GOLGA2), mRNA	1000	1881	881
HCV-NS5A-1	GORASP2	NM_015530	Homo sapiens golgi reassembly stacking protein 2, 55kDa (GORASP2), mRNA	95	563	468
HCV-NS5A-1	HMGCR	NM_000859	Homo sapiens 3-hydroxy-3-methylglutaryl-Coenzyme A reductase (HMGCR), mRNA	1673	2336	663
HCV-NS5A-1	MPHOSPH9	NM_022782	Homo sapiens M-phase phosphoprotein 9 (MPHOSPH9), mRNA	1187	1761	574
HCV-NS5A-1	PCM1	NM_006197	Homo sapiens pericentriolar material 1 (PCM1), mRNA	4943	5650	707
HCV-NS5A-1	PIK3R1	NM_181523	Homo sapiens phosphoinositide-3-kinase, regulatory subunit 1 (alpha) (PIK3R1), transcript variant 1, mRNA	180	990	810
HCV-NS5A-1	RBM10	NM_152856	Homo sapiens RNA binding motif protein 10 (RBM10), transcript variant 2, mRNA	826	1543	717
HCV-NS5A-1	SPG7	NM_003119	Homo sapiens spastic paraplegia 7 (pure and complicated autosomal recessive) (SPG7), nuclear gene encoding mitochondrial protein, transcript variant 1, mRNA	479	859	380
HCV-NS5A-1	SPTAN1	NM_003127	Homo sapiens spectrin, alpha, non-erythrocytic 1 (alpha-fodrin) (SPTAN1), mRNA	1360	2053	693
HCV-NS5A-1	SRFBP1	NM_152546	Homo sapiens serum response factor binding protein 1 (SRFBP1), mRNA	336	786	450
HCV-NS5A-1	TSG101	NM_006292	Homo sapiens tumor susceptibility gene 101 (TSG101), mRNA	535	1132	597
HCV-NS5A-2	CBX5	NM_012117	Homo sapiens chromoboxHomolog 5 (HP1 alphaHomolog, Drosophila) (CBX5), mRNA	1	359	358
HCV-NS5A-2	DDX5	NM_004396	Homo sapiens DEAD (Asp-Glu-Ala-Asp) box polypeptide 5 (DDX5), mRNA	1517	1942	425
HCV-NS5A-2	EIF4G2	NM_001042559	Homo sapiens eukaryotic translation initiation factor 4 gamma, 2 (EIF4G2), transcript variant 2, mRNA	741	995	254
HCV-NS5A-2	ELAVL1	NM_001419	Homo sapiens ELAV (embryonic lethal, abnormal vision, Drosophila)-like 1 (Hu antigen R) (ELAVL1), mRNA	683	1121	438
HCV-NS5A-2	FAM123B	NM_152424	Homo sapiens family with sequence similarity 123B (FAM123B), mRNA	776	1410	634
HCV-NS5A-2	FGB	NM_005141	Homo sapiens fibrinogen beta chain (FGB), mRNA	466	1076	610
HCV-NS5A-2	FN1	NM_212475	Homo sapiens fibronectin 1 (FN1), transcript variant 2, mRNA	4062	4328	266
HCV-NS5A-2	IFT88	NM_175605	Homo sapiens intraflagellar transport 88Homolog (Chlamydomonas) (IFT88), transcript variant 1, mRNA	1641	2130	489
HCV-NS5A-2	SRFBP1	NM_152546	Homo sapiens serum response factor binding protein 1 (SRFBP1), mRNA	210	634	424
HCV-NS5A-4	APOE	NM_000041	Homo sapiens apolipoprotein E (APOE), mRNA	49	512	463
HCV-NS5A-4	TSG101	NM_006292	Homo sapiens tumor susceptibility gene 101 (TSG101), mRNA	535	1132	597
HCV-NS5B-1	CALCOCO2	NM_005831	Homo sapiens calcium binding and coiled-coil domain 2 (CALCOCO2), mRNA	399	1145	746
HCV-NS5B-1	CTNNB1	NM_001098210	Homo sapiens catenin (cadherin-associated protein), beta 1, 88kDa (CTNNB1), mRNA	1789	1858	69
HCV-NS5B-1	CUL7	NM_014780	Homo sapiens cullin 7 (CUL7), mRNA	1036	1174	138
HCV-NS5B-1	DST	NM_015548	Homo sapiens dystonin (DST), transcript variant 1eA, mRNA	13305	14062	757
HCV-NS5B-1	FN1	NM_212476	Homo sapiens fibronectin 1 (FN1), transcript variant 5, mRNA	6371	6970	599
HCV-NS5B-1	GOLGA2	NM_004486	Homo sapiens golgi autoantigen, golgin subfamily a, 2 (GOLGA2), mRNA	1304	1952	648
HCV-NS5B-1	GORASP2	NM_015530	Homo sapiens golgi reassembly stacking protein 2, 55kDa (GORASP2), mRNA	95	563	468
HCV-NS5B-1	HSPA8	NM_006597	Homo sapiens heat shock 70kDa protein 8 (HSPA8), transcript variant 1, mRNA	1074	1622	548
HCV-NS5B-1	MYCBP2	NM_015057	Homo sapiens MYC binding protein 2 (MYCBP2), mRNA	2089	2762	673
HCV-NS5B-1	WBP11	NM_016312	Homo sapiens WW domain binding protein 11 (WBP11), mRNA	563	1291	728
HCV-NS5B-2	GPR81	NM_032554	Homo sapiens G protein-coupled receptor 81 (GPR81), mRNA	1619	1736	117
HCV-NS5B-2	KTN1	NM_182926	Homo sapiens kinectin 1 (kinesin receptor) (KTN1), transcript variant 1, mRNA	2543	3184	641
HCV-NS5B-2	NUCB1	NM_006184	Homo sapiens nucleobindin 1 (NUCB1), mRNA	764	1298	534
HCV-NS5B-2	NUCB2	NM_005013	Homo sapiens nucleobindin 2 (NUCB2), mRNA	1067	1499	432
HCV-NS5B-2	ROCK1	NM_005406	Homo sapiens Rho-associated, coiled-coil containing protein kinase 1 (ROCK1), mRNA	3242	3875	633
HCV-NS5B-2	SMC1A	NM_006306	Homo sapiens structural maintenance of chromosomes 1A (SMC1A), mRNA	548	900	352
HCV-NS5B-3	EIF4G2	NM_001042559	Homo sapiens eukaryotic translation initiation factor 4 gamma, 2 (EIF4G2), transcript variant 2, mRNA	741	995	254
HCV-NS5B-3	FGB	NM_005141	Homo sapiens fibrinogen beta chain (FGB), mRNA	106	949	843
HCV-NS5B-3	RLF	NM_012421	Homo sapiens rearranged L-myc fusion (RLF), mRNA	34	790	756
HCV-NS5B-3	TSG101	NM_006292	Homo sapiens tumor susceptibility gene 101 (TSG101), mRNA	535	1132	597
HCV-NS5B-3	UTRN	NM_007124	Homo sapiens utrophin (UTRN), mRNA	1049	1799	750
HCV-NS5B-FL	RLF	NM_012421	Homo sapiens rearranged L-myc fusion (RLF), mRNA	34	790	756
HCV-NS5B-FL	ROCK1	NM_005406	Homo sapiens Rho-associated, coiled-coil containing protein kinase 1 (ROCK1), mRNA	3552	3804	252

## Sheet: SI Table 3
SI Table 3. Overlap of the HCV GT 2a-human protein interaction network with other large-scale HCV-host interaction studies. (Corresponds to Fig. 2.)
	Fig 1A	Fig 1B			Fig 1C		Fig 1D			Fig 1E					Fig 5
Nonredundant list of HCV-H1 LaCount	Overlap Counts	Tripathi membrane Y2H (1)	Dechassey Y2H (2)	Dechassey Literature curated (2)	HCV RNAi (3-6)	HCV RNAi Source	Woodhouse HCV proteomics (8)	Diamond HCV proteomics (7)	Diamond HCV Bottlenecks (7)	Walters HCV microarray (9)	Blackham HCV microarray (10)	Ciccaglione HCV microarray (11)	Woodhouse HCV microarray (8)	Woodhouse HCV RNA seq (8)	Khadka DENV Y2H (13)
ADAR	0
AGGF1	0														AGGF1
ANKRD50	0														ANKRD50
APOA1	5	APOA1		APOA1				APOA1		APOA1			APOA1	APOA1	APOA1
APOA5	1													APOA5
APOB	2	APOB						APOB							APOB
APOE	1			APOE
APOH	1									APOH
ATXN2L	2							ATXN2L		ATXN2L
C3	0
C4A	0														C4A
CALCOCO2	1		CALCOCO2												CALCOCO2
CBX5	1							CBX5
CCDC66	1		CCDC66												CCDC66
CCDC88C	0														CCDC88C
CEP63	1		CEP63
CFH	1									CFH
CIC	0
COPS2	0														COPS2
COPS3	0
CTNNB1	1							CTNNB1							CTNNB1
CUL7	0														CUL7
DDX24	0														DDX24
DDX3X	2		DDX3X		DDX3X	(4)									DDX3X
DDX5	1			DDX5											DDX5
DST	0														DST
EHMT2	0
EIF3L	0
EIF4G2	0														EIF4G2
ELAVL1	2				ELAVL1	(4)		ELAVL1
FAM123B	0														FAM123B
FBXO3	0
FGB	0														FGB
FN1	2		FN1						FN1						FN1
GATAD2A	0
GATC	0
GATM	2									GATM			GATM
GLRX5	0
GOLGA2	1		GOLGA2												GOLGA2
GORASP2	0
GPR81	0
GREB1	0
HMGCR	1										HMGCR
HRG	0
HSPA8	2						HSPA8		HSPA8
IFT88	0
IQGAP2	0
ITSN2	0
KTN1	1							KTN1							KTN1
LOC100133511	0
MPHOSPH9	0
MST1	1												MST1
MYCBP2	0														MYCBP2
MYH14	0														MYH14
N4BP2L2	0
NID1	1		NID1												NID1
NPM1	2			NPM1				NPM1
NUCB1	4	NUCB1	NUCB1					NUCB1	NUCB1
NUCB2	0
OPTN	3									OPTN		OPTN	OPTN
PAIP1	1										PAIP1				PAIP1
PCM1	2				PCM1	(5)					PCM1				PCM1
PCNT	0														PCNT
PDIA6	1	PDIA6
PHF14	0
PIK3R1	0			PI3KR1
PMS2P11	0
RBM10	0
RILPL2	0														RILPL2
RLF	0
RNASET2	0														RNASET2
ROCK1	0
SCP2	1							SCP2
SDCCAG8	1		SDCCAG8												SDCCAG8
SERPIND1	0														SERPIND1
SESTD1	2		SESTD1										SESTD1
SLMAP	0
SMC1A	1										SMC1A
SNX14	0
SPG7	0														SPG7
SPTAN1	1													SPTAN1	SPTAN1
SRFBP1	1				SRFBP1	(4)									SRFBP1
STX8	0
TCF7L2	0														TCF7L2
TF	3			TF				TF		TF
TNFRSF10B	1				TNFRSF10B	(3)									TNFRSF10B
TPM4	4				TPM4	(4)	TPM4	TPM4						TPM4
TRIM62	2				TRIM62	(6)								TRIM62	TRIM62
TRIP11	1		TRIP11												TRIP11
TSG101	0
UTRN	0
WBP11	0
ZNF195	0
ZNF638	0
total	40
REFERENCES: 1. Tripathi LP, Kataoka C, Taguwa S, Moriishi K, Mori Y, et al. (2010) Network based analysis of hepatitis C virus Core and NS4B protein interactions. Molecular BioSystems 6: 2539-2553. 2. de Chassey B, Navratil V, Tafforeau L, Hiet MS, Aublin-Gex A, et al. (2008) Hepatitis C virus infection protein network. Molecular Systems Biology 4. 3. Vaillancourt FH, Pilote L, Cartier M, Lippens…

## Sheet: SI Table 4
SI Table 4. Results of DAVID enrichment analysis of the HCV GT 2a-human protein interaction network. (Corresponds to Fig. 4)
Category	Term	Benjamini	Genes
BLOCKS	IPB002017:Spectrin repeat	0.0171891	SESTD1, UTRN, DST, SPTAN1
COG NAME	COG1196: Smc; Chromosome segregation ATPases	0.0131469	SDCCAG8, CCDC88C, UTRN, ITSN2, TRIP11, DST
COG ONTOLOGY	Cell division and chromosome partitioning	0.00146117	SDCCAG8, CCDC88C, UTRN, ITSN2, TRIP11, DST, PIK3R1
GO Cellular Component	GO:0034361~very-low-density lipoprotein particle	0.00126848	APOB, APOA1, APOE, APOA5, APOH
	GO:0034385~triglyceride-rich lipoprotein particle	0.00126848	APOB, APOA1, APOE, APOA5, APOH
	GO:0032994~protein-lipid complex	0.00426461	APOB, APOA1, APOE, APOA5, APOH
	GO:0034358~plasma lipoprotein particle	0.00426461	APOB, APOA1, APOE, APOA5, APOH
	GO:0042627~chylomicron	0.00520361	APOB, APOE, APOA5, APOH
	GO:0005815~microtubule organizing center	0.00756307	SDCCAG8, ROCK1, PCNT, SLMAP, NPM1, PCM1, CEP63, IFT88, CTNNB1
	GO:0034364~high-density lipoprotein particle	0.0170536	APOA1, APOE, APOA5, APOH
	GO:0005813~centrosome	0.0175238	SDCCAG8, ROCK1, PCNT, SLMAP, NPM1, PCM1, CEP63, CTNNB1
	GO:0005615~extracellular space	0.0231547	TF, C4A, C3, NUCB1, APOB, LOC100133511, APOA1, APOE, FGB, NUCB2, APOA5, CFH, APOH, FN1
	GO:0015630~microtubule cytoskeleton	0.0389241	SDCCAG8, ROCK1, PCNT, SLMAP, NPM1, PCM1, CEP63, DST, IFT88, CTNNB1, MYCBP2
	GO:0044421~extracellular region part	0.0420598	TF, C4A, C3, NID1, NUCB1, APOB, APOA1, LOC100133511, APOE, FGB, APOA5, NUCB2, CFH, APOH, DST, FN1
	GO:0005793~ER-Golgi intermediate compartment	0.0437247	NUCB1, NUCB2, PDIA6, FN1
	GO:0005856~cytoskeleton	0.0481792	SDCCAG8, ROCK1, PCNT, UTRN, IQGAP2, CALCOCO2, CEP63, PCM1, TPM4, CTNNB1, MYCBP2, SLMAP, NPM1, MYH14, TRIP11, IFT88, DST, SPTAN1
	GO:0016607~nuclear speck	0.0487488	DDX3X, NPM1, GATAD2A, WBP11, ZNF638
GO Molecular Function	GO:0008201~heparin binding	0.00446382	APOB, APOE, APOA5, APOH, HRG, SERPIND1, FN1
	GO:0070325~lipoprotein receptor binding	0.00776142	APOB, APOA1, APOE, APOA5
	GO:0005539~glycosaminoglycan binding	0.00833474	APOB, APOE, APOA5, APOH, HRG, SERPIND1, FN1
	GO:0001871~pattern binding	0.0105324	APOB, APOE, APOA5, APOH, HRG, SERPIND1, FN1
	GO:0030247~polysaccharide binding	0.0105324	APOB, APOE, APOA5, APOH, HRG, SERPIND1, FN1
	GO:0005543~phospholipid binding	0.0177943	APOB, APOA1, SNX14, APOE, APOA5, APOH, PIK3R1
INTERPRO	IPR013326:Apolipoprotein/apolipophorin	0.031922	APOA1, APOE, APOA5
	IPR000074:Apolipoprotein A1/A4/E	0.031922	APOA1, APOE, APOA5
PANTHER_FAMILY	PTHR18976~APOLIPOPROTEIN	0.0109932	APOA1, APOE, APOA5
PANTHER_MF_ALL	MF00088:Apolipoprotein	0.000517081	APOB, APOA1, APOE, APOA5, APOH
PFAM	PF01442:Apolipoprotein A1/A4/E domain	0.0356049	APOA1, APOE, APOA5
	PF01442:Apolipoprotein	0.0356049	APOA1, APOE, APOA5
Keywords	plasma	4.37736e-09	TF, APOB, LOC100133511, APOA1, C4A, C3, APOE, FGB, MST1, APOH, SERPIND1, FN1
	phosphoprotein	1.17923e-07	COPS2, TSG101, COPS3, UTRN, PDIA6, IQGAP2, ZNF638, ITSN2, CBX5, CTNNB1, N4BP2L2, APOB, APOA1, CUL7, APOE, SLMAP, ANKRD50, DDX24, APOA5, RBM10, GOLGA2, GATM, ROCK1, CCDC88C, KTN1, OPTN, PCM1, FAM123B, NUCB1, EIF4G2, NUCB2, DST, TF, C3, WBP11, CIC, TCF7L2, TPM4, MYCBP2, ATXN2L, LOC100133511, CCDC66, AGGF1, DDX3X, GORASP2, NPM1, GATAD2A, TRIP11, HSPA8, PIK3R1, FN1, PCNT, ELAVL1, DDX5, EHMT2, RLF, MP…
	coiled coil	4.22424e-07	SDCCAG8, STX8, TSG101, CALCOCO2, WBP11, ITSN2, TPM4, N4BP2L2, CCDC66, RILPL2, AGGF1, FGB, SLMAP, APOA5, GATAD2A, TRIP11, GOLGA2, ROCK1, CCDC88C, PCNT, KTN1, OPTN, CEP63, PCM1, TRIM62, NUCB1, MPHOSPH9, SRFBP1, MYH14, SMC1A, DST
	polymorphism	0.000203679	SPG7, TSG101, GREB1, HMGCR, GPR81, UTRN, IQGAP2, PDIA6, ZNF638, ITSN2, CTNNB1, N4BP2L2, APOB, APOA1, CUL7, APOE, APOA5, DDX24, APOH, CFH, RBM10, GOLGA2, ROCK1, GATM, C4A, CCDC88C, KTN1, OPTN, PCM1, FAM123B, NUCB1, EIF4G2, TNFRSF10B, NUCB2, DST, IFT88, GATC, TF, SDCCAG8, GLRX5, C3, MST1, CALCOCO2, CIC, TCF7L2, TPM4, MYCBP2, LOC100133511, CCDC66, DDX3X, AGGF1, FGB, GORASP2, RNASET2, GATAD2A, EIF3L,…
	heparin-binding	0.000515749	APOB, APOE, APOH, HRG, SERPIND1, FN1
	cytoplasm	0.00051589	COPS2, SDCCAG8, TSG101, COPS3, UTRN, CALCOCO2, WBP11, ITSN2, TPM4, CTNNB1, RILPL2, CUL7, DDX3X, AGGF1, SLMAP, EIF3L, TRIP11, HSPA8, GATM, ROCK1, PAIP1, PCNT, ELAVL1, OPTN, CEP63, PCM1, FAM123B, NUCB1, SRFBP1, NUCB2, SCP2, DST, SPTAN1, ADAR
	chylomicron	0.000519037	APOB, APOE, APOA5, APOH
	vldl	0.000603444	APOB, APOE, APOA5, APOH
	cytoskeleton	0.000987241	SDCCAG8, ROCK1, PCNT, UTRN, CALCOCO2, CEP63, PCM1, TPM4, CTNNB1, SLMAP, DST, TRIP11, SPTAN1
	disease mutation	0.00106098	TF, SPG7, C4A, C3, OPTN, CTNNB1, FAM123B, APOB, APOA1, LOC100133511, CUL7, AGGF1, APOE, FGB, APOA5, CFH, SERPIND1, MYH14, SMC1A, PIK3R1, ADAR, FN1
	acetylation	0.00114467	TSG101, COPS3, IQGAP2, WBP11, TPM4, MYCBP2, APOB, ATXN2L, DDX3X, AGGF1, SLMAP, NPM1, DDX24, EIF3L, RBM10, PIK3R1, HSPA8, ROCK1, GATM, EHMT2, DDX5, PCM1, EIF4G2, ZNF195, MYH14, SMC1A, SCP2, SPTAN1
	hdl	0.00146117	APOA1, APOE, APOA5, APOH
	lipid binding	0.00146117	APOB, APOA1, APOE, APOH
	lipid transport	0.0035984	APOB, APOA1, APOE, APOA5, SCP2
	alternative splicing	0.00504498	COPS2, SPG7, GREB1, TSG101, HMGCR, PDIA6, IQGAP2, ZNF638, ITSN2, CTNNB1, N4BP2L2, SLMAP, CFH, RBM10, GOLGA2, GATM, CCDC88C, KTN1, OPTN, PCM1, FAM123B, EIF4G2, TNFRSF10B, ZNF195, NUCB2, IFT88, DST, SDCCAG8, SNX14, TCF7L2, TPM4, MYCBP2, ATXN2L, CCDC66, AGGF1, RNASET2, GORASP2, NPM1, GATAD2A, FBXO3, PIK3R1, HSPA8, FN1, PAIP1, NID1, EHMT2, CEP63, MPHOSPH9, PHF14, MYH14, SCP2, SPTAN1, ADAR
	isopeptide bond	0.010927	CUL7, SNX14, NPM1, KTN1, DST, TCF7L2, FN1, ADAR
	atherosclerosis	0.0114293	APOB, APOA1, APOE
	sulfation	0.017308	C4A, NID1, SERPIND1, FN1
	ubl conjugation	0.0225292	CUL7, SNX14, TSG101, NPM1, KTN1, DST, TCF7L2, PIK3R1, CTNNB1, ADAR

## Sheet: SI Table 5A
SI Table 5A. Cellular proteins that bind to proteins from multiple HCV genotypes. (Corresponds to Fig. 6A.)
1a and 1b	1b and 2a	1a and 2a	All
APOA2	APOE	APOA1	(NONE)
BIN1	CALCOCO2	APOB
CD209	CCDC66	DDX3X
CD81	CEP63	NPM1
CREB3	DDX5
EEF1A1	FN1
HIST3H2BB	GOLGA2
HIST4H4	NID1
HNRNPK	NUCB1
JAK1	PIK3R1
KPNA1	SDCCAG8
LTF	SESTD1
PSME3	TF
STAT3	TRIP11
TBP
TP53
TRAF2
UBQLN1
VAPA

## Sheet: SI Table 5B
SI Table 5B. Complete results of DAVID enrichment analysis of human proteins that bound to HCV genotypes 1a, 1b, and 2a
Genotype 1A	Category	Term	Benjamini	Genes
1A	BIOCARTA	h_ceramidePathway:Ceramide_Signaling_Pathway	0.0494641	TRAF2, BAX, CASP8, RAF1, FADD, TRADD
	EC_NUMBER	2.7.10.2	3.33596e-06	LYN, FYN, HCK, LCK, JAK1, CSK, SRC
	GO Biological Process	GO:0065003~macromolecular_complex_assembly	2.19687e-09	TRAF2, HIST4H4, RSF1, DICER1, SNRPD1, PML, TBP, CALR, SRC, APOB, FGG, APOA2, APOA1, PRMT5, CASP8, NPM1, FAS, HIST3H2BB, HSP90AA1, CCNH, TP53, SMAD3, FADD, BAX, IPO5, EIF2AK3
		GO:0043933~macromolecular_complex_subunit_organization	2.63741e-09	TRAF2, HIST4H4, RSF1, DICER1, SNRPD1, PML, TBP, CALR, SRC, APOB, FGG, APOA2, APOA1, PRMT5, CASP8, NPM1, SCARB1, FAS, HIST3H2BB, HSP90AA1, CCNH, TP53, SMAD3, FADD, BAX, IPO5, EIF2AK3
		GO:0012501~programmed_cell_death	4.34679e-07	TRAF2, FKBP8, LTBR, MCL1, CIDEB, TP53, PML, SMAD3, RAF1, FADD, STAT1, TP73, TRADD, RTN3, BAX, LCK, TICAM1, CASP8, PSME3, FAS, EIF2AK2, EIF2AK3
		GO:0006915~apoptosis	4.43301e-07	TRAF2, FKBP8, LTBR, MCL1, CIDEB, TP53, PML, SMAD3, RAF1, FADD, STAT1, TP73, TRADD, RTN3, BAX, LCK, TICAM1, CASP8, PSME3, FAS, EIF2AK2, EIF2AK3
		GO:0016265~death	9.17678e-07	TRAF2, FKBP8, LTBR, MCL1, CIDEB, TP53, PML, SMAD3, RAF1, FADD, TBP, STAT1, TP73, TRADD, RTN3, BAX, LCK, TICAM1, CASP8, PSME3, FAS, EIF2AK2, EIF2AK3
		GO:0010033~response_to_organic_substance	9.91792e-07	PPARA, RBP4, HSP90AA1, MCL1, LYN, RXRA, DICER1, PML, SMAD3, STAT1, SRC, STAT3, APOA2, APOB, MYD88, FYN, TICAM1, CASP8, IRF3, SCARB1, FAS, EIF2AK2, EIF2AK3
		GO:0008219~cell_death	1.13074e-06	TRAF2, FKBP8, LTBR, MCL1, CIDEB, TP53, PML, SMAD3, RAF1, FADD, TBP, STAT1, TP73, TRADD, RTN3, BAX, LCK, TICAM1, CASP8, PSME3, FAS, EIF2AK2, EIF2AK3
		GO:0007242~intracellular_signaling_cascade	3.87275e-06	TRAF2, FKBP8, HIST4H4, TBK1, PTPLAD1, PML, CALR, SRC, APOA1, TICAM1, CSK, LYN, PIK3CB, RXRA, CIDEB, TP53, RAF1, STAT1, TP73, STAT3, CLEC4M, FYN, CD209, CD81, RAB5A, JAK1, IRF3, ERC1, EIF2AK3
		GO:0042981~regulation_of_apoptosis	4.31441e-06	TRAF2, MCL1, RXRA, CIDEB, TP53, PML, SMAD3, FADD, CALR, STAT1, TP73, SRC, TRADD, MYD88, BAX, LCK, TICAM1, CASP8, NPM1, PSME3, FAS, HSPA5, EIF2AK3
		GO:0016310~phosphorylation	4.38355e-06	LYN, PIK3CB, TBK1, PTPLAD1, HCK, PKN2, PML, RAF1, STAT1, CDK2, SRC, NDUFV3, IKBKE, COX3, FYN, COX2, LCK, CD81, JAK1, CSK, EIF2AK2, ERC1, EIF2AK3
		GO:0010941~regulation_of_cell_death	4.58489e-06	TRAF2, MCL1, RXRA, CIDEB, TP53, PML, SMAD3, FADD, CALR, STAT1, TP73, SRC, TRADD, MYD88, BAX, LCK, TICAM1, CASP8, NPM1, PSME3, FAS, HSPA5, EIF2AK3
		GO:0043067~regulation_of_programmed_cell_death	4.68275e-06	TRAF2, MCL1, RXRA, CIDEB, TP53, PML, SMAD3, FADD, CALR, STAT1, TP73, SRC, TRADD, MYD88, BAX, LCK, TICAM1, CASP8, NPM1, PSME3, FAS, HSPA5, EIF2AK3
		GO:0070271~protein_complex_biogenesis	8.85841e-06	TRAF2, HSP90AA1, RSF1, CCNH, TP53, PML, SMAD3, FADD, TBP, CALR, SRC, FGG, BAX, IPO5, NPM1, CASP8, FAS, EIF2AK3
		GO:0006461~protein_complex_assembly	8.85841e-06	TRAF2, HSP90AA1, RSF1, CCNH, TP53, PML, SMAD3, FADD, TBP, CALR, SRC, FGG, BAX, IPO5, NPM1, CASP8, FAS, EIF2AK3
		GO:0044093~positive_regulation_of_molecular_function	1.28374e-05	TRAF2, PIK3CB, PTPLAD1, TP53, PML, SMAD3, STAT1, APOA1, MYD88, BAX, LCK, TICAM1, NPM1, CD81, PSME3, SCARB1, PPP2R4, ERC1, EIF2AK3
		GO:0006468~protein_amino_acid_phosphorylation	1.63858e-05	LYN, PIK3CB, TBK1, PTPLAD1, HCK, PML, PKN2, RAF1, STAT1, CDK2, SRC, IKBKE, FYN, LCK, CD81, JAK1, CSK, EIF2AK2, ERC1, EIF2AK3
		GO:0043065~positive_regulation_of_apoptosis	2.95328e-05	TRAF2, RXRA, CIDEB, TP53, PML, SMAD3, FADD, STAT1, TP73, SRC, TRADD, BAX, TICAM1, CASP8, LCK, FAS
		GO:0043068~positive_regulation_of_programmed_cell_death	3.03831e-05	TRAF2, RXRA, CIDEB, TP53, PML, SMAD3, FADD, STAT1, TP73, SRC, TRADD, BAX, TICAM1, CASP8, LCK, FAS
		GO:0010942~positive_regulation_of_cell_death	3.04368e-05	TRAF2, RXRA, CIDEB, TP53, PML, SMAD3, FADD, STAT1, TP73, SRC, TRADD, BAX, TICAM1, CASP8, LCK, FAS
		GO:0043123~positive_regulation_of_I-kappaB_kinase/NF-kappaB_cascade	3.11268e-05	IKBKE, MYD88, LTBR, VAPA, TBK1, TICAM1, CASP8, FADD, TRADD
		GO:0008633~activation_of_pro-apoptotic_gene_products	3.17412e-05	TRAF2, CASP8, SMAD3, FADD, FAS, TRADD
		GO:0006796~phosphate_metabolic_process	5.71353e-05	LYN, PIK3CB, TBK1, PTPLAD1, HCK, PKN2, PML, RAF1, STAT1, CDK2, SRC, NDUFV3, IKBKE, COX3, FYN, COX2, LCK, CD81, JAK1, CSK, EIF2AK2, ERC1, EIF2AK3
		GO:0006793~phosphorus_metabolic_process	5.71353e-05	LYN, PIK3CB, TBK1, PTPLAD1, HCK, PKN2, PML, RAF1, STAT1, CDK2, SRC, NDUFV3, IKBKE, COX3, FYN, COX2, LCK, CD81, JAK1, CSK, EIF2AK2, ERC1, EIF2AK3
		GO:0043122~regulation_of_I-kappaB_kinase/NF-kappaB_cascade	6.02653e-05	IKBKE, MYD88, LTBR, VAPA, TBK1, TICAM1, CASP8, FADD, TRADD
		GO:0009967~positive_regulation_of_signal_transduction	7.16804e-05	FKBP8, LTBR, VAPA, LYN, TBK1, FADD, SRC, TRADD, IKBKE, MYD88, CASP8, LCK, TICAM1
		GO:0010627~regulation_of_protein_kinase_cascade	8.63002e-05	IKBKE, MYD88, LTBR, LYN, VAPA, TBK1, PTPLAD1, TICAM1, CASP8, FADD, TP73, TRADD
		GO:0043281~regulation_of_caspase_activity	8.83061e-05	BAX, LCK, PML, TP53, SMAD3, HSPA5, STAT1, EIF2AK3
		GO:0052548~regulation_of_endopeptidase_activity	0.000105093	BAX, LCK, PML, TP53, SMAD3, HSPA5, STAT1, EIF2AK3
		GO:0006919~activation_of_caspase_activity	0.000122171	BAX, LCK, PML, TP53, SMAD3, STAT1, EIF2AK3
		GO:0012502~induction_of_programmed_cell_death	0.000128606	TP53, PML, CIDEB, SMAD3, FADD, STAT1, TP73, TRADD, BAX, CASP8, LCK, TICAM1, FAS
		GO:0006917~induction_of_apoptosis	0.000128661	TP53, PML, CIDEB, SMAD3, FADD, STAT1, TP73, TRADD, BAX, CASP8, LCK, TICAM1, FAS
		GO:0034622~cellular_macromolecular_complex_assembly	0.000129164	HIST4H4, RSF1, HSP90AA1, DICER1, SNRPD1, SMAD3, CALR, SRC, FGG, PRMT5, NPM1, IPO5, HIST3H2BB
		GO:0052547~regulation_of_peptidase_activity	0.000130165	BAX, LCK, PML, TP53, SMAD3, HSPA5, STAT1, EIF2AK3
		GO:0010740~positive_regulation_of_protein_kinase_cascade	0.000130174	IKBKE, MYD88, LTBR, LYN, VAPA, TBK1, TICAM1, CASP8, FADD, TRADD
		GO:0010647~positive_regulation_of_cell_communication	0.000151258	FKBP8, LTBR, VAPA, LYN, TBK1, FADD, SRC, TRADD, IKBKE, MYD88, CASP8, LCK, TICAM1
		GO:0043085~positive_regulation_of_catalytic_activity	0.000155121	TRAF2, PIK3CB, PTPLAD1, TP53, PML, SMAD3, STAT1, APOA1, BAX, LCK, NPM1, CD81, PSME3, SCARB1, PPP2R4, EIF2AK3
		GO:0010952~positive_regulation_of_peptidase_activity	0.000159844	BAX, LCK, PML, TP53, SMAD3, STAT1, EIF2AK3
		GO:0043280~positive_regulation_of_caspase_activity	0.000159844	BAX, LCK, PML, TP53, SMAD3, STAT1, EIF2AK3
		GO:0007249~I-kappaB_kinase/NF-kappaB_cascade	0.00022911	TRAF2, TBK1, PTPLAD1, TICAM1, IRF3, ERC1, STAT1
		GO:0034621~cellular_macromolecular_complex_subunit_organization	0.000320492	HIST4H4, RSF1, HSP90AA1, DICER1, SNRPD1, SMAD3, CALR, SRC, FGG, PRMT5, NPM1, IPO5, HIST3H2BB
		GO:0007243~protein_kinase_cascade	0.000447786	TRAF2, PIK3CB, TBK1, PTPLAD1, STAT1, SRC, STAT3, FYN, CD81, TICAM1, JAK1, IRF3, ERC1
		GO:0034097~response_to_cytokine_stimulus	0.000790362	MYD88, MCL1, CASP8, PML, STAT1, STAT3, SRC
		GO:0051336~regulation_of_hydrolase_activity	0.000962521	APOA2, APOA1, BAX, LCK, PML, TP53, SMAD3, PPP2R4, HSPA5, STAT1, EIF2AK3, TBC1D20
		GO:0043331~response_to_dsRNA	0.00103016	DICER1, TICAM1, SMAD3, IRF3, STAT1
		GO:0051345~positive_regulation_of_hydrolase_activity	0.00142925	APOA1, BAX, LCK, PML, TP53, SMAD3, PPP2R4, STAT1, EIF2AK3
		GO:0048002~antigen_processing_and_presentation_of_peptide_antigen	0.00156399	CD209, HLA-A, HLA-E, CALR, CLEC4M
		GO:0042592~homeostatic_process	0.00231558	RBP4, LYN, MCL1, PIK3CB, TP53, CALR, STAT3, APOA2, APOB, APOA1, BAX, LCK, MT2A, NPM1, LTF, SCARB1, FAS
		GO:0010604~positive_regulation_of_macromolecule_metabolic_process	0.00314419	PPARA, RSF1, LYN, CCNH, RXRA, TP53, PML, SMAD3, TBP, CALR, TP73, STAT3, CDK2, APOA2, TICAM1, CD81, PSME3, PPP2R4
		GO:0051098~regulation_of_binding	0.00352807	RSF1, MYD88, BAX, TICAM1, NPM1, SMAD3, ERC1, EIF2AK3
		GO:0042127~regulation_of_cell_proliferation	0.0037588	RBP4, CREB3, LYN, RXRA, TP53, PML, SMAD3, STAT1, CALR, CDK2, MYD88, BAX, TICAM1, NPM1, CD81, CSK, EIF2AK2
		GO:0034381~lipoprotein_particle_clearance	0.00598637	APOA2, APOB, APOA1, SCARB1
		GO:0001775~cell_activation	0.00610399	FGG, LYN, PIK3CB, FYN, BAX, LCK, TICAM1, TP53, SMAD3, FAS
		GO:0048878~chemical_homeostasis	0.00761679	RBP4, PIK3CB, TP53, CALR, STAT3, APOB, APOA2, APOA1, BAX, MT2A, LCK, LTF, SCARB1
		GO:0008283~cell_proliferation	0.00766351	RBP4, APOA1, FYN, PRMT5, BAX, RXRA, CD81, TP53, RAF1, SCARB1, BIN1, SRC
		GO:0006457~protein_folding	0.00768231	PFDN2, APOA2, FKBP8, HSP90AA1, PPIB, PFDN5, CALR, CANX
		GO:0031328~positive_regulation_of_cellular_biosynthetic_process	0.00890436	PPARA, RSF1, HSP90AA1, CCNH, RXRA, TP53, SMAD3, TBP, CALR, TP73, STAT3, CDK2, APOA2, TICAM1, NPM1
		GO:0018108~peptidyl-tyrosine_phosphorylation	0.00897926	LYN, FYN, JAK1, STAT1, SRC
		GO:0006955~immune_response	0.00923864	LYN, TBK1, TP53, HLA-A, SMAD3, OAS1, HLA-E, CLEC4M, IKBKE, MYD88, C1QBP, CD209, TICAM1, LTF, FAS
		GO:0009611~response_to_wounding	0.00950037	PPARA, LYN, PIK3CB, RXRA, SMAD3, TP73, STAT3, APOA2, FGG, MYD88, BAX, TICAM1, SCARB1
		GO:0009891~positive_regulation_of_biosynthetic_process	0.00959086	PPARA, RSF1, HSP90AA1, CCNH, RXRA, TP53, SMAD3, TBP, CALR, TP73, STAT3, CDK2, APOA2, TICAM1, NPM1
		GO:0018212~peptidyl-tyrosine_modification	0.00985801	LYN, FYN, JAK1, STAT1, SRC
		GO:0051346~negative_regulation_of_hydrolase_activity	0.00985801	APOA2, APOA1, TP53, PPP2R4, HSPA5
		GO:0001836~release_of_cytochrome_c_from_mitochondria	0.0112475	BAX, TP53, SMAD3, TP73
		GO:0032268~regulation_of_cellular_protein_metabolic_process	0.0129647	APOA1, LYN, PTPLAD1, BAX, EIF4A2, CD81, PML, PPP2R4, PSME3, CALR, EIF2AK3, TP73
		GO:0008629~induction_of_apoptosis_by_intracellular_signals	0.0147179	BAX, CIDEB, PML, TP53, TP73
		GO:0010608~posttranscriptional_regulation_of_gene_expression	0.0184395	APOA2, APOA1, EIF4A2, DICER1, PML, SMAD3, CALR, EIF2AK3
		GO:0034384~high-density_lipoprotein_particle_clearance	0.0185299	APOA2, APOA1, SCARB1
		GO:0019062~virion_attachment_to_host_cell_surface_receptor	0.0185299	CD209, CD81, CLEC4M
		GO:0006913~nucleocytoplasmic_transport	0.0202267	IPO5, NPM1, PML, TP53, CALR, HNRNPA1, KPNA1
		GO:0051169~nuclear_transport	0.0212737	IPO5, NPM1, PML, TP53, CALR, HNRNPA1, KPNA1
		GO:0022415~viral_reproductive_process	0.0228988	CREB3, CD209, CD81, SMAD3, CLEC4M
		GO:0031399~regulation_of_protein_modification_process	0.0264353	APOA1, LYN, PTPLAD1, BAX, CD81, PML, PPP2R4, PSME3, TP73
		GO:0008637~apoptotic_mitochondrial_changes	0.0310476	BAX, TP53, SMAD3, TP73
		GO:0048584~positive_regulation_of_response_to_stimulus	0.0316297	TRAF2, MYD88, CREB3, LYN, FYN, TICAM1, SMAD3, SRC
		GO:0016044~membrane_organization	0.0320607	HSP90AA1, VAPA, CD209, HCK, BAX, RAB5A, TP53, SCARB1, BIN1, CLEC4M
		GO:0051259~protein_oligomerization	0.032334	BAX, NPM1, CASP8, TP53, FADD, FAS, EIF2AK3
		GO:0008630~DNA_damage_response,_signal_transduction_resulting_in_induction_of_apoptosis	0.0342288	CIDEB, PML, TP53, TP73
		GO:0045321~leukocyte_activation	0.0344814	LYN, FYN, BAX, LCK, TICAM1, TP53, SMAD3, FAS
		GO:0016032~viral_reproduction	0.0346469	CREB3, CD209, CD81, SMAD3, CLEC4M
		GO:0034976~response_to_endoplasmic_reticulum_stress	0.0368071	TP53, HSPA5, EIF2AK2, EIF2AK3
		GO:0010605~negative_regulation_of_macromolecule_metabolic_process	0.0377259	PPARA, RSF1, RXRA, DICER1, TP53, PML, SMAD3, CALR, STAT3, BAX, NPM1, PSME3, PPP2R4, EIF2AK3
		GO:0051173~positive_regulation_of_nitrogen_compound_metabolic_process	0.037914	PPARA, RSF1, HSP90AA1, CCNH, RXRA, TP53, SMAD3, TBP, CALR, TP73, STAT3, CDK2, TICAM1
		GO:0006984~ER-nuclear_signaling_pathway	0.0384833	TP53, HSPA5, EIF2AK2, EIF2AK3
		GO:0042110~T_cell_activation	0.0391226	FYN, BAX, LCK, TP53, SMAD3, FAS
		GO:0010557~positive_regulation_of_macromolecule_biosynthetic_process	0.0404172	PPARA, RSF1, CCNH, RXRA, TP53, SMAD3, TBP, CALR, TP73, STAT3, CDK2, APOA2, TICAM1
		GO:0006983~ER_overload_response	0.0405049	TP53, HSPA5, EIF2AK3
		GO:0033554~cellular_response_to_stress	0.040513	LYN, CCNH, PTPLAD1, BAX, RXRA, CIDEB, PML, TP53, HSPA5, EIF2AK2, EIF2AK3, TP73
		GO:0051174~regulation_of_phosphorus_metabolic_process	0.0409002	TRAF2, APOA1, LYN, PIK3CB, PTPLAD1, BAX, CD81, NPM1, SMAD3, PPP2R4, TP73
		GO:0019220~regulation_of_phosphate_metabolic_process	0.0409002	TRAF2, APOA1, LYN, PIK3CB, PTPLAD1, BAX, CD81, NPM1, SMAD3, PPP2R4, TP73
		GO:0032496~response_to_lipopolysaccharide	0.0409152	MYD88, TICAM1, IRF3, SCARB1, STAT1
		GO:0030301~cholesterol_transport	0.0409724	APOA2, APOB, APOA1, SCARB1
		GO:0015918~sterol_transport	0.0409724	APOA2, APOB, APOA1, SCARB1
		GO:0051099~positive_regulation_of_binding	0.0413759	MYD88, TICAM1, NPM1, ERC1, EIF2AK3
		GO:0051726~regulation_of_cell_cycle	0.0417858	CREB3, PRMT5, BAX, NPM1, PML, TP53, SMAD3, CALR, CDK2
		GO:0009617~response_to_bacterium	0.04275	MYD88, HCK, TICAM1, LTF, IRF3, SCARB1, STAT1
		GO:0042632~cholesterol_homeostasis	0.0432074	APOA2, APOB, APOA1, SCARB1
		GO:0055092~sterol_homeostasis	0.0432074	APOA2, APOB, APOA1, SCARB1
		GO:0051806~entry_into_cell_of_other_organism_during_symbiotic_interaction	0.0458773	CD209, CD81, CLEC4M
		GO:0046718~entry_of_virus_into_host_cell	0.0458773	CD209, CD81, CLEC4M
		GO:0031663~lipopolysaccharide-mediated_signaling_pathway	0.0458773	TICAM1, IRF3, STAT1
		GO:0044409~entry_into_host	0.0458773	CD209, CD81, CLEC4M
		GO:0010885~regulation_of_cholesterol_storage	0.0458773	PPARA, APOB, SCARB1
		GO:0052126~movement_in_host_environment	0.0458773	CD209, CD81, CLEC4M
		GO:0052192~movement_in_environment_of_other_organism_during_symbiotic_interaction	0.0458773	CD209, CD81, CLEC4M
		GO:0030260~entry_into_host_cell	0.0458773	CD209, CD81, CLEC4M
		GO:0051828~entry_into_other_organism_during_symbiotic_interaction	0.0458773	CD209, CD81, CLEC4M
		GO:0043330~response_to_exogenous_dsRNA	0.0458773	TICAM1, IRF3, STAT1
		GO:0019882~antigen_processing_and_presentation	0.0483196	CD209, HLA-A, HLA-E, CALR, CLEC4M
	GO Cellular Compartment	GO:0005829~cytosol	3.53013e-08	TRAF2, TBK1, SNRPD1, CALR, SRC, MYD88, CASP8, TICAM1, NPM1, HSPA5, FAS, CSK, EEF1A1, HSP90AA1, LYN, CREB3, PIK3CB, CIDEB, TP53, SMAD3, RAF1, FADD, CDK2, TRADD, PFDN2, FYN, PFDN5, BAX, EIF4A2, LCK, IRF3, ERC1, KPNA1
		GO:0031974~membrane-enclosed_lumen	1.7848e-05	HIST4H4, MCL1, SNRPD1, PML, TBP, CALR, RTN3, APOB, FGG, APOA2, APOA1, HNRNPK, DDX3X, CASP8, NPM1, HSPA5, PITX1, LYN, CCNH, YY1, TP53, SMAD3, SSB, STAT1, NCL, HNRNPA1, STAT3, CDK2, TUT1, PPIB, C1QBP, IPO5, IRF3, KPNA1
		GO:0043233~organelle_lumen	2.62011e-05	HIST4H4, MCL1, SNRPD1, PML, TBP, CALR, RTN3, APOB, FGG, APOA2, APOA1, HNRNPK, DDX3X, CASP8, NPM1, HSPA5, PITX1, CCNH, YY1, TP53, SMAD3, SSB, STAT1, NCL, HNRNPA1, STAT3, CDK2, TUT1, PPIB, C1QBP, IPO5, IRF3, KPNA1
		GO:0070013~intracellular_organelle_lumen	4.00723e-05	HIST4H4, MCL1, SNRPD1, PML, TBP, CALR, RTN3, APOB, APOA2, APOA1, HNRNPK, DDX3X, CASP8, NPM1, HSPA5, PITX1, CCNH, YY1, TP53, SMAD3, SSB, STAT1, NCL, HNRNPA1, STAT3, CDK2, TUT1, PPIB, C1QBP, IPO5, IRF3, KPNA1
		GO:0031981~nuclear_lumen	0.00211802	HIST4H4, MCL1, SNRPD1, PML, TBP, RTN3, HNRNPK, DDX3X, CASP8, NPM1, PITX1, CCNH, YY1, TP53, SMAD3, SSB, STAT1, HNRNPA1, NCL, CDK2, STAT3, TUT1, IPO5, IRF3, KPNA1
		GO:0005788~endoplasmic_reticulum_lumen	0.00969083	APOA2, APOB, APOA1, PPIB, HSPA5, CALR
		GO:0005654~nucleoplasm	0.0103528	HIST4H4, MCL1, CCNH, YY1, TP53, PML, SNRPD1, SMAD3, TBP, HNRNPA1, NCL, CDK2, HNRNPK, DDX3X, NPM1, IRF3, KPNA1
		GO:0045121~membrane_raft	0.0109386	LYN, LCK, CASP8, RAB5A, SCARB1, FADD, SRC
		GO:0031264~death-inducing_signaling_complex	0.0114462	CASP8, FADD, FAS
		GO:0031975~envelope	0.0116224	FKBP8, MCL1, LYN, PML, SMAD3, RAF1, NDUFV3, COX3, COX2, FYN, BAX, CASP8, IPO5, KPNA1
		GO:0031967~organelle_envelope	0.0128716	FKBP8, MCL1, LYN, PML, SMAD3, RAF1, NDUFV3, COX3, COX2, FYN, BAX, CASP8, IPO5, KPNA1
		GO:0044432~endoplasmic_reticulum_part	0.0145135	APOA2, FKBP8, APOB, APOA1, PPIB, VAPA, BAX, HSPA5, CALR, EIF2AK3
		GO:0005730~nucleolus	0.0208875	TP53, PML, SSB, STAT1, HNRNPA1, NCL, STAT3, RTN3, TUT1, HNRNPK, IPO5, NPM1, CASP8, PITX1
		GO:0005783~endoplasmic_reticulum	0.0423553	FKBP8, CAMLG, CREB3, VAPA, TP53, OAS1, CALR, CANX, RTN3, APOA2, APOB, APOA1, PPIB, BAX, HSPA5, EIF2AK3
		GO:0005740~mitochondrial_envelope	0.0451169	NDUFV3, FKBP8, COX3, MCL1, LYN, COX2, FYN, BAX, CASP8, RAF1
	GO Molecular Function	GO:0042802~identical_protein_binding	9.53411e-05	HSP90AA1, CREB3, ACY3, PML, SMAD3, FADD, CDK2, TRADD, APOA2, APOA1, FYN, BAX, NPM1, CASP8, IRF3, PSME3, PPP2R4, FAS, EIF2AK3
		GO:0004715~non-membrane_spanning_protein_tyrosine_kinase_activity	0.000137517	LYN, FYN, HCK, LCK, JAK1, CSK, SRC
		GO:0019899~enzyme_binding	0.00136761	LYN, TP53, PML, SMAD3, UBQLN1, STAT3, TRADD, APOB, APOA1, IPO5, LCK, PPP2R4, FAS, ERC1, BIN1
		GO:0051082~unfolded_protein_binding	0.00147588	PFDN2, HSP90AA1, PPIB, PFDN5, NPM1, HSPA5, CALR, CANX
		GO:0046983~protein_dimerization_activity	0.00168937	HSP90AA1, CREB3, VAPA, MCL1, TP53, PML, SMAD3, STAT3, APOA2, APOB, BAX, NPM1, IRF3, PPP2R4, BIN1
		GO:0046982~protein_heterodimerization_activity	0.00195343	APOA2, APOB, MCL1, VAPA, BAX, NPM1, PML, TP53, PPP2R4, BIN1
		GO:0004672~protein_kinase_activity	0.00481363	LYN, TBK1, CCNH, HCK, PKN2, RAF1, SRC, CDK2, IKBKE, FYN, LCK, JAK1, EIF2AK2, CSK, EIF2AK3
		GO:0000166~nucleotide_binding	0.006035	TBK1, DICER1, OAS1, SRC, DDX3X, HSPA5, PTBP2, CSK, EEF1A1, HSP90AA1, LYN, PIK3CB, HCK, TP53, PKN2, RAF1, SSB, HNRNPA1, NCL, CDK2, TUT1, IKBKE, FYN, EIF4A2, LCK, RAB5A, JAK1, PPP2R4, EIF2AK2, SEPT6, SRCAP, EIF2AK3
		GO:0005524~ATP_binding	0.00918549	HSP90AA1, LYN, PIK3CB, TBK1, HCK, DICER1, TP53, PKN2, RAF1, OAS1, CDK2, SRC, IKBKE, DDX3X, FYN, EIF4A2, LCK, JAK1, PPP2R4, HSPA5, CSK, EIF2AK2, EIF2AK3, SRCAP
		GO:0032559~adenyl_ribonucleotide_binding	0.0100565	HSP90AA1, LYN, PIK3CB, TBK1, HCK, DICER1, TP53, PKN2, RAF1, OAS1, CDK2, SRC, IKBKE, DDX3X, FYN, EIF4A2, LCK, JAK1, PPP2R4, HSPA5, CSK, EIF2AK2, EIF2AK3, SRCAP
		GO:0032553~ribonucleotide_binding	0.0122905	TBK1, DICER1, OAS1, SRC, DDX3X, HSPA5, CSK, EEF1A1, HSP90AA1, LYN, PIK3CB, HCK, TP53, PKN2, RAF1, CDK2, IKBKE, FYN, EIF4A2, LCK, RAB5A, JAK1, PPP2R4, EIF2AK2, SEPT6, SRCAP, EIF2AK3
		GO:0032555~purine_ribonucleotide_binding	0.0122905	TBK1, DICER1, OAS1, SRC, DDX3X, HSPA5, CSK, EEF1A1, HSP90AA1, LYN, PIK3CB, HCK, TP53, PKN2, RAF1, CDK2, IKBKE, FYN, EIF4A2, LCK, RAB5A, JAK1, PPP2R4, EIF2AK2, SEPT6, SRCAP, EIF2AK3
		GO:0003723~RNA_binding	0.0158356	DICER1, SNRPD1, OAS1, SSB, TSN, CALR, HNRNPA1, NCL, TUT1, HNRNPK, DDX3X, EIF4A2, NPM1, PTBP2, EIF2AK2
		GO:0030554~adenyl_nucleotide_binding	0.0162246	HSP90AA1, LYN, PIK3CB, TBK1, HCK, DICER1, TP53, PKN2, RAF1, OAS1, CDK2, SRC, IKBKE, DDX3X, FYN, EIF4A2, LCK, JAK1, PPP2R4, HSPA5, CSK, EIF2AK2, EIF2AK3, SRCAP
		GO:0017076~purine_nucleotide_binding	0.0176426	TBK1, DICER1, OAS1, SRC, DDX3X, HSPA5, CSK, EEF1A1, HSP90AA1, LYN, PIK3CB, HCK, TP53, PKN2, RAF1, CDK2, IKBKE, FYN, EIF4A2, LCK, RAB5A, JAK1, PPP2R4, EIF2AK2, SEPT6, SRCAP, EIF2AK3
		GO:0001882~nucleoside_binding	0.0178789	HSP90AA1, LYN, PIK3CB, TBK1, HCK, DICER1, TP53, PKN2, RAF1, OAS1, CDK2, SRC, IKBKE, DDX3X, FYN, EIF4A2, LCK, JAK1, PPP2R4, HSPA5, CSK, EIF2AK2, EIF2AK3, SRCAP
		GO:0001883~purine_nucleoside_binding	0.0185785	HSP90AA1, LYN, PIK3CB, TBK1, HCK, DICER1, TP53, PKN2, RAF1, OAS1, CDK2, SRC, IKBKE, DDX3X, FYN, EIF4A2, LCK, JAK1, PPP2R4, HSPA5, CSK, EIF2AK2, EIF2AK3, SRCAP
		GO:0008035~high-density_lipoprotein_binding	0.0189754	APOA2, APOA1, SCARB1
		GO:0008134~transcription_factor_binding	0.0197244	CREB3, YY1, PFDN5, RXRA, NPM1, PML, TP53, SMAD3, IRF3, TBP, SRCAP, STAT3
		GO:0004713~protein_tyrosine_kinase_activity	0.0204975	LYN, FYN, HCK, LCK, JAK1, CSK, SRC
		GO:0042803~protein_homodimerization_activity	0.0411455	APOA2, HSP90AA1, CREB3, BAX, NPM1, PML, SMAD3, IRF3, PPP2R4
		GO:0016563~transcription_activator_activity	0.0426849	PPARA, RSF1, CREB3, YY1, RXRA, NPM1, PML, SMAD3, SRCAP, STAT3
		GO:0017127~cholesterol_transporter_activity	0.0444721	APOA2, APOB, APOA1
	INTERPRO	IPR000980:SH2_motif	9.36775e-05	LYN, FYN, HCK, LCK, JAK1, CSK, STAT1, STAT3, SRC
		IPR017441:Protein_kinase,_ATP_binding_site	0.000451536	LYN, TBK1, HCK, PKN2, RAF1, SRC, CDK2, IKBKE, FYN, LCK, JAK1, EIF2AK2, CSK, EIF2AK3
		IPR000719:Protein_kinase,_core	0.000491781	LYN, TBK1, HCK, PKN2, RAF1, SRC, CDK2, IKBKE, FYN, LCK, JAK1, EIF2AK2, CSK, EIF2AK3
		IPR008266:Tyrosine_protein_kinase,_active_site	0.00177557	LYN, FYN, HCK, LCK, JAK1, CSK, SRC
		IPR001245:Tyrosine_protein_kinase	0.00427513	LYN, FYN, HCK, LCK, JAK1, CSK, SRC
		IPR011029:DEATH-like	0.0319761	MYD88, CASP8, FADD, FAS, TRADD
		IPR000488:Death	0.0426603	MYD88, FADD, FAS, TRADD
	KEGG_PATHWAY	hsa04210:Apoptosis	0.000251249	TRAF2, MYD88, PIK3CB, BAX, CASP8, TP53, FADD, FAS, TRADD
		hsa05200:Pathways_in_cancer	0.000259896	TRAF2, HSP90AA1, PIK3CB, RXRA, TP53, PML, SMAD3, RAF1, FADD, STAT1, STAT3, CDK2, BAX, CASP8, JAK1, FAS
		hsa04620:Toll-like_receptor_signaling_pathway	0.000382957	IKBKE, MYD88, TBK1, PIK3CB, TICAM1, CASP8, IRF3, FADD, STAT1
		hsa04622:RIG-I-like_receptor_signaling_pathway	0.00042549	TRAF2, IKBKE, DDX3X, TBK1, CASP8, IRF3, FADD, TRADD
		hsa05212:Pancreatic_cancer	0.00282539	PIK3CB, TP53, SMAD3, RAF1, JAK1, STAT1, STAT3
		hsa04612:Antigen_processing_and_presentation	0.00514844	HSP90AA1, HLA-A, PSME3, HSPA5, HLA-E, CALR, CANX
		hsa04115:p53_signaling_pathway	0.0130395	BAX, CASP8, TP53, FAS, CDK2, TP73
		hsa05215:Prostate_cancer	0.0373259	HSP90AA1, CREB3, PIK3CB, TP53, RAF1, CDK2
		hsa05016:Huntington's_disease	0.0381448	NDUFV3, COX3, CREB3, COX2, BAX, CASP8, TP53, TBP
		hsa04650:Natural_killer_cell_mediated_cytotoxicity	0.0392473	PIK3CB, FYN, LCK, HLA-A, RAF1, FAS, HLA-E
	PANTHER_BP_ALL	BP00179:Apoptosis	2.80421e-05	TRAF2, FKBP8, LTBR, MCL1, PIK3CB, CIDEB, TP53, RAF1, FADD, TP73, STAT3, HNRNPK, BAX, CASP8, JAK1, SCARB1, FAS
		BP00148:Immunity_and_defense	2.89056e-05	PPARA, TBK1, OAS1, SDC2, SRC, FGG, MYD88, SCARB1, HSPA5, HSP90AA1, CAMLG, LTBR, LYN, HCK, HLA-A, TSN, HLA-E, STAT3, IKBKE, PPIB, C1QBP, FYN, LCK, CD81, IRF3, EIF2AK3
		BP00207:Cell_cycle_control	0.000511379	RSF1, LYN, CCNH, HCK, TP53, TP73, SRC, CDK2, FYN, BAX, LCK, JAK1, CSK
		BP00281:Oncogenesis	0.000697122	MCL1, LYN, HCK, TP53, RAF1, SMAD3, TP73, SRC, STAT3, FYN, BAX, LCK, IRF3
		BP00111:Intracellular_signaling_cascade	0.00102997	TRAF2, CAMLG, LYN, PIK3CB, TBK1, HCK, SMAD3, RAF1, SRC, STAT3, IKBKE, MYD88, FYN, PRMT5, LCK, RAB5A, JAK1, CSK
		BP00062:Protein_folding	0.00186364	PFDN2, FKBP8, HSP90AA1, PPIB, PFDN5, HSPA5, CALR, CANX
		BP00004:Carbohydrate_transport	0.00548708	LYN, FYN, HCK, LCK, SRC
		BP00265:Oncogene	0.00748411	LYN, FYN, HCK, LCK, RAF1, SRC
		BP00253:Induction_of_apoptosis	0.00802376	TRAF2, HNRNPK, BAX, CIDEB, TP53, FAS, TP73
		BP00196:Oogenesis	0.00886244	LYN, FYN, HCK, LCK, SRC
		BP00064:Protein_phosphorylation	0.0106019	LYN, TBK1, HCK, PKN2, SRC, CDK2, IKBKE, FYN, LCK, JAK1, EIF2AK2, CSK, EIF2AK3
		BP00073:Translational_regulation	0.0130167	EEF1A1, HNRNPK, EIF4A2, EIF2AK2, EIF2AK3
		BP00224:Cell_proliferation_and_differentiation	0.0432297	TRAF2, PPARA, RSF1, LYN, HCK, TP53, RAF1, TP73, SRC, FGG, FYN, BAX, LCK, JAK1, CSK
		BP00060:Protein_metabolism_and_modification	0.044262	FKBP8, RSF1, TBK1, PML, UBQLN1, CALR, CANX, SRC, HNRNPK, CASP8, HSPA5, CSK, EEF1A1, HSP90AA1, LYN, HCK, PKN2, CDK2, IKBKE, PFDN2, PPIB, FYN, PFDN5, EIF4A2, LCK, JAK1, PSME3, PPP2R4, EIF2AK2, EIF2AK3
	PANTHER_FAMILY	PTHR23256~TYROSINE_PROTEIN_KINASE	0.00126377	LYN, FYN, HCK, LCK, JAK1, CSK, SRC
	PANTHER_MF_ALL	MF00214:Non-receptor_tyrosine_protein_kinase	1.70368e-05	LYN, FYN, HCK, LCK, JAK1, CSK, SRC
		MF00108:Protein_kinase	0.00118707	LYN, TBK1, HCK, PKN2, RAF1, SRC, CDK2, IKBKE, FYN, LCK, JAK1, EIF2AK2, CSK, EIF2AK3
		MF00107:Kinase	0.00266781	LYN, PIK3CB, TBK1, HCK, PKN2, RAF1, SRC, CDK2, IKBKE, FYN, LCK, JAK1, EIF2AK2, CSK, EIF2AK3
		MF00069:Ribonucleoprotein	0.045914	HNRNPK, SNRPD1, SSB, PTBP2, HNRNPA1
	PANTHER_PATHWAY	P00006:Apoptosis_signaling_pathway	0.000675857	TRAF2, MCL1, PIK3CB, BAX, CASP8, TP53, FADD, FAS, HSPA5, EIF2AK2
		P00059:p53_pathway	0.010689	TRAF2, PIK3CB, BAX, PML, TP53, FAS, CDK2, TP73
		P00049:Parkinson_disease	0.0181703	LYN, FYN, HCK, LCK, HSPA5, CSK, SRC
	PFAM	PF00017:SH2	8.36626e-05	LYN, FYN, HCK, LCK, JAK1, CSK, STAT1, STAT3, SRC
		PF00017:SH2_domain	0.00157973	LYN, FYN, HCK, CSK, STAT1, STAT3, SRC
		PF07714:Pkinase_Tyr	0.0063065	LYN, FYN, HCK, LCK, JAK1, CSK, SRC
	PIR_SUPERFAMILY	PIRSF000601:tyrosine-protein_kinase,_proto-oncogene_SRC_type	0.000315943	LYN, FYN, HCK, CSK, SRC
	PROSITE	PS50011:Protein_kinase_domain_profile.	0.00156963	IKBKE, LYN, TBK1, FYN, HCK, PKN2, RAF1, EIF2AK2, CSK, EIF2AK3, SRC, CDK2
		PS50001:Src_homology_2_(SH2)_domain_profile.	0.00167468	LYN, FYN, HCK, CSK, STAT1, STAT3, SRC
		PS00109:PROTEIN_KINASE_TYR	0.00188271	LYN, FYN, HCK, LCK, JAK1, CSK, SRC
		PS00107:PROTEIN_KINASE_ATP	0.00197565	LYN, TBK1, HCK, PKN2, RAF1, CDK2, IKBKE, FYN, LCK, JAK1, EIF2AK2, CSK, EIF2AK3
		PS00107:Protein_kinases_ATP-binding_region_signature.	0.00240124	IKBKE, LYN, TBK1, FYN, HCK, PKN2, RAF1, EIF2AK2, CSK, EIF2AK3, SRC, CDK2
		PS00109:Tyrosine_protein_kinases_specific_active-site_signature.	0.033734	LYN, FYN, HCK, CSK, SRC
	REACTOME_PATHWAY	REACT_578:Apoptosis	0.0465591	TRAF2, BAX, CASP8, FADD, PSME3, FAS, KPNA1, TRADD
		REACT_6900:Signaling_in_Immune_system	0.0494394	LYN, PIK3CB, TBK1, HLA-A, HLA-E, SRC, APOB, FYN, CD81, LCK, TICAM1, IRF3, CSK
	SMART	SM00252:SH2	5.49062e-05	LYN, FYN, HCK, LCK, JAK1, CSK, STAT1, STAT3, SRC
		SM00219:TyrKc	0.00503081	LYN, FYN, HCK, LCK, JAK1, CSK, SRC
		SM00005:DEATH	0.0342983	MYD88, FADD, FAS, TRADD
	Keywords	host-virus_interaction	2.19108e-41	FKBP8, TBK1, PML, TBP, SP110, SRC, RTN3, APOA2, HNRNPK, DDX3X, NPM1, SCARB1, LTBR, LYN, CREB3, ACY3, HCK, RXRA, HLA-A, TP53, FADD, STAT1, HNRNPA1, STAT3, CLEC4M, C1QBP, FYN, CD209, EIF4A2, CD81, IPO5, LCK, IRF3, SEPT6, EIF2AK2, BIN1, TBC1D20, SRCAP, KPNA1
		acetylation	2.44769e-09	TRAF2, FKBP8, HIST4H4, RSF1, VAPA, UBQLN1, CALR, CANX, RTN3, APOB, HNRNPK, DDX3X, PRMT5, NPM1, HSPA5, PTBP2, HIST3H2BB, EEF1A1, HSP90AA1, PKN2, TP53, SMAD3, SSB, FADD, TSN, NCL, HNRNPA1, CDK2, TUT1, COX3, C1QBP, EIF4A2, BAX, PFDN5, IPO5, MT2A, LCK, RAB5A, PPP2R4, PSME3, SEPT6, EIF2AK2
		Apoptosis	9.15218e-07	TRAF2, FKBP8, LTBR, MCL1, CIDEB, TP53, FADD, TP73, TRADD, RTN3, BAX, TICAM1, CASP8, PSME3, FAS
		phosphoprotein	9.48397e-07	HIST4H4, RSF1, TBK1, DICER1, UBQLN1, CANX, RTN3, APOA2, APOB, APOA1, TICAM1, CASP8, LTF, PTBP2, FAS, HIST3H2BB, CSK, PITX1, FUNDC2, HSP90AA1, LYN, CCNH, YY1, PKN2, HLA-A, TP53, FADD, NCL, CDK2, TUT1, C1QBP, LCK, IPO5, RAB5A, PSME3, SEPT6, EIF2AK2, ERC1, BIN1, EIF2AK3, SRCAP, KPNA1, TRAF2, FKBP8, MCL1, PTPLAD1, PML, SP110, SRC, HNRNPK, DDX3X, NPM1, HSPA5, EEF1A1, HCK, CIDEB, SMAD3, RAF1, SSB, STAT…
		SH2_domain	5.57714e-06	LYN, FYN, HCK, LCK, JAK1, CSK, STAT1, STAT3, SRC
		isopeptide_bond	3.48927e-05	FGG, HIST4H4, HNRNPK, MCL1, RXRA, NPM1, PML, TP53, HIST3H2BB, STAT1, HNRNPA1, TP73
		atp-binding	0.000139898	HSP90AA1, LYN, PIK3CB, TBK1, HCK, DICER1, PKN2, RAF1, OAS1, CDK2, SRC, IKBKE, DDX3X, FYN, EIF4A2, LCK, JAK1, HSPA5, CSK, EIF2AK2, EIF2AK3, SRCAP
		nucleotide-binding	0.000140183	TBK1, DICER1, OAS1, SRC, DDX3X, HSPA5, CSK, EEF1A1, HSP90AA1, LYN, PIK3CB, HCK, PKN2, RAF1, CDK2, IKBKE, FYN, EIF4A2, LCK, RAB5A, JAK1, EIF2AK2, SEPT6, SRCAP, EIF2AK3
		cytoplasm	0.000188191	TRAF2, MCL1, TBK1, DICER1, PML, UBQLN1, CALR, MYD88, HNRNPK, DDX3X, PRMT5, CASP8, CSK, EEF1A1, HSP90AA1, LYN, ACY3, HCK, PKN2, TP53, SMAD3, TSN, STAT1, NCL, HNRNPA1, STAT3, TRADD, IKBKE, BAX, IPO5, LCK, IRF3, PSME3, SEPT6, ERC1, BIN1, KPNA1
		kinase	0.000321147	LYN, PIK3CB, TBK1, HCK, PKN2, RAF1, SRC, CDK2, IKBKE, FYN, LCK, JAK1, EIF2AK2, CSK, EIF2AK3
		tyrosine-protein_kinase	0.000537638	LYN, FYN, HCK, LCK, JAK1, CSK, SRC
		ubl_conjugation	0.00112078	TRAF2, HIST4H4, MCL1, RXRA, TP53, PML, HLA-A, STAT1, HNRNPA1, TP73, HNRNPK, NPM1, HIST3H2BB
		DNA_binding	0.00131901	PPARA, HIST4H4, HNRNPK, RXRA, PML, TP53, TBP, NCL, HNRNPA1, STAT3
		rna-binding	0.00201923	TUT1, HNRNPK, DDX3X, EIF4A2, DICER1, NPM1, OAS1, SSB, PTBP2, EIF2AK2, NCL, HNRNPA1
		liver	0.00392697	RBP4, APOA2, FGG, APOB, APOA1
		methylation	0.00406519	EEF1A1, HIST4H4, HNRNPK, SNRPD1, TP53, HIST3H2BB, NCL, HNRNPA1
		Antiviral_defense	0.00419572	TBK1, TICAM1, IRF3, EIF2AK2, STAT1
		activator	0.00509305	PPARA, CREB3, YY1, PML, TP53, IRF3, STAT1, SRCAP, STAT3, PITX1, TP73
		viral_nucleoprotein	0.00551635	HNRNPK, SNRPD1, SSB, HNRNPA1
		phosphotransferase	0.00756916	LYN, PIK3CB, FYN, PKN2, CSK, SRC, CDK2
		nucleus	0.00765376	PPARA, HIST4H4, RSF1, MCL1, SNRPD1, PML, OAS1, TBP, SP110, UBQLN1, HNRNPK, DDX3X, PRMT5, NPM1, PTBP2, HIST3H2BB, PITX1, LYN, CREB3, CCNH, RXRA, YY1, TP53, SMAD3, SSB, TSN, STAT1, NCL, HNRNPA1, STAT3, TP73, TUT1, IPO5, IRF3, PSME3, BIN1, SRCAP, KPNA1
		sh3_domain	0.00864167	LYN, FYN, HCK, LCK, BIN1, CSK, SRC
		transferase	0.00882854	LYN, PIK3CB, TBK1, HCK, PKN2, RAF1, OAS1, SRC, CDK2, TUT1, IKBKE, FYN, PRMT5, LCK, JAK1, CSK, EIF2AK2, EIF2AK3
		myristylation	0.0104921	LYN, FYN, SCARB1, SRC
		immune_response	0.0106012	MYD88, TBK1, CD209, TICAM1, HLA-A, HLA-E, CLEC4M
		disease_mutation	0.011488	RBP4, TP53, RAF1, TBP, STAT1, STAT3, FGG, APOB, APOA1, MYD88, COX3, COX2, BAX, LCK, CASP8, FAS, BIN1, EIF2AK3, PITX1
		Proto-oncogene	0.011664	LYN, FYN, LCK, NPM1, PML, RAF1, SRC
		Chaperone	0.0118431	PFDN2, HSP90AA1, PFDN5, NPM1, CALR, CANX
		plasma	0.0121707	RBP4, APOA2, FGG, APOB, APOA1
		tyrosine-specific_protein_kinase	0.0153216	LYN, FYN, CSK, SRC
		dna-binding	0.0254386	PPARA, HIST4H4, CREB3, YY1, RXRA, TP53, PML, TBP, SP110, TSN, STAT1, NCL, TP73, STAT3, HNRNPK, DDX3X, IRF3, HIST3H2BB, SRCAP, PITX1
		myristate	0.0258377	LYN, FYN, HCK, LCK, SRC
		palmitate	0.0359269	APOB, APOA1, LYN, FYN, HCK, LCK
		transmembrane_protein	0.0433563	COX3, MCL1, COX2, CD81, HLA-A, SCARB1, FAS, HLA-E, CANX, SDC2
		lipoprotein	0.0433563	APOA2, APOB, APOA1, LYN, FYN, HCK, LCK, RAB5A, SCARB1, SRC
		intestine	0.0442719	APOA2, APOB, APOA1
		ATP	0.0499949	LYN, FYN, PKN2, CSK, SRC, CDK2
Genotype 1B	Category	Term	Benjamini	Genes
1B	BLOCKS	IPB001881:EGF-like_calcium-binding	1.56064e-06	EGFL7, EFEMP2, LTBP4, NELL1, FBN1, NELL2, NID2, SLIT1, SLIT2, SLIT3, NOTCH1, FBLN2, FBLN5, THBS1
		IPB000152:Aspartic_acid_and_asparagine_hydroxylation_site	8.52729e-05	NOTCH1, FBLN1, EGFL7, FBLN2, FBLN5, NELL1, LTBP4, EFEMP2, FBN1, NELL2, NID2
		IPB001664:Intermediate_filament_protein	0.00362942	GFAP, KRT19, DES, KRT18, LMNB1, KRT8, VIM, NEFL, NEFM
	COG_NAME	COG1196:_Smc;_Chromosome_segregation_ATPases	0.0138497	TRIOBP, TXNDC11, SDCCAG8, NUP214, TBC1D2B, SYNE1, LAMB2, TRIP11
	COG_ONTOLOGY	Cell_division_and_chromosome_partitioning	0.000532933	TRIOBP, TXNDC11, SDCCAG8, NUP214, TBC1D2B, SYNE1, LAMB2, NDC80, TRIP11, PIK3R1
	GOTERM_BP_FAT	GO:0022610~biological_adhesion	2.38944e-05	ITGAL, AEBP1, BCAR1, NELL1, NELL2, ITGB4, BCAN, VTN, ITGB1, ISLR, AZGP1, LPXN, SORBS3, LAMB2, CTGF, AGT, SSX2IP, THBS1, MLLT4, SPON1, FN1, PARVG, TNXB, SVEP1, MGP, ACTN1, NID1, CELSR2, ACTN2, NID2, VWF, LAMC3, LAMA5, STAB1, FBLN5, CD209, VCAN, TGFB1I1, NCAN
		GO:0031589~cell-substrate_adhesion	2.42396e-05	PARVG, ITGB4, ACTN1, VTN, ACTN2, NID1, NID2, ITGB1, VWF, SORBS3, CTGF, LAMA5, FBLN5, AGT, FN1
		GO:0007155~cell_adhesion	3.52033e-05	ITGAL, AEBP1, BCAR1, NELL1, NELL2, ITGB4, BCAN, VTN, ITGB1, ISLR, AZGP1, LPXN, SORBS3, LAMB2, CTGF, AGT, SSX2IP, THBS1, MLLT4, SPON1, FN1, PARVG, TNXB, SVEP1, MGP, ACTN1, NID1, CELSR2, ACTN2, NID2, VWF, LAMC3, LAMA5, STAB1, FBLN5, CD209, VCAN, TGFB1I1, NCAN
		GO:0007160~cell-matrix_adhesion	0.00013266	PARVG, ITGB4, ACTN1, VTN, ACTN2, NID1, NID2, ITGB1, LAMA5, CTGF, FBLN5, AGT, FN1
		GO:0010604~positive_regulation_of_macromolecule_metabolic_process	0.00134833	RBM4, FHL2, TBP, ARNT, PSMB4, TNFRSF1A, APOA2, APOE, AGT, POU3F2, TAF9, AGRN, THBS1, SERTAD1, DNAJA3, AXIN1, TAF1, NFE2, TGFBR1, CREBBP, TP53, NR4A1, CDC23, DOCK7, DDX5, PSMB8, STAT3, PSMB9, TAF11, NOTCH1, PKNOX1, EP300, PSMA6, NUP62, JUN, CD81, JAK2, PSME3, TGFB1I1
		GO:0007010~cytoskeleton_organization	0.00143533	TRIOBP, CEP120, BCAR1, ITGB1, PFN1, DES, CEP250, APOE, KRT8, BCL6, NEFL, NEFM, FMNL1, INF2, TNXB, ARFIP2, ACTN1, NDC80, DOCK7, CEP63, UXT, KRT19, LAMA5, CFL1, TMSB4X, ARAP1
		GO:0016265~death	0.00149848	TRAF2, C7, VAPB, TBP, MAGED1, PLEKHG4, TNFRSF1A, SHARPIN, KRT8, THBS1, DNAJA3, AXIN1, OBSCN, TP53BP2, ARHGEF6, BCL2A1, YWHAB, TP53, TRIO, CD5L, YWHAE, PPP1R13L, SYNE1, KRT18, EP300, NUP62, RABEP1, JUN, PKM2, SIAH1, JAK2, PSME3, MAPK7, HSPD1, PARP4
		GO:0008219~cell_death	0.0015082	TRAF2, C7, VAPB, TBP, MAGED1, PLEKHG4, TNFRSF1A, SHARPIN, KRT8, THBS1, DNAJA3, AXIN1, OBSCN, TP53BP2, ARHGEF6, BCL2A1, YWHAB, TP53, TRIO, CD5L, YWHAE, PPP1R13L, SYNE1, KRT18, EP300, NUP62, RABEP1, JUN, PKM2, SIAH1, JAK2, PSME3, MAPK7, HSPD1, PARP4
		GO:0042981~regulation_of_apoptosis	0.00175975	TRAF2, YWHAZ, BCAR1, NELL1, TUBB2C, JAG2, DPF1, MAGED1, APOE, AGT, BCL6, TAF9, THBS1, NEFL, DNAJA3, OBSCN, TP53BP2, TGFBR1, ARHGEF6, BCL2A1, YWHAB, TP53, TRIO, NR4A1, ACTN1, ACTN2, YWHAE, CDKN1A, NOTCH1, KRT18, NUP62, JUN, CFL1, JAK2, PSME3, CTSB, HSPD1
		GO:0010941~regulation_of_cell_death	0.00193956	TRAF2, YWHAZ, BCAR1, NELL1, TUBB2C, JAG2, DPF1, MAGED1, APOE, AGT, BCL6, TAF9, THBS1, NEFL, DNAJA3, OBSCN, TP53BP2, TGFBR1, ARHGEF6, BCL2A1, YWHAB, TP53, TRIO, NR4A1, ACTN1, ACTN2, YWHAE, CDKN1A, NOTCH1, KRT18, NUP62, JUN, CFL1, JAK2, PSME3, CTSB, HSPD1
		GO:0043067~regulation_of_programmed_cell_death	0.00196305	TRAF2, YWHAZ, BCAR1, NELL1, TUBB2C, JAG2, DPF1, MAGED1, APOE, AGT, BCL6, TAF9, THBS1, NEFL, DNAJA3, OBSCN, TP53BP2, TGFBR1, ARHGEF6, BCL2A1, YWHAB, TP53, TRIO, NR4A1, ACTN1, ACTN2, YWHAE, CDKN1A, NOTCH1, KRT18, NUP62, JUN, CFL1, JAK2, PSME3, CTSB, HSPD1
		GO:0010033~response_to_organic_substance	0.00209905	TF, VAPB, GRB2, BCAR1, RBM4, FHL2, CALCOCO2, B2M, TNFRSF1A, APOA2, APOE, GAB1, ATF6B, PRKACA, TAF9, THBS1, NEFL, DNAJA3, PIK3R1, TGFBR1, CSNK2B, MGP, STAT3, CDKN1A, KRT19, EP300, NUP62, GNB2, SERPINF2, JUN, CFL1, JAK2, HSPD1, SETD2
		GO:0032270~positive_regulation_of_cellular_protein_metabolic_process	0.00400003	TAF1, TGFBR1, CDC23, DOCK7, PSMB8, PSMB9, PSMB4, EP300, PSMA6, APOE, AGT, CD81, PSME3, JAK2, THBS1, DNAJA3, AXIN1
		GO:0051247~positive_regulation_of_protein_metabolic_process	0.00615766	TAF1, TGFBR1, CDC23, DOCK7, PSMB8, PSMB9, PSMB4, EP300, PSMA6, APOE, AGT, CD81, PSME3, JAK2, THBS1, DNAJA3, AXIN1
		GO:0051270~regulation_of_cell_motion	0.00617808	CREB3, EGFL7, BCAR1, TGFBR1, JAG2, ACTN1, LAMA5, APOE, AGT, GAB1, BCL6, JAK2, THBS1, PIK3R1, ARAP1
		GO:0043065~positive_regulation_of_apoptosis	0.0099426	OBSCN, TRAF2, TP53BP2, NELL1, ARHGEF6, TGFBR1, TUBB2C, YWHAB, TP53, NR4A1, TRIO, YWHAE, DPF1, MAGED1, NOTCH1, CDKN1A, APOE, JUN, AGT, JAK2, BCL6, HSPD1, DNAJA3
		GO:0010942~positive_regulation_of_cell_death	0.00994507	OBSCN, TRAF2, TP53BP2, NELL1, ARHGEF6, TGFBR1, TUBB2C, YWHAB, TP53, NR4A1, TRIO, YWHAE, DPF1, MAGED1, NOTCH1, CDKN1A, APOE, JUN, AGT, JAK2, BCL6, HSPD1, DNAJA3
		GO:0043068~positive_regulation_of_programmed_cell_death	0.0103861	OBSCN, TRAF2, TP53BP2, NELL1, ARHGEF6, TGFBR1, TUBB2C, YWHAB, TP53, NR4A1, TRIO, YWHAE, DPF1, MAGED1, NOTCH1, CDKN1A, APOE, JUN, AGT, JAK2, BCL6, HSPD1, DNAJA3
		GO:0009611~response_to_wounding	0.0104646	C7, TF, ITGAL, YWHAZ, CFP, TNFRSF1A, APOA2, LAMB2, CTGF, SERPINC1, THBS1, NEFL, FN1, EFEMP2, SERPING1, STAT3, VWF, PLSCR1, NOTCH1, SERPINF2, STAB1, FBLN5, JAK2, VCAN, PARP4, CTSB
		GO:0032268~regulation_of_cellular_protein_metabolic_process	0.0122604	TAF1, TGFBR1, YWHAB, CDC23, DOCK7, SERPING1, YWHAE, PSMB8, PSMB9, PSMB4, EP300, PSMA6, APOE, JUN, AGT, GAB1, CD81, JAK2, PSME3, TAF9, EIF1, THBS1, DNAJA3, AXIN1
		GO:0012501~programmed_cell_death	0.0140385	TRAF2, MAGED1, TNFRSF1A, SHARPIN, KRT8, THBS1, DNAJA3, AXIN1, OBSCN, TP53BP2, ARHGEF6, BCL2A1, YWHAB, TP53, TRIO, CD5L, PPP1R13L, YWHAE, KRT18, EP300, RABEP1, JUN, PKM2, JAK2, SIAH1, PSME3, HSPD1, MAPK7
		GO:0007049~cell_cycle	0.0246705	LZTS2, CEP120, JAG2, LRRCC1, ITGB1, PSMB4, CEP250, THAP1, THBS1, KHDRBS1, TAF1, TP53BP2, RINT1, CINP, TP53, CDC23, NDC80, CEP63, SEPT10, PSMB8, GPS2, PSMB9, CDKN1A, KRT18, EP300, PSMA6, UBA3, PRM1, SIAH1, PSME3, MAPK7, ARAP1
		GO:0006915~apoptosis	0.0253558	TRAF2, MAGED1, TNFRSF1A, SHARPIN, KRT8, THBS1, DNAJA3, AXIN1, OBSCN, TP53BP2, ARHGEF6, BCL2A1, YWHAB, TP53, TRIO, CD5L, PPP1R13L, YWHAE, KRT18, EP300, RABEP1, JUN, JAK2, SIAH1, PSME3, HSPD1, MAPK7
		GO:0006928~cell_motion	0.0270583	ITGAL, BCAR1, TGFBR1, VIM, TUBB2C, ARFIP2, ITGB1, SLIT1, YWHAE, SLIT2, STAT3, SLIT3, CTGF, LAMA5, PAK4, CFL1, POU3F2, JAK2, VCAN, SIAH1, STRBP, THBS1, FN1
		GO:0031399~regulation_of_protein_modification_process	0.0300341	TGFBR1, YWHAB, CDC23, DOCK7, YWHAE, PSMB8, PSMB9, PSMB4, PSMA6, JUN, AGT, CD81, GAB1, PSME3, JAK2, DNAJA3, AXIN1
		GO:0031328~positive_regulation_of_cellular_biosynthetic_process	0.030287	RBM4, FHL2, TBP, ARNT, TNFRSF1A, APOA2, APOE, AGT, TAF9, POU3F2, AGRN, THBS1, SERTAD1, TAF1, NFE2, TGFBR1, CREBBP, TP53, NR4A1, DDX5, STAT3, TAF11, NOTCH1, PKNOX1, EP300, NUP62, JUN, JAK2, TGFB1I1
		GO:0048584~positive_regulation_of_response_to_stimulus	0.0306758	TRAF2, C7, CREB3, BCAR1, SERPING1, SLIT2, B2M, CFP, TNFRSF1A, AGT, TAF9, JAK2, HSPD1, THBS1, AXIN1
		GO:0031401~positive_regulation_of_protein_modification_process	0.0334558	TGFBR1, CDC23, DOCK7, PSMB8, PSMB9, PSMB4, PSMA6, AGT, CD81, PSME3, JAK2, DNAJA3, AXIN1
		GO:0009891~positive_regulation_of_biosynthetic_process	0.0345145	RBM4, FHL2, TBP, ARNT, TNFRSF1A, APOA2, APOE, AGT, TAF9, POU3F2, AGRN, THBS1, SERTAD1, TAF1, NFE2, TGFBR1, CREBBP, TP53, NR4A1, DDX5, STAT3, TAF11, NOTCH1, PKNOX1, EP300, NUP62, JUN, JAK2, TGFB1I1
		GO:0031099~regeneration	0.0349531	APOA2, CDKN1A, NOTCH1, LAMB2, TGFBR1, VCAN, JAK2, NEFL
		GO:0032535~regulation_of_cellular_component_size	0.0354213	TRIOBP, TGFBR1, TP53, DDX5, CDKN1A, EP300, LAMB2, AGT, CFL1, TMSB4X, BCL6, TAF9, NEFL, NEFM, XRN2, SERTAD1
		GO:0009725~response_to_hormone_stimulus	0.0357277	GRB2, BCAR1, TGFBR1, RBM4, FHL2, MGP, STAT3, APOA2, KRT19, CDKN1A, EP300, NUP62, GNB2, GAB1, JAK2, PRKACA, THBS1, NEFL, PIK3R1
		GO:0008104~protein_localization	0.0363001	YWHAZ, VPS52, SNX4, OS9, CCHCR1, NUP214, CEP250, CEP57, HOMER3, BCL6, EIF4ENIF1, RRBP1, KIF17, RINT1, PICK1, YWHAB, TP53, NDC80, ARFIP1, CBY1, YWHAE, CADPS, KRT18, NUP62, CADPS2, RABEP1, JUN, CD81, RAB14, TMSB4X, JAK2, SSR4, KPNA1, MVP
		GO:0009719~response_to_endogenous_stimulus	0.0408587	GRB2, BCAR1, TGFBR1, RBM4, FHL2, MGP, STAT3, APOA2, KRT19, CDKN1A, EP300, NUP62, GNB2, GAB1, CFL1, JAK2, PRKACA, THBS1, NEFL, PIK3R1
		GO:0043933~macromolecular_complex_subunit_organization	0.041051	TRAF2, HIST4H4, GRB2, TUBB2C, NAP1L1, TBP, NAP1L2, TNFRSF1A, LPXN, APOA2, APOE, AGT, TAF9, AGRN, HIST3H2BB, NEFL, TAF1, NFE2, CREBBP, PICK1, YWHAB, TRIM27, TP53, MGP, ACTN2, TAF11, VWF, HSPD1, XRN2
		GO:0030162~regulation_of_proteolysis	0.0420991	TAF1, EP300, APOE, LTBP4, TAF9, SERPING1, THBS1
		GO:0030036~actin_cytoskeleton_organization	0.0443758	INF2, FMNL1, TRIOBP, TNXB, BCAR1, ARFIP2, ACTN1, ITGB1, PFN1, KRT19, CFL1, TMSB4X, BCL6, ARAP1
		GO:0002526~acute_inflammatory_response	0.0495177	CFP, TF, C7, APOA2, YWHAZ, SERPINF2, SERPING1, STAT3, FN1
	GOTERM_CC_FAT	GO:0031012~extracellular_matrix	2.34076e-07	TF, SPOCK3, LTBP4, BCAN, VTN, MMRN2, LAMB2, CTGF, FBN3, AGRN, THBS1, SPON1, FN1, COL4A2, TNXB, EFEMP2, EFEMP1, FBN1, MGP, NID1, NID2, VWF, FBLN1, LAMC3, FBLN2, LAMA5, FBLN5, VCAN, NCAN
		GO:0005578~proteinaceous_extracellular_matrix	4.0077e-07	TF, SPOCK3, LTBP4, BCAN, VTN, MMRN2, LAMB2, CTGF, FBN3, AGRN, SPON1, FN1, COL4A2, TNXB, EFEMP2, EFEMP1, FBN1, MGP, NID1, NID2, VWF, FBLN1, LAMC3, FBLN2, LAMA5, FBLN5, VCAN, NCAN
		GO:0044421~extracellular_region_part	5.24313e-05	TF, SPOCK3, LTBP4, BCAN, VTN, FXYD6, MMRN2, CFP, APOA2, LAMB2, CTGF, APOE, AGT, SERPINC1, FBN3, AGRN, THBS1, FN1, SPON1, COL4A2, TNXB, EGFL7, EFEMP2, EFEMP1, FBN1, MGP, NID1, SERPING1, CD5L, NID2, SLIT1, SLIT2, SLIT3, NUCB1, VWF, FBLN1, LAMC3, SERPINF2, LAMA5, FBLN2, GRN, FBLN5, SFRP4, VCAN, HSPD1, NCAN
		GO:0005604~basement_membrane	5.2947e-05	TF, COL4A2, LAMB2, LAMC3, LAMA5, EFEMP2, FBN1, NID1, NID2, AGRN, MMRN2, FN1
		GO:0005856~cytoskeleton	6.41849e-05	LZTS2, GFAP, VAPA, PDLIM5, TUBB2C, DES, CEP250, HOMER3, PARVG, KIF17, PICK1, RAI14, ACTN1, ACTN2, CEP152, UXT, KRT19, KRT18, CFL1, TMSB4X, PDE4DIP, TGFB1I1, BIN1, TRIOBP, SDCCAG8, YWHAZ, CEP120, LMNB1, VIM, LRRCC1, CALCOCO2, FHL2, PSMB4, PFN1, SORBS3, CEP57, SORBS2, KRT8, NDRG1, STRBP, TRIP11, NEFL, DNAJA3, NEFM, NFE2, CEP192, SMEK2, SYNPO2, FRMPD4, CEP63, SEPT10, CORO1B, SYNE1, NUP62, CEP68, JAK…
		GO:0005829~cytosol	6.62025e-05	PDLIM5, BCAR1, RUSC2, TUBB2C, UBQLN4, FES, CEP250, GAB1, PRKACA, DPP7, CHUK, RNF31, ARHGEF6, TP53, CEP152, UXT, TACSTD2, PKM2, JUN, RAB14, FLAD1, KPNA1, TRAF2, SDCCAG8, GRB2, VIM, FTH1, NUP214, CEP57, UBASH3A, NEFL, PIK3R1, DNAJA3, MLLT4, AXIN1, EIF4ENIF1, OBSCN, EEF1A1, CREB3, CEP192, CSNK2B, YWHAB, TRIO, CDC23, ACLY, ARFIP1, CEP63, YWHAE, PSMB8, PSMB9, CADPS, CDKN1A, PKNOX1, RPL18A, JAK2, HSPD1
		GO:0030018~Z_disc	0.000250233	OBSCN, KRT19, DES, SORBS2, PDLIM5, KRT8, FHL2, ACTN1, ACTN2
		GO:0044420~extracellular_matrix_part	0.000324146	TF, COL4A2, TNXB, EFEMP2, FBN1, NID1, NID2, MMRN2, LAMB2, LAMA5, LAMC3, AGRN, FN1
		GO:0031674~I_band	0.000768409	OBSCN, KRT19, DES, SORBS2, PDLIM5, KRT8, FHL2, ACTN1, ACTN2
		GO:0005576~extracellular_region	0.00311285	AEBP1, NELL1, LTBP4, NELL2, BCAN, VTN, MMRN2, B2M, ST3GAL1, CFP, AZGP1, APOA2, CTGF, APOE, IGLL1, LTF, SPON1, EGFL7, MGP, ACTN1, ACTN2, SERPING1, SLIT1, SLIT2, SLIT3, NUCB1, LAMC3, SERPINF2, GRN, VCAN, CTSB, NCAN, DEAF1, TF, C7, SPOCK3, FXYD6, ISLR, TNFRSF1A, LAMB2, AGT, SERPINC1, FBN3, AGRN, THBS1, FN1, COL4A2, SVEP1, TNXB, EFEMP2, FBN1, EFEMP1, CSNK2B, CD5L, NID1, NID2, FUCA2, VWF, FBLN1, SRPX2…
		GO:0005813~centrosome	0.00330525	SDCCAG8, LZTS2, CEP120, CEP192, LRRCC1, SMEK2, CEP63, CEP152, UXT, PSMB4, KRT18, CEP57, CEP250, NUP62, CEP68, PDE4DIP
		GO:0030017~sarcomere	0.007	OBSCN, KRT19, SYNE1, DES, SORBS2, PDLIM5, KRT8, FHL2, ACTN1, ACTN2
		GO:0005925~focal_adhesion	0.00872348	PARVG, SORBS3, LIMS2, BCAR1, FHL2, ACTN1, ACTN2, TGFB1I1, ITGB1, LRRC7
		GO:0005815~microtubule_organizing_center	0.00889917	SDCCAG8, LZTS2, CEP120, CEP192, LRRCC1, SMEK2, CEP63, CEP152, UXT, PSMB4, KRT18, CEP57, CEP250, NUP62, CEP68, PDE4DIP
		GO:0005924~cell-substrate_adherens_junction	0.00943165	PARVG, SORBS3, LIMS2, BCAR1, FHL2, ACTN1, ACTN2, TGFB1I1, ITGB1, LRRC7
		GO:0043232~intracellular_non-membrane-bounded_organelle	0.0095005	MORF4L1, HIST4H4, LZTS2, GFAP, VAPA, PDLIM5, RBM4, TUBB2C, DES, CSNK2A1, CEP250, HOMER3, HIST3H2BB, LRRC7, PABPN1, PARVG, KIF17, PICK1, TP53, ACTN1, RAI14, ACTN2, CEP152, UXT, KRT19, EP300, KRT18, JUN, CFL1, PDE4DIP, TMSB4X, TGFB1I1, BIN1, XRN2, TRIOBP, SDCCAG8, YWHAZ, CEP120, LMNB1, VIM, LRRCC1, CALCOCO2, FHL2, PSMB4, PFN1, SORBS3, HNRNPK, CEP57, SORBS2, CENPC1, KRT8, BCL6, NDRG1, STRBP, NEFL, T…
		GO:0043228~non-membrane-bounded_organelle	0.0095005	MORF4L1, HIST4H4, LZTS2, GFAP, VAPA, PDLIM5, RBM4, TUBB2C, DES, CSNK2A1, CEP250, HOMER3, HIST3H2BB, LRRC7, PABPN1, PARVG, KIF17, PICK1, TP53, ACTN1, RAI14, ACTN2, CEP152, UXT, KRT19, EP300, KRT18, JUN, CFL1, PDE4DIP, TMSB4X, TGFB1I1, BIN1, XRN2, TRIOBP, SDCCAG8, YWHAZ, CEP120, LMNB1, VIM, LRRCC1, CALCOCO2, FHL2, PSMB4, PFN1, SORBS3, HNRNPK, CEP57, SORBS2, CENPC1, KRT8, BCL6, NDRG1, STRBP, NEFL, T…
		GO:0031982~vesicle	0.00979484	TF, YWHAZ, VAPA, GRB2, NAP1L1, BCAN, ITGB1, THBS1, DPP7, AXIN1, FN1, PICK1, YWHAB, PI4KA, ACTN1, SERPING1, ACTN2, YWHAE, CADPS, VWF, NOTCH1, CADPS2, SERPINF2, ZG16, RAB14, SIAH1, HSPD1, CTSB, BIN1
		GO:0031988~membrane-bounded_vesicle	0.00983005	TF, YWHAZ, GRB2, NAP1L1, BCAN, ITGB1, THBS1, DPP7, FN1, AXIN1, PICK1, YWHAB, PI4KA, ACTN1, SERPING1, ACTN2, YWHAE, VWF, NOTCH1, SERPINF2, ZG16, RAB14, SIAH1, HSPD1, CTSB, BIN1
		GO:0005912~adherens_junction	0.0100617	PARVG, SORBS3, LIMS2, BCAR1, FHL2, ACTN1, ACTN2, TGFB1I1, SSX2IP, ITGB1, MLLT4, LRRC7
		GO:0030016~myofibril	0.0105764	OBSCN, KRT19, SYNE1, DES, SORBS2, PDLIM5, KRT8, FHL2, ACTN1, ACTN2
		GO:0030055~cell-substrate_junction	0.0107509	PARVG, SORBS3, LIMS2, BCAR1, FHL2, ACTN1, ACTN2, TGFB1I1, ITGB1, LRRC7
		GO:0044449~contractile_fiber_part	0.0109446	OBSCN, KRT19, SYNE1, DES, SORBS2, PDLIM5, KRT8, FHL2, ACTN1, ACTN2
		GO:0016023~cytoplasmic_membrane-bounded_vesicle	0.011312	TF, YWHAZ, NAP1L1, BCAN, ITGB1, THBS1, DPP7, FN1, AXIN1, PICK1, PI4KA, YWHAB, ACTN1, SERPING1, ACTN2, YWHAE, VWF, NOTCH1, SERPINF2, ZG16, RAB14, SIAH1, HSPD1, CTSB, BIN1
		GO:0031091~platelet_alpha_granule	0.0150924	VWF, SERPINF2, ACTN1, SERPING1, ACTN2, THBS1, FN1
		GO:0070161~anchoring_junction	0.0155439	PARVG, SORBS3, LIMS2, BCAR1, FHL2, ACTN1, ACTN2, TGFB1I1, SSX2IP, ITGB1, MLLT4, LRRC7
		GO:0005669~transcription_factor_TFIID_complex	0.0155778	TAF11, TAF1, TP53, TAF9, TBP
		GO:0043292~contractile_fiber	0.0156803	OBSCN, KRT19, SYNE1, DES, SORBS2, PDLIM5, KRT8, FHL2, ACTN1, ACTN2
		GO:0031410~cytoplasmic_vesicle	0.0165558	TF, YWHAZ, NAP1L1, BCAN, ITGB1, THBS1, DPP7, AXIN1, FN1, PICK1, YWHAB, PI4KA, ACTN1, SERPING1, ACTN2, YWHAE, CADPS, VWF, NOTCH1, CADPS2, SERPINF2, ZG16, RAB14, SIAH1, HSPD1, CTSB, BIN1
		GO:0016323~basolateral_plasma_membrane	0.0167271	PARVG, TF, LIMS2, BCAR1, TGFBR1, ITGB4, ACTN1, FHL2, ACTN2, ITGB1, SORBS3, TGFB1I1, LRRC7
		GO:0031093~platelet_alpha_granule_lumen	0.0188033	SERPINF2, ACTN1, SERPING1, ACTN2, THBS1, FN1
		GO:0030141~secretory_granule	0.0193259	TF, VWF, NOTCH1, SERPINF2, ZG16, RAB14, ACTN1, SERPING1, ACTN2, HSPD1, THBS1, FN1
		GO:0044430~cytoskeletal_part	0.0235142	SDCCAG8, LZTS2, GFAP, YWHAZ, CEP120, VAPA, LMNB1, VIM, TUBB2C, LRRCC1, PSMB4, DES, CEP250, CEP57, HOMER3, KRT8, NEFL, NEFM, DNAJA3, KIF17, CEP192, PICK1, SMEK2, ACTN2, CEP63, SEPT10, CEP152, UXT, KRT19, KRT18, NUP62, CEP68, CFL1, PDE4DIP, PARP4
		GO:0060205~cytoplasmic_membrane-bounded_vesicle_lumen	0.0242379	SERPINF2, ACTN1, SERPING1, ACTN2, THBS1, FN1
		GO:0031983~vesicle_lumen	0.0286232	SERPINF2, ACTN1, SERPING1, ACTN2, THBS1, FN1
		GO:0048471~perinuclear_region_of_cytoplasm	0.0354812	TF, VAPA, TP53BP2, PICK1, YWHAB, JAG2, CALCOCO2, UBQLN1, PNPLA8, KRT18, CEP250, GNB2, SORBS2, RAB14, GAPDH
	GOTERM_MF_FAT	GO:0005198~structural_molecule_activity	1.25419e-05	MEGF8, GFAP, VAPA, LMNB1, VAPB, NELL1, TUBB2C, VIM, NELL2, MBP, SORBS3, DES, LAMB2, SORBS2, KRT8, FBN3, AGRN, THBS1, NEFL, NEFM, FN1, OBSCN, COL4A2, TNXB, EFEMP2, FBN1, MGP, ACTN2, SLIT3, FBLN1, KRT19, KRT18, NUP62, RPL18A, LAMC3, FBLN2, LAMA5
		GO:0019899~enzyme_binding	2.45907e-05	GLRX3, TRIOBP, VAPB, PDLIM5, NELL1, BCAR1, VIM, UBQLN1, FTH1, PFN1, CEP250, SERPINC1, PRKACA, NEFL, DNAJA3, PIK3R1, FMNL1, INF2, ZMYM2, TGFBR1, PICK1, YWHAB, ARFIP2, TP53, DOCK7, YWHAE, STAT3, VWF, SERPINF2, JAK2, PARP4, BIN1
		GO:0008134~transcription_factor_binding	8.67855e-05	YWHAZ, RBM4, FHL2, TBP, ARNT, TMF1, MAGED1, SORBS3, TAF9, TRIP11, DNAJA3, TAF1, NFE2, CREB3, TP53BP2, LDB1, CREBBP, YWHAB, CSNK2B, TP53, ACTN2, DDX5, PPP1R13L, STAT3, GPS2, TAF11, EP300, NUP62, JUN, TGFB1I1
		GO:0032403~protein_complex_binding	9.26577e-05	YWHAZ, TNXB, LTBP4, TGFBR1, YWHAB, ACTN1, ACTN2, ITGB1, VWF, TNFRSF1A, CDKN1A, CTGF, LAMA5, FBLN5, PRKACA, FRS3, THBS1, PIK3R1
		GO:0005178~integrin_binding	0.000276574	VWF, TNXB, CTGF, LAMA5, FBLN5, LTBP4, ACTN1, ACTN2, THBS1, ITGB1
		GO:0005509~calcium_ion_binding	0.00203785	ITGAL, MEGF8, FKBP7, SPOCK3, LTBP4, NELL1, NELL2, JAG2, FBN3, THBS1, SVEP1, EGFL7, EFEMP2, FBN1, EFEMP1, MGP, ACTN1, NID1, CELSR2, ACTN2, NID2, SLIT1, SLIT2, STAT3, SLIT3, CADPS, NUCB1, PLSCR1, FBLN1, NOTCH1, CADPS2, FBLN2, CD209, FBLN5, VCAN, SSR4, NCAN, RCN3, MEGF6
		GO:0005539~glycosaminoglycan_binding	0.00210402	TNXB, SPOCK3, LTBP4, BCAN, VTN, STAB1, APOE, CTGF, SERPINC1, VCAN, THBS1, NCAN, FN1
		GO:0030247~polysaccharide_binding	0.00468657	TNXB, SPOCK3, LTBP4, BCAN, VTN, STAB1, APOE, CTGF, SERPINC1, VCAN, THBS1, NCAN, FN1
		GO:0001871~pattern_binding	0.00468657	TNXB, SPOCK3, LTBP4, BCAN, VTN, STAB1, APOE, CTGF, SERPINC1, VCAN, THBS1, NCAN, FN1
		GO:0005200~structural_constituent_of_cytoskeleton	0.00702612	GFAP, KRT19, SORBS3, DES, SORBS2, VIM, AGRN, NEFL, NEFM
		GO:0003712~transcription_cofactor_activity	0.0077698	TAF1, NFE2, CREB3, LDB1, CREBBP, RBM4, YWHAB, FHL2, ACTN2, DDX5, PPP1R13L, ARNT, TMF1, GPS2, MAGED1, TAF11, EP300, TAF9, TGFB1I1, TRIP11
		GO:0019904~protein_domain_specific_binding	0.00790193	KHDRBS1, YWHAZ, NFE2, TP53BP2, GRB2, BCAR1, LDB1, PICK1, YWHAB, CSNK2B, USHBP1, ACTN2, YWHAE, PLSCR1, NUP62, JAK2, TAF9, NEFL, AXIN1
		GO:0002039~p53_binding	0.012319	TAF1, CREBBP, TAF9, PSME3, HSPD1
		GO:0005201~extracellular_matrix_structural_constituent	0.0128385	FBLN1, COL4A2, TNXB, FBLN2, EFEMP2, FBN1, MGP, FBN3, FN1
		GO:0019900~kinase_binding	0.0128953	GLRX3, BCAR1, PDLIM5, NELL1, PICK1, VIM, UBQLN1, STAT3, FTH1, CEP250, PRKACA, JAK2, DNAJA3
		GO:0003713~transcription_coactivator_activity	0.0152169	TAF1, NFE2, CREB3, CREBBP, RBM4, FHL2, ACTN2, ARNT, TAF11, MAGED1, EP300, TAF9, TGFB1I1, TRIP11
		GO:0042802~identical_protein_binding	0.0204675	VAPB, FHL2, CALCOCO2, UBQLN4, ACP1, ITGB1, MAGED1, APOA2, CEP57, APOE, SHARPIN, POU3F2, THBS1, NEFL, CHUK, AXIN1, CREB3, LDB1, PICK1, CSNK2B, NR4A1, ACTN2, CBY1, VWF, PSME3, SMURF2, C9ORF30
		GO:0016563~transcription_activator_activity	0.0214546	DEAF1, ZNF281, TAF1, NFE2, CREB3, RBM4, CREBBP, FHL2, NR4A1, ACTN2, STAT3, ARNT, MAGED1, TAF11, NOTCH1, EP300, TAF9, TGFB1I1, TRIP11, SERTAD1
		GO:0046983~protein_dimerization_activity	0.0220509	ITGAL, NFE2, CREB3, VAPA, VAPB, LDB1, TGFBR1, TP53, NR4A1, CALCOCO2, ACTN2, ITGB1, STAT3, ARNT, VWF, APOA2, PKNOX1, CEP57, APOE, JUN, ATF6B, UBA3, BIN1, AXIN1
		GO:0017048~Rho_GTPase_binding	0.0253076	INF2, FMNL1, PFN1, TRIOBP, ARFIP2, DOCK7
		GO:0046982~protein_heterodimerization_activity	0.0291427	ITGAL, VAPA, VAPB, TGFBR1, TP53, NR4A1, ITGB1, ARNT, APOA2, PKNOX1, APOE, UBA3, BIN1
		GO:0050840~extracellular_matrix_binding	0.0470693	FBLN2, NID1, VTN, AGRN, THBS1
	INTERPRO	IPR013032:EGF-like_region,_conserved_site	3.04076e-16	MEGF8, C7, LTBP4, NELL1, NELL2, ITGB4, JAG2, BCAN, ITGB1, LAMB2, FBN3, AGRN, THBS1, FN1, TNXB, SVEP1, EGFL7, EFEMP2, FBN1, EFEMP1, NID1, CELSR2, NID2, SLIT1, SLIT2, SLIT3, FBLN1, NOTCH1, LAMC3, LAMA5, STAB1, FBLN2, FBLN5, VCAN, C9ORF30, NCAN, MEGF6
		IPR000152:EGF-type_aspartate/asparagine_hydroxylation_conserved_site	1.23798e-15	MEGF8, SVEP1, EGFL7, NELL1, EFEMP2, LTBP4, FBN1, EFEMP1, NELL2, JAG2, NID1, CELSR2, NID2, SLIT1, SLIT2, FBLN1, NOTCH1, FBLN2, FBLN5, VCAN, FBN3, NCAN, MEGF6
		IPR000742:EGF-like,_type_3	1.52411e-15	MEGF8, NELL1, LTBP4, NELL2, JAG2, BCAN, FBN3, AGRN, THBS1, TNXB, SVEP1, EGFL7, EFEMP2, FBN1, EFEMP1, NID1, CELSR2, NID2, SLIT1, SLIT2, SLIT3, FBLN1, NOTCH1, FBLN2, STAB1, FBLN5, VCAN, C9ORF30, MEGF6, NCAN
		IPR018097:EGF-like_calcium-binding,_conserved_site	1.94948e-15	MEGF8, SVEP1, EGFL7, NELL1, EFEMP2, LTBP4, FBN1, EFEMP1, NELL2, JAG2, NID1, NID2, SLIT1, SLIT2, SLIT3, FBLN1, NOTCH1, FBLN2, FBLN5, VCAN, FBN3, NCAN, MEGF6
		IPR001881:EGF-like_calcium-binding	1.94948e-15	MEGF8, EGFL7, NELL1, EFEMP2, LTBP4, FBN1, EFEMP1, NELL2, JAG2, NID1, CELSR2, NID2, SLIT1, SLIT2, SLIT3, FBLN1, NOTCH1, FBLN2, FBLN5, VCAN, FBN3, NCAN, MEGF6
		IPR006210:EGF-like	2.37366e-13	MEGF8, NELL1, LTBP4, NELL2, JAG2, BCAN, FBN3, AGRN, THBS1, SVEP1, TNXB, EGFL7, EFEMP2, FBN1, CELSR2, NID1, NID2, SLIT1, SLIT2, SLIT3, FBLN1, NOTCH1, FBLN2, STAB1, VCAN, C9ORF30, MEGF6, NCAN
		IPR013091:EGF_calcium-binding	2.50922e-12	MEGF8, SVEP1, EGFL7, NELL1, EFEMP2, LTBP4, FBN1, EFEMP1, NELL2, JAG2, NID1, NID2, NOTCH1, FBLN1, FBLN2, FBLN5, FBN3, MEGF6
		IPR006209:EGF	3.91061e-10	SVEP1, LTBP4, FBN1, JAG2, BCAN, NID1, CELSR2, NID2, SLIT1, SLIT2, SLIT3, NOTCH1, STAB1, VCAN, FBN3, AGRN, C9ORF30, NCAN, MEGF6, THBS1
		IPR013111:EGF,_extracellular	2.57487e-05	MEGF8, TNXB, SVEP1, EGFL7, STAB1, NELL1, FBN1, NELL2, ITGB4, MEGF6, ITGB1
		IPR006821:Intermediate_filament,_DNA-binding_region	0.000331591	GFAP, DES, VIM, NEFL, NEFM
		IPR002049:EGF-like,_laminin	0.000774158	MEGF8, LAMB2, LAMC3, STAB1, LAMA5, CELSR2, AGRN, MEGF6
		IPR001791:Laminin_G	0.00132975	LAMA5, NELL1, NELL2, CELSR2, AGRN, SLIT1, SLIT2, SLIT3
		IPR016044:Filament	0.00388118	GFAP, KRT19, DES, KRT18, LMNB1, KRT8, VIM, NEFL, NEFM
		IPR018039:Intermediate_filament_protein,_conserved_site	0.00388118	GFAP, KRT19, DES, KRT18, LMNB1, KRT8, VIM, NEFL, NEFM
		IPR001664:Intermediate_filament_protein	0.00395718	GFAP, KRT19, DES, KRT18, LMNB1, KRT8, VIM, NEFL, NEFM
		IPR013320:Concanavalin_A-like_lectin/glucanase,_subgroup	0.0053789	SVEP1, LAMA5, NELL2, CELSR2, AGRN, THBS1, SLIT1, SLIT2, SLIT3
		IPR016060:Complement_control_module	0.0334268	C7, SVEP1, SRPX2, BCAN, VCAN, NCAN, FN1
		IPR001452:Src_homology-3_domain	0.0357715	TP53BP2, GRB2, BCAR1, ARHGEF6, RUSC2, BZRAP1, TRIO, PPP1R13L, SORBS3, SORBS2, UBASH3A, BIN1, PIK3R1
		IPR001007:von_Willebrand_factor,_type_C	0.0370664	VWF, CTGF, NELL1, NELL2, JAG2, THBS1
		IPR006207:Cystine_knot,_C-terminal	0.0423034	VWF, CTGF, SLIT1, SLIT2, SLIT3
		IPR012680:Laminin_G,_subdomain_2	0.0437179	LAMA5, NELL2, CELSR2, SLIT1, SLIT2, SLIT3
	KEGG_PATHWAY	hsa04510:Focal_adhesion	0.00012952	PARVG, COL4A2, TNXB, GRB2, BCAR1, ITGB4, ACTN1, VTN, ACTN2, ITGB1, VWF, LAMB2, LAMC3, LAMA5, JUN, PAK4, THBS1, PIK3R1, FN1
		hsa04512:ECM-receptor_interaction	0.000244895	VWF, COL4A2, TNXB, LAMB2, LAMC3, LAMA5, ITGB4, VTN, AGRN, THBS1, ITGB1, FN1
		hsa04520:Adherens_junction	0.00315234	CSNK2A1, EP300, TGFBR1, CREBBP, CSNK2B, ACTN1, ACTN2, SSX2IP, ACP1, MLLT4
		hsa05222:Small_cell_lung_cancer	0.00467611	TRAF2, COL4A2, LAMB2, LAMC3, LAMA5, TP53, ITGB1, CHUK, PIK3R1, FN1
		hsa05200:Pathways_in_cancer	0.00634242	TRAF2, COL4A2, GRB2, TGFBR1, CREBBP, TP53, ITGB1, STAT3, ARNT, CDKN1A, EP300, LAMB2, LAMC3, LAMA5, JUN, JAK1, CHUK, PIK3R1, AXIN1, FN1
		hsa05211:Renal_cell_carcinoma	0.0252892	EP300, GRB2, JUN, PAK4, GAB1, CREBBP, PIK3R1, ARNT
		hsa04722:Neurotrophin_signaling_pathway	0.0448955	MAGED1, YWHAZ, GRB2, JUN, GAB1, YWHAB, TP53, MAPK7, YWHAE, PIK3R1
	PANTHER_BP_ALL	BP00285:Cell_structure_and_motility	3.65006e-07	GFAP, VAPA, VAPB, BCAR1, PDLIM5, TUBB2C, JAG2, MBP, DES, CSNK2A1, SPON1, PARVG, FMNL1, EGFL7, ACTN1, ACTN2, SLIT1, SLIT2, SLIT3, KRT19, KRT18, CFL1, VCAN, TGFB1I1, TRIOBP, LIMS2, LMNB1, VIM, ITGB1, LPXN, SORBS3, KIF7, KRT8, NEFL, NEFM, MLLT4, FN1, COL4A2, RRBP1, CSNK2B, ARFIP2, TRIO, SYNPO2, CELSR2, ARFIP1, RGNEF, STAT3, CORO1B, NOTCH1, JAK1, JAK2, ARAP1
		BP00287:Cell_motility	2.76203e-06	LIMS2, VAPA, VAPB, PDLIM5, TUBB2C, JAG2, ITGB1, LPXN, FMNL1, PARVG, EGFL7, ARFIP2, CELSR2, SYNPO2, ARFIP1, SLIT1, STAT3, SLIT2, SLIT3, CORO1B, NOTCH1, JAK1, JAK2, VCAN, TGFB1I1
		BP00275:Extracellular_matrix_protein-mediated_signaling	1.5273e-05	TNXB, LAMB2, LAMC3, STAB1, CTGF, LAMA5, VCAN, AGRN, MEGF6, ITGB1, FN1
		BP00286:Cell_structure	0.000906859	TRIOBP, GFAP, LMNB1, PDLIM5, VIM, TUBB2C, MBP, LPXN, SORBS3, DES, CSNK2A1, KIF7, KRT8, NEFL, NEFM, MLLT4, SPON1, FN1, COL4A2, ARFIP2, CSNK2B, ACTN1, SYNPO2, CELSR2, ACTN2, ARFIP1, CORO1B, KRT19, KRT18, CFL1
		BP00201:Skeletal_development	0.0234	FBLN1, FBLN2, FBLN5, LTBP4, EFEMP2, FBN1, EFEMP1, MGP, FBN3, SMURF2
	PANTHER_FAMILY	PTHR11201~EGF-LIKE_DOMAIN_PROTEIN	1.70907e-07	EFEMP2, LTBP4, NELL1, FBN1, EFEMP1, NELL2, JAG2, NOTCH1, FBLN1, STAB1, FBLN2, FBLN5, FBN3, MEGF6
		PTHR23239~INTERMEDIATE_FILAMENT	0.0183519	GFAP, KRT19, DES, KRT18, LMNB1, KRT8, VIM, NEFL, NEFM
		PTHR10574~LAMININ	0.0190976	MEGF8, LAMB2, LAMC3, LAMA5, AGRN, C9ORF30
	PANTHER_MF_ALL	MF00180:Extracellular_matrix_glycoprotein	2.54313e-10	TNXB, EFEMP2, LTBP4, FBN1, EFEMP1, BCAN, NID1, NID2, MMRN2, VWF, FBLN1, FBLN2, FBLN5, VCAN, FBN3, MEGF6, NCAN, SPON1
		MF00178:Extracellular_matrix	4.08263e-10	LTBP4, BCAN, MMRN2, ISLR, LAMB2, LRRTM1, FBN3, THBS1, SPON1, FN1, COL4A2, TNXB, RRBP1, EFEMP2, FBN1, EFEMP1, MGP, NID1, NID2, SLIT1, SLIT2, SLIT3, VWF, FBLN1, LAMC3, LAMA5, STAB1, FBLN2, FBLN5, VCAN, MEGF6, NCAN
		MF00219:Annexin	3.94404e-06	NUCB1, FBLN1, FBLN2, FBLN5, NELL1, LTBP4, EFEMP2, FBN1, NELL2, EFEMP1, MGP, FBN3
		MF00188:Select_calcium_binding_protein	0.00198923	SPOCK3, EGFL7, NELL1, EFEMP2, LTBP4, FBN1, EFEMP1, NELL2, MGP, NUCB1, CADPS, FBLN1, CADPS2, FBLN2, FBLN5, FBN3, RCN3
		MF00197:Miscellaneous_function	0.00287795	TRAF2, TF, MEGF8, GFAP, LIMS2, LMNB1, GRB2, NELL1, VIM, NELL2, UBQLN4, UBQLN1, PTMA, FTH1, MBP, CFP, DES, GAB1, KRT8, RSPH3, LTF, FRS3, NEFL, NEFM, LRRC7, AXIN1, PICK1, MGP, CDC23, KRT19, KRT18, PSME3, SSR4
		MF00179:Extracellular_matrix_structural_protein	0.00494279	FBLN1, COL4A2, STAB1, FBLN2, LTBP4, FBN1, MGP, FBN3, MEGF6
		MF00040:Cell_adhesion_molecule	0.00609349	ITGAL, MEGF8, TNXB, BCAR1, EFEMP2, LTBP4, FBN1, EFEMP1, VTN, CELSR2, ITGB1, MAGED1, FBLN1, FBLN2, FBLN5, CD81, FBN3, SSX2IP, FN1
		MF00091:Cytoskeletal_protein	0.00652773	GFAP, LIMS2, LMNB1, PDLIM5, BCAR1, VIM, TUBB2C, LPXN, SORBS3, DES, KIF7, SORBS2, KRT8, RSPH3, NEFL, NEFM, MLLT4, PARVG, FMNL1, INF2, OBSCN, KIF17, ACTN1, SYNPO2, ACTN2, SEPT10, CORO1B, KRT19, KRT18, CFL1, TGFB1I1
		MF00229:Extracellular_matrix_linker_protein	0.0126264	LAMB2, LAMC3, LAMA5, MEGF6, FN1
	PANTHER_PATHWAY	P00034:Integrin_signalling_pathway	0.0468088	ITGAL, COL4A2, LIMS2, GRB2, BCAR1, ITGB4, ACTN1, ACTN2, TRIM23, ITGB1, LAMB2, LAMC3, LAMA5, MAPK7, TGFB1I1, PIK3R1, FN1
	PFAM	PF07645:EGF_CA	2.0119e-11	MEGF8, SVEP1, EGFL7, NELL1, EFEMP2, LTBP4, FBN1, EFEMP1, NELL2, JAG2, NID1, NID2, NOTCH1, FBLN1, FBLN2, FBLN5, FBN3, MEGF6
		PF00008:EGF	1.83685e-09	SVEP1, LTBP4, FBN1, JAG2, BCAN, NID1, CELSR2, NID2, SLIT1, SLIT2, SLIT3, NOTCH1, STAB1, VCAN, FBN3, AGRN, C9ORF30, NCAN, MEGF6, THBS1
		PF07974:EGF_2	8.80121e-05	MEGF8, TNXB, SVEP1, EGFL7, STAB1, NELL1, FBN1, NELL2, ITGB4, MEGF6, ITGB1
		PF04732:Intermediate_filament_head	0.000403298	GFAP, DES, VIM, NEFL, NEFM
		PF04732:Filament_head	0.000741214	GFAP, DES, VIM, NEFL, NEFM
		PF07974:EGF-like_domain	0.00137178	SVEP1, EGFL7, STAB1, NELL1, FBN1, NELL2, ITGB4, MEGF6
		PF00053:Laminin_EGF	0.00139459	MEGF8, LAMB2, LAMC3, STAB1, LAMA5, CELSR2, AGRN, MEGF6
		PF00053:Laminin_EGF-like	0.0024629	MEGF8, LAMC3, STAB1, LAMA5, CELSR2, AGRN, MEGF6
		PF00038:Intermediate_filament_protein	0.00432212	GFAP, KRT19, DES, KRT18, LMNB1, KRT8, VIM, NEFL, NEFM
		PF00038:Filament	0.00588666	GFAP, KRT19, DES, KRT18, LMNB1, KRT8, VIM, NEFL, NEFM
	PIR_SUPERFAMILY	PIRSF002282:cytoskeletal_keratin	0.00693218	GFAP, KRT19, DES, KRT18, LMNB1, KRT8, VIM, NEFL, NEFM
	PROSITE	PS00022:EGF_1	3.88752e-15	MEGF8, C7, LTBP4, NELL1, NELL2, ITGB4, JAG2, BCAN, ITGB1, LAMB2, FBN3, AGRN, THBS1, FN1, TNXB, SVEP1, EGFL7, EFEMP2, FBN1, EFEMP1, NID1, CELSR2, NID2, SLIT1, SLIT2, SLIT3, FBLN1, NOTCH1, LAMC3, LAMA5, STAB1, FBLN2, FBLN5, VCAN, C9ORF30, NCAN, MEGF6
		PS01186:EGF_2	3.88752e-15	MEGF8, C7, LTBP4, NELL1, NELL2, ITGB4, JAG2, BCAN, ITGB1, LAMB2, FBN3, AGRN, THBS1, FN1, TNXB, SVEP1, EGFL7, EFEMP2, FBN1, EFEMP1, NID1, CELSR2, NID2, SLIT1, SLIT2, SLIT3, FBLN1, NOTCH1, LAMC3, LAMA5, STAB1, FBLN2, FBLN5, VCAN, C9ORF30, NCAN, MEGF6
		PS01187:EGF_CA	1.0816e-14	MEGF8, SVEP1, EGFL7, NELL1, EFEMP2, LTBP4, FBN1, EFEMP1, NELL2, JAG2, NID1, NID2, SLIT1, SLIT2, SLIT3, FBLN1, NOTCH1, FBLN2, FBLN5, VCAN, FBN3, NCAN, MEGF6
		PS01187:Calcium-binding_EGF-like_domain_signature.	1.23235e-14	MEGF8, SVEP1, EGFL7, NELL1, EFEMP2, LTBP4, FBN1, NELL2, NID1, NID2, SLIT1, SLIT2, SLIT3, FBLN1, NOTCH1, FBLN2, FBLN5, VCAN, FBN3, NCAN, MEGF6
		PS00010:ASX_HYDROXYL	1.64313e-14	MEGF8, SVEP1, EGFL7, NELL1, EFEMP2, LTBP4, FBN1, EFEMP1, NELL2, JAG2, NID1, CELSR2, NID2, SLIT1, SLIT2, FBLN1, NOTCH1, FBLN2, FBLN5, VCAN, FBN3, NCAN, MEGF6
		PS00010:Aspartic_acid_and_asparagine_hydroxylation_site.	2.9643e-14	MEGF8, SVEP1, EGFL7, NELL1, EFEMP2, LTBP4, FBN1, NELL2, NID1, CELSR2, NID2, SLIT1, SLIT2, FBLN1, NOTCH1, FBLN2, FBLN5, VCAN, FBN3, NCAN, MEGF6
		PS01186:EGF-like_domain_signature_2.	1.48215e-13	C7, MEGF8, LTBP4, NELL1, NELL2, ITGB4, BCAN, FBN3, AGRN, THBS1, TNXB, SVEP1, EGFL7, EFEMP2, FBN1, CELSR2, NID1, NID2, SLIT1, SLIT2, SLIT3, FBLN1, NOTCH1, LAMC3, FBLN2, STAB1, FBLN5, VCAN, C9ORF30, MEGF6, NCAN
		PS50026:EGF-like_domain_profile.	3.59934e-13	C7, MEGF8, LTBP4, NELL1, NELL2, BCAN, FBN3, AGRN, THBS1, TNXB, SVEP1, EGFL7, EFEMP2, FBN1, CELSR2, NID1, NID2, SLIT1, SLIT2, SLIT3, FBLN1, NOTCH1, FBLN2, STAB1, FBLN5, VCAN, C9ORF30, MEGF6, NCAN
		PS00022:EGF-like_domain_signature_1.	1.93729e-11	C7, MEGF8, NELL1, LTBP4, NELL2, ITGB4, BCAN, ITGB1, AGRN, THBS1, FN1, SVEP1, TNXB, EGFL7, FBN1, CELSR2, NID1, SLIT1, SLIT2, SLIT3, NOTCH1, LAMC3, LAMA5, STAB1, VCAN, MEGF6, NCAN, C9ORF30
		PS01248:EGF_LAM_1	0.00115295	MEGF8, LAMB2, LAMC3, STAB1, LAMA5, CELSR2, AGRN, MEGF6
		PS00226:Intermediate_filaments_signature.	0.00536597	GFAP, KRT19, DES, KRT18, LMNB1, KRT8, VIM, NEFL, NEFM
		PS50002:Src_homology_3_(SH3)_domain_profile.	0.00574013	OBSCN, TP53BP2, GRB2, BCAR1, ARHGEF6, RUSC2, BZRAP1, TRIO, PPP1R13L, SORBS3, SORBS2, UBASH3A, BIN1, PIK3R1
		PS00226:IF	0.00595906	GFAP, KRT19, DES, KRT18, LMNB1, KRT8, VIM, NEFL, NEFM
		PS50027:Laminin-type_EGF-like_(LE)_domain_profile.	0.00606144	MEGF8, LAMC3, STAB1, LAMA5, CELSR2, AGRN
		PS01248:Laminin-type_EGF-like_(LE)_domain_signature.	0.00761677	MEGF8, LAMC3, STAB1, LAMA5, CELSR2, AGRN
		PS01185:C-terminal_cystine_knot_signature.	0.0147563	VWF, CTGF, SLIT1, SLIT2, SLIT3
		PS50963:Link_domain_profile.	0.0287912	STAB1, BCAN, VCAN, NCAN
		PS01241:Link_domain_signature.	0.0287912	STAB1, BCAN, VCAN, NCAN
		PS01208:VWFC_1	0.0400968	VWF, CTGF, NELL1, NELL2, JAG2, THBS1
		PS51162:Thyroglobulin_type-1_domain_profile.	0.042765	SPOCK3, TACSTD2, NID1, NID2
		PS00484:Thyroglobulin_type-1_repeat_signature.	0.042765	SPOCK3, TACSTD2, NID1, NID2
		PS01225:C-terminal_cystine_knot_domain_profile.	0.0445218	VWF, CTGF, SLIT1, SLIT2, SLIT3
		PS01185:CTCK_1	0.0445218	VWF, CTGF, SLIT1, SLIT2, SLIT3
	REACTOME_PATHWAY	REACT_13552:Integrin_cell_surface_interactions	1.86529e-05	ITGAL, COL4A2, GRB2, BCAR1, FBN1, ITGB4, VTN, ITGB1, VWF, LAMB2, LAMA5, LAMC3, THBS1, FN1
		REACT_604:Hemostasis	0.00895847	ITGAL, TF, GRB2, BCAR1, ACTN1, ACTN2, SERPING1, ITGB1, PFN1, VWF, GNB2, SERPINF2, CFL1, SERPINC1, TMSB4X, THBS1, PIK3R1, FN1
	SMART	SM00179:EGF_CA	4.10783e-14	MEGF8, EGFL7, NELL1, EFEMP2, LTBP4, FBN1, EFEMP1, NELL2, JAG2, NID1, CELSR2, NID2, SLIT1, SLIT2, SLIT3, FBLN1, NOTCH1, FBLN2, FBLN5, VCAN, FBN3, NCAN, MEGF6
		SM00181:EGF	1.16354e-11	MEGF8, NELL1, LTBP4, NELL2, JAG2, BCAN, FBN3, AGRN, THBS1, SVEP1, TNXB, EGFL7, EFEMP2, FBN1, CELSR2, NID1, NID2, SLIT1, SLIT2, SLIT3, FBLN1, NOTCH1, FBLN2, STAB1, VCAN, C9ORF30, MEGF6, NCAN
		SM00180:EGF_Lam	0.00249073	MEGF8, LAMB2, LAMC3, STAB1, LAMA5, CELSR2, AGRN, MEGF6
		SM00282:LamG	0.00348058	LAMA5, NELL1, NELL2, CELSR2, AGRN, SLIT1, SLIT2, SLIT3
	SP_PIR_KEYWORDS	phosphoprotein	1.67145e-18	VAPB, PDLIM5, RUSC2, TUBB2C, MAGED1, HOMER3, APOE, GAB1, LRRC7, ZHX3, CEP152, KRT19, KRT18, TACSTD2, JUN, RAB14, ZZZ3, TGFB1I1, MAPK7, C9ORF30, BIN1, DEAF1, LMNB1, PRRC1, ACP1, XAB2, PFN1, FAM65A, CCDC86, TP53BP2, TGFBR1, ASXL1, CREBBP, CDC23, TRIO, NDC80, ARFIP1, DDX5, SEPT10, SYNE1, NOTCH1, YY1AP1, RPL18A, NUP62, RABEP1, LAMA5, PARP4, BCKDK, GFAP, LZTS2, BCAR1, NAP1L1, USP19, CEP250, SHARPIN, A…
		egf-like_domain	3.26042e-15	C7, MEGF8, LTBP4, NELL1, NELL2, JAG2, BCAN, FBN3, AGRN, THBS1, TNXB, SVEP1, EGFL7, EFEMP2, FBN1, EFEMP1, NID1, CELSR2, NID2, SLIT1, SLIT2, SLIT3, FBLN1, NOTCH1, FBLN2, STAB1, FBLN5, VCAN, C9ORF30, NCAN, MEGF6
		host-virus_interaction	6.43186e-12	VAPB, GRB2, VIM, TBP, ITGB1, SF3B2, PSMB4, TNFRSF1A, APOA2, HNRNPK, KRT8, PIK3R1, TAF1, CCDC86, CREB3, CREBBP, TP53, YWHAE, PSMB8, STAT3, PSMB9, FBLN1, KRT19, KRT18, EP300, CD209, CD81, HSPD1, BIN1, KPNA1
		cytoplasm	5.98158e-09	CRABP1, RBM4, RUSC2, UBQLN4, UBQLN1, MAGED1, HOMER3, PRKACA, LRRC7, PABPN1, RINT1, PICK1, BCL2A1, ACTN1, RAI14, ACTN2, CEP152, PNPLA8, UXT, KRT18, PSMA6, PDE4DIP, MAPK7, TGFB1I1, BIN1, MVP, DEAF1, TRAF2, LRRCC1, ACP1, PSMB4, PFN1, HNRNPK, DDX3Y, NDRG1, UBASH3A, STRBP, AXIN1, EEF1A1, OBSCN, TP53BP2, SMEK2, SMYD3, TRIO, RGNEF, SEPT10, PSMB8, PSMB9, CORO1B, SYNE1, YY1AP1, CDKN1A, NUP62, RABEP1, SMUR…
		coiled_coil	1.33996e-07	LZTS2, GFAP, VAPA, VAPB, VPS52, CCDC37, MMRN2, TMF1, CCHCR1, DES, CEP250, HOMER3, RSPH3, INO80E, GOLGA2, PABPN1, EGFL7, BEND5, KIF17, RINT1, RAI14, USHBP1, CEP152, NUCB1, KRT19, KRT18, LAMC3, CCDC52, PDE4DIP, C9ORF30, BIN1, TRIOBP, TRAF2, SDCCAG8, CEP120, LMNB1, VIM, LRRCC1, CALCOCO2, FBF1, FAM65A, LAMB2, CCDC66, CEP57, MORC4, KIF7, KRT8, THAP1, CCDC21, SSX2IP, NEFL, TRIP11, MLLT4, NEFM, INF2, CC…
		extracellular_matrix	1.03926e-06	COL4A2, TNXB, SPOCK3, LTBP4, FBN1, BCAN, NID1, NID2, MMRN2, VWF, FBLN1, LAMB2, LAMC3, CTGF, FBLN2, LAMA5, VCAN, FBN3, AGRN, FN1, SPON1
		acetylation	8.43878e-06	MORF4L1, BCKDK, HIST4H4, VAPA, VAPB, FIGNL1, PDLIM5, BCAR1, TUBB2C, NAP1L1, UBQLN4, UBQLN1, PTMA, MBP, TMF1, CSNK2A1, CEP250, ANKRD12, EIF1, HIST3H2BB, AHNAK, PABPN1, KHDRBS1, BEND5, PTPRN2, ARHGEF6, TP53, SECISBP2, ACTN1, TAF11, KRT19, EP300, KRT18, ANKRD28, PSMA6, GNB2, PKM2, CFL1, RAB14, ZZZ3, PSME3, TMSB4X, MAPK7, XRN2, MVP, GLRX3, TRAF2, YWHAZ, LMNB1, GRB2, VIM, SNX4, ACP1, XAB2, ITGB1, ARNT…
		Secreted	2.72457e-05	AEBP1, NELL1, LTBP4, NELL2, BCAN, VTN, MMRN2, B2M, ST3GAL1, CFP, AZGP1, APOA2, CTGF, APOE, IGLL1, LTF, SPON1, EGFL7, MGP, SERPING1, SLIT1, SLIT2, SLIT3, LAMC3, SERPINF2, GRN, VCAN, DEAF1, TF, C7, SPOCK3, ISLR, TNFRSF1A, LAMB2, AGT, SERPINC1, FBN3, AGRN, FN1, COL4A2, SVEP1, TNXB, EFEMP2, EFEMP1, FBN1, CSNK2B, CD5L, NID1, NID2, FUCA2, VWF, FBLN1, SRPX2, FBLN2, LAMA5, CD209, FBLN5, ZG16, SFRP4, MEGF6
		cytoskeleton	7.1792e-05	ITGAL, TRIOBP, SDCCAG8, LZTS2, CEP120, LRRCC1, ITGB4, CALCOCO2, PFN1, SORBS3, CEP57, CEP250, TRIP11, PARVG, CEP192, SMEK2, ACTN1, RAI14, CEP63, SEPT10, CEP152, UXT, CORO1B, SYNE1, NUP62, CEP68, CFL1, TMSB4X, PDE4DIP, PARP4, TGFB1I1
		polymorphism	0.000337495	VAPA, PDLIM5, LTBP4, NELL1, NELL2, RUSC2, MAGED1, CFP, CTGF, HOMER3, APOE, RSPH3, GAB1, IGLL1, LRRC7, RINT1, ZHX3, USHBP1, SERPING1, CEP152, KRT19, KRT18, LAMC3, SERPINF2, TACSTD2, JUN, RAB14, ZZZ3, PDE4DIP, MAPK7, TGFB1I1, C9ORF30, FBXL2, LMNB1, ACP1, XAB2, CD68, LAMB2, UBASH3A, AGRN, CCDC86, TGFBR1, ASXL1, ROGDI, CDC23, TRIO, CD5L, NDC80, CELSR2, DLAT, DDX5, SEPT10, SYNE1, NOTCH1, YY1AP1, NUP62…
		alternative_splicing	0.000355738	MORF4L1, VAPA, VAPB, LTBP4, RBM4, JAG2, TBP, UBQLN1, MAGED1, HOMER3, CTGF, ATF6B, RSPH3, GAB1, PRKACA, LRRC7, RNF31, PABPN1, BEND5, PTPRN2, BEND7, USHBP1, RAI14, TATDN1, CEP152, PNPLA8, ZZZ3, PDE4DIP, TGFB1I1, MAPK7, C9ORF30, BIN1, FLAD1, XRN2, DEAF1, ITGAL, TRAF2, ELAC2, GRB2, LRRCC1, ITGB4, PRRC1, ACP1, ITGB1, TMEM63B, ARNT, FAM65A, CD68, HNRNPK, UBASH3A, STRBP, SSX2IP, CCDC21, DNAJA3, FN1, AXI…
		cell_adhesion	0.000355925	PARVG, ITGAL, TNXB, SVEP1, BCAR1, ITGB4, NID1, VTN, NID2, ITGB1, VWF, SORBS3, LAMB2, LAMC3, CTGF, LAMA5, CD209, FBLN5, SSX2IP, THBS1, MLLT4, FN1, SPON1
		nucleus	0.000391657	MORF4L1, RBM4, UBQLN4, TBP, UBQLN1, ATF6B, PRKACA, PABPN1, SECISBP2, ZHX3, TATDN1, UXT, EP300, HOXD8, PSMA6, JUN, ZZZ3, PDE4DIP, MAPK7, TGFB1I1, BIN1, XRN2, MVP, DEAF1, ELAC2, LMNB1, XAB2, ARNT, PSMB4, HNRNPK, CENPC1, DDX3Y, NDRG1, TAF9, UBASH3A, SSX2IP, TAF1, CCDC86, ZMYM2, NFE2, TP53BP2, CINP, CREBBP, ASXL1, SMEK2, SMYD3, NR4A1, NDC80, DDX5, PSMB8, PSMB9, SYNE1, NOTCH1, YY1AP1, CDKN1A, NUP62, H…
		laminin_egf-like_domain	0.0004063	MEGF8, LAMB2, LAMC3, STAB1, LAMA5, CELSR2, AGRN
		methylation	0.00091684	KHDRBS1, PABPN1, EEF1A1, TF, HIST4H4, CREBBP, TP53, DDX5, MBP, EP300, HNRNPK, RAB14, HIST3H2BB, SETD2, GAPDH, GBP2
		Intermediate_filament	0.00195525	GFAP, KRT19, DES, KRT18, LMNB1, KRT8, VIM, NEFL, NEFM
		sh3_domain	0.002705	OBSCN, TP53BP2, GRB2, BCAR1, ARHGEF6, RUSC2, BZRAP1, TRIO, PPP1R13L, SORBS3, SORBS2, UBASH3A, BIN1, PIK3R1
		disulfide_bond	0.00376603	LTBP4, NELL1, NELL2, JAG2, BCAN, VTN, MMRN2, OS9, B2M, CFP, ST3GAL1, AZGP1, APOA2, CTGF, LTF, IGLL1, SPON1, EGFL7, MGP, SERPING1, SLIT1, SLIT2, SLIT3, TACSTD2, SERPINF2, LAMC3, GRN, CD81, GAA, VCAN, CTSB, C9ORF30, NCAN, MEGF8, TF, C7, ITGAL, SPOCK3, ITGB4, ITGB1, ISLR, TNFRSF1A, CD68, LAMB2, AGT, SERPINC1, FBN3, AGRN, THBS1, FN1, OBSCN, TAF1, COL4A2, SVEP1, TNXB, EFEMP2, TGFBR1, FBN1, EFEMP1, CSN…
		cell_cycle	0.00547498	KHDRBS1, TAF1, LZTS2, TP53BP2, RINT1, CINP, TP53, LRRCC1, CDC23, NDC80, CEP63, SEPT10, CDKN1A, KRT18, EP300, CEP250, UBA3, PSME3, THAP1, SIAH1, MAPK7
		plasma	0.005655	CFP, TF, VWF, APOA2, APOE, SERPINF2, AGT, SERPINC1, FN1
		calcium	0.00574523	ITGAL, MEGF8, FKBP7, SPOCK3, JAG2, FBN3, THBS1, SVEP1, EGFL7, EFEMP2, EFEMP1, FBN1, ACTN1, NID1, CELSR2, ACTN2, NID2, NUCB1, CADPS, PLSCR1, FBLN1, NOTCH1, CADPS2, FBLN2, FBLN5, CD209, VCAN, NCAN, RCN3, MEGF6
		disease_mutation	0.00912414	DEAF1, TRIOBP, TF, C7, GFAP, ELAC2, VAPB, ITGB4, TBP, B2M, CFP, TNFRSF1A, DES, LAMB2, APOE, AGT, MPDU1, KRT8, SERPINC1, IGLL1, THAP1, NEFL, PIK3R1, AXIN1, FN1, PABPN1, TBXAS1, TGFBR1, EFEMP2, CREBBP, FBN1, EFEMP1, TP53, SECISBP2, ACTN2, SERPING1, STAT3, VWF, EP300, KRT18, NUP62, SRPX2, SERPINF2, FBLN5, GAA, JAK2, HSPD1, BIN1
		basement_membrane	0.0108903	COL4A2, LAMB2, LAMC3, LAMA5, NID1, NID2
		signal	0.0110987	AEBP1, LTBP4, NELL1, NELL2, JAG2, BCAN, VTN, MMRN2, OS9, B2M, CFP, AZGP1, APOA2, CTGF, APOE, LTF, IGLL1, DPP7, SPON1, EGFL7, PTPRN2, MGP, SERPING1, SLIT1, SLIT2, SLIT3, NUCB1, TACSTD2, SERPINF2, LAMC3, GRN, GAA, VCAN, CTSB, C9ORF30, NCAN, MEGF8, TF, C7, ITGAL, FKBP7, SPOCK3, ITGB4, FXYD6, ITGB1, ISLR, TNFRSF1A, CD68, LAMB2, AGT, LRRTM1, SERPINC1, FBN3, AGRN, THBS1, FN1, COL4A2, SVEP1, TNXB, EFEMP…
		differentiation	0.0114748	ZNF281, OBSCN, EGFL7, MGP, DOCK7, CBY1, RGNEF, SLIT1, SLIT2, SLIT3, CCHCR1, NOTCH1, FAM120B, SFRP4, SIAH1, PRM1, STRBP, MAPK7, TGFB1I1, BIN1
		isopeptide_bond	0.0301989	HIST4H4, NFE2, CREBBP, TP53, GON4L, PFN1, VWF, YY1AP1, HNRNPK, PSMA6, SERPINF2, TRAF3IP3, HIVEP2, HIST3H2BB, SSR4, FN1
		cell_binding	0.0322139	VWF, COL4A2, LAMB2, NID1
		duplication	0.0402499	TNFRSF1A, TF, VWF, TAF1, APOE, HIVEP2, LTF, ACTN1, ACTN2, DLAT, ITGB1, FN1
		proteasome	0.0425601	PSMB4, PSMA6, PSME3, UBQLN1, PSMB8, PSMB9
		sushi	0.0425601	C7, SVEP1, SRPX2, BCAN, VCAN, NCAN
		proteinase	0.0434159	PSMB4, PSMA6, PSMB8, PSMB9
Genotype 2A	Category	Term	Benjamini	Genes
2A	COG_ONTOLOGY	Cell_division_and_chromosome_partitioning	0.00325191	SDCCAG8, CCDC88C, UTRN, ITSN2, TRIP11, DST, PIK3R1
	GOTERM_CC_FAT	GO:0034361~very-low-density_lipoprotein_particle	0.00201567	APOB, APOA1, APOE, APOA5, APOH
		GO:0034385~triglyceride-rich_lipoprotein_particle	0.00201567	APOB, APOA1, APOE, APOA5, APOH
		GO:0034358~plasma_lipoprotein_particle	0.00671415	APOB, APOA1, APOE, APOA5, APOH
		GO:0032994~protein-lipid_complex	0.00671415	APOB, APOA1, APOE, APOA5, APOH
		GO:0042627~chylomicron	0.00738743	APOB, APOE, APOA5, APOH
		GO:0005815~microtubule_organizing_center	0.0167619	SDCCAG8, ROCK1, PCNT, SLMAP, NPM1, PCM1, CEP63, IFT88, CTNNB1
		GO:0034364~high-density_lipoprotein_particle	0.0287172	APOA1, APOE, APOA5, APOH
		GO:0005813~centrosome	0.0291742	SDCCAG8, ROCK1, PCNT, SLMAP, NPM1, PCM1, CEP63, CTNNB1
		GO:0015630~microtubule_cytoskeleton	0.0302697	AKT1, SDCCAG8, ROCK1, PCNT, SLMAP, NPM1, PCM1, CEP63, DST, IFT88, CTNNB1, MYCBP2
		GO:0005829~cytosol	0.0340491	SDCCAG8, ROCK1, PCNT, CEP63, PCM1, TCF7L2, CTNNB1, AKT1, PDPK1, RILPL2, GSK3A, GSK3B, SLMAP, NUCB2, NPM1, VPS35, AHSA1, PIK3R1, HSPA8, SPTAN1
		GO:0019898~extrinsic_to_membrane	0.0425801	MPHOSPH9, PDPK1, ATXN2L, ROCK1, TSG101, APOE, NUCB2, VPS35, TRIP11, CTNNB1, GOLGA2
		GO:0005615~extracellular_space	0.0445726	TF, C4A, C3, NUCB1, APOB, LOC100133511, APOA1, FGB, APOE, NUCB2, APOA5, CFH, APOH, FN1
	GOTERM_MF_FAT	GO:0005543~phospholipid_binding	0.00578013	AKT1, APOB, APOA1, SNX14, APOE, APOA5, APOH, PIK3R1
		GO:0070325~lipoprotein_receptor_binding	0.00763056	APOB, APOA1, APOE, APOA5
		GO:0019899~enzyme_binding	0.00784627	ROCK1, TCF7L2, CBX5, CTNNB1, AKT1, APOB, PDPK1, APOA1, CUL7, GSK3A, GSK3B, APOA5, PIK3R1
		GO:0008201~heparin_binding	0.0088451	APOB, APOE, APOA5, APOH, HRG, SERPIND1, FN1
		GO:0005539~glycosaminoglycan_binding	0.00973446	APOB, APOE, APOA5, APOH, HRG, SERPIND1, FN1
		GO:0030247~polysaccharide_binding	0.0135581	APOB, APOE, APOA5, APOH, HRG, SERPIND1, FN1
		GO:0001871~pattern_binding	0.0135581	APOB, APOE, APOA5, APOH, HRG, SERPIND1, FN1
	INTERPRO	IPR013326:Apolipoprotein/apolipophorin	0.0413726	APOA1, APOE, APOA5
		IPR000074:Apolipoprotein_A1/A4/E	0.0413726	APOA1, APOE, APOA5
	KEGG_PATHWAY	hsa05213:Endometrial_cancer	0.00237466	AKT1, PDPK1, GSK3B, TCF7L2, PIK3R1, CTNNB1
		hsa05215:Prostate_cancer	0.0155054	AKT1, PDPK1, GSK3B, TCF7L2, PIK3R1, CTNNB1
		hsa04610:Complement_and_coagulation_cascades	0.0364233	LOC100133511, C4A, C3, FGB, CFH, SERPIND1
		hsa05210:Colorectal_cancer	0.0449634	AKT1, GSK3B, TCF7L2, PIK3R1, CTNNB1
	PANTHER_MF_ALL	MF00088:Apolipoprotein	0.0008384	APOB, APOA1, APOE, APOA5, APOH
	PANTHER_PATHWAY	P04398:p53_pathway_feedback_loops_2	0.0161447	AKT1, PDPK1, MAPK12, PIK3R1, CTNNB1
		P04393:Ras_Pathway	0.01668	AKT1, PDPK1, MAPK12, GSK3A, GSK3B
		P00033:Insulin/IGF_pathway-protein_kinase_B_signaling_cascade	0.0204068	AKT1, PDPK1, GSK3A, GSK3B, PIK3R1
		P00005:Angiogenesis	0.0254719	AKT1, MAPK12, GSK3A, GSK3B, TCF7L2, PIK3R1, CTNNB1
		P00048:PI3_kinase_pathway	0.0326855	AKT1, PDPK1, GSK3A, GSK3B, PIK3R1
	SP_PIR_KEYWORDS	phosphoprotein	3.29029e-09	COPS2, TSG101, COPS3, UTRN, IQGAP2, PDIA6, ZNF638, ITSN2, CBX5, CTNNB1, AKT1, N4BP2L2, PDPK1, APOB, APOA1, CUL7, APOE, SLMAP, ANKRD50, DDX24, APOA5, RBM10, GOLGA2, ROCK1, GATM, CCDC88C, KTN1, CDK6, OPTN, PCM1, FAM123B, NUCB1, EIF4G2, IPO4, NUCB2, DST, TF, C3, WBP11, CIC, TCF7L2, TPM4, MYCBP2, ATXN2L, LOC100133511, CCDC66, AGGF1, DDX3X, GORASP2, NPM1, GATAD2A, VPS35, TRIP11, HSPA8, PIK3R1, FN1, PC…
		plasma	5.89579e-09	TF, APOB, LOC100133511, APOA1, C4A, C3, FGB, APOE, MST1, APOH, SERPIND1, FN1
		coiled_coil	4.98035e-06	SDCCAG8, STX8, TSG101, CALCOCO2, WBP11, ITSN2, TPM4, N4BP2L2, CCDC66, RILPL2, AGGF1, FGB, SLMAP, APOA5, GATAD2A, TRIP11, GOLGA2, ROCK1, CCDC88C, PCNT, KTN1, OPTN, CEP63, PCM1, TRIM62, NUCB1, MPHOSPH9, SRFBP1, MYH14, SMC1A, DST
		cytoplasm	1.27694e-05	COPS2, SDCCAG8, TSG101, COPS3, UTRN, CALCOCO2, WBP11, ITSN2, TPM4, CTNNB1, AKT1, PDPK1, RILPL2, CUL7, DDX3X, AGGF1, SLMAP, EIF3L, VPS35, TRIP11, HSPA8, GATM, ROCK1, PAIP1, PCNT, ELAVL1, OPTN, CEP63, PCM1, FAM123B, NUCB1, MAPK12, SRFBP1, IPO4, NUCB2, SCP2, AHSA1, DST, SPTAN1, ADAR
		acetylation	0.000237047	TSG101, COPS3, IQGAP2, WBP11, TPM4, MYCBP2, APOB, PDPK1, ATXN2L, DDX3X, AGGF1, SLMAP, NPM1, DDX24, EIF3L, RBM10, PIK3R1, HSPA8, ROCK1, GATM, CDK6, EHMT2, DDX5, PCM1, EIF4G2, ZNF195, IPO4, MYH14, SMC1A, SCP2, AHSA1, SPTAN1
		polymorphism	0.000267684	SPG7, HMGCR, TSG101, GREB1, GPR81, UTRN, IQGAP2, PDIA6, ITSN2, ZNF638, CTNNB1, AKT1, N4BP2L2, APOB, APOA1, CUL7, APOE, APOA5, DDX24, APOH, CFH, RBM10, GOLGA2, ROCK1, GATM, C4A, CCDC88C, KTN1, CDK6, OPTN, PCM1, FAM123B, NUCB1, EIF4G2, TNFRSF10B, IPO4, NUCB2, DST, IFT88, GATC, TF, SDCCAG8, GLRX5, C3, MST1, CALCOCO2, CIC, TCF7L2, TPM4, MYCBP2, LOC100133511, CCDC66, DDX3X, AGGF1, FGB, GORASP2, RNASET…
		heparin-binding	0.000633871	APOB, APOE, APOH, HRG, SERPIND1, FN1
		chylomicron	0.000713782	APOB, APOE, APOA5, APOH
		vldl	0.000737417	APOB, APOE, APOA5, APOH
		disease_mutation	0.0013129	TF, SPG7, C4A, C3, OPTN, CTNNB1, FAM123B, AKT1, APOB, APOA1, LOC100133511, CUL7, AGGF1, APOE, FGB, APOA5, CFH, SERPIND1, MYH14, SMC1A, PIK3R1, ADAR, FN1
		cytoskeleton	0.00216572	SDCCAG8, ROCK1, PCNT, UTRN, CALCOCO2, CEP63, PCM1, TPM4, CTNNB1, SLMAP, DST, TRIP11, SPTAN1
		hdl	0.00218615	APOA1, APOE, APOA5, APOH
		lipid_binding	0.00218615	APOB, APOA1, APOE, APOH
		lipid_transport	0.00534907	APOB, APOA1, APOE, APOA5, SCP2
		alternative_splicing	0.0129029	COPS2, SPG7, GREB1, TSG101, HMGCR, PDIA6, IQGAP2, ZNF638, ITSN2, CTNNB1, N4BP2L2, PDPK1, SLMAP, CFH, RBM10, GOLGA2, GATM, CCDC88C, KTN1, OPTN, PCM1, FAM123B, EIF4G2, TNFRSF10B, ZNF195, IPO4, NUCB2, IFT88, DST, SDCCAG8, SNX14, TCF7L2, TPM4, MYCBP2, ATXN2L, CCDC66, AGGF1, GORASP2, RNASET2, NPM1, GATAD2A, FBXO3, PIK3R1, HSPA8, FN1, PAIP1, NID1, EHMT2, CEP63, MPHOSPH9, PHF14, GSK3B, MYH14, SCP2, SPTA…
		ubl_conjugation	0.0137771	AKT1, CUL7, SNX14, TSG101, NPM1, KTN1, DST, TCF7L2, PIK3R1, CTNNB1, ADAR
		atherosclerosis	0.0142651	APOB, APOA1, APOE
		ATP	0.0184298	ROCK1, MAPK12, GSK3B, CDK6, MYH14, DDX5, HSPA8
		isopeptide_bond	0.0185095	CUL7, SNX14, NPM1, KTN1, DST, TCF7L2, FN1, ADAR
		sulfation	0.0210054	C4A, NID1, SERPIND1, FN1
		wnt_signaling_pathway	0.0424435	CCDC88C, GSK3B, TCF7L2, CTNNB1, FAM123B

## Sheet: SI Table 5C
SI Table 5C. Comparison of the enriched terms associated with the HCV genotypes 1a-, 1b-, and 2a-human interactomes. (Corresponds to Figs. 6B and C)
Genotype	Enriched term
1a Only	2.7.10.2
	Antiviral_defense
	Apoptosis
	BP00004:Carbohydrate_transport
	BP00060:Protein_metabolism_and_modification
	BP00062:Protein_folding
	BP00064:Protein_phosphorylation
	BP00073:Translational_regulation
	BP00111:Intracellular_signaling_cascade
	BP00148:Immunity_and_defense
	BP00179:Apoptosis
	BP00196:Oogenesis
	BP00207:Cell_cycle_control
	BP00224:Cell_proliferation_and_differentiation
	BP00253:Induction_of_apoptosis
	BP00265:Oncogene
	BP00281:Oncogenesis
	Chaperone
	DNA_binding
	GO:0000166~nucleotide_binding
	GO:0001775~cell_activation
	GO:0001836~release_of_cytochrome_c_from_mitochondria
	GO:0001882~nucleoside_binding
	GO:0001883~purine_nucleoside_binding
	GO:0003723~RNA_binding
	GO:0004672~protein_kinase_activity
	GO:0004713~protein_tyrosine_kinase_activity
	GO:0004715~non-membrane_spanning_protein_tyrosine_kinase_activity
	GO:0005524~ATP_binding
	GO:0005654~nucleoplasm
	GO:0005730~nucleolus
	GO:0005740~mitochondrial_envelope
	GO:0005783~endoplasmic_reticulum
	GO:0005788~endoplasmic_reticulum_lumen
	GO:0006457~protein_folding
	GO:0006461~protein_complex_assembly
	GO:0006468~protein_amino_acid_phosphorylation
	GO:0006793~phosphorus_metabolic_process
	GO:0006796~phosphate_metabolic_process
	GO:0006913~nucleocytoplasmic_transport
	GO:0006917~induction_of_apoptosis
	GO:0006919~activation_of_caspase_activity
	GO:0006955~immune_response
	GO:0006983~ER_overload_response
	GO:0006984~ER-nuclear_signaling_pathway
	GO:0007242~intracellular_signaling_cascade
	GO:0007243~protein_kinase_cascade
	GO:0007249~I-kappaB_kinase/NF-kappaB_cascade
	GO:0008035~high-density_lipoprotein_binding
	GO:0008283~cell_proliferation
	GO:0008629~induction_of_apoptosis_by_intracellular_signals
	GO:0008630~DNA_damage_response
	GO:0008633~activation_of_pro-apoptotic_gene_products
	GO:0008637~apoptotic_mitochondrial_changes
	GO:0009617~response_to_bacterium
	GO:0009967~positive_regulation_of_signal_transduction
	GO:0010557~positive_regulation_of_macromolecule_biosynthetic_process
	GO:0010605~negative_regulation_of_macromolecule_metabolic_process
	GO:0010608~posttranscriptional_regulation_of_gene_expression
	GO:0010627~regulation_of_protein_kinase_cascade
	GO:0010647~positive_regulation_of_cell_communication
	GO:0010740~positive_regulation_of_protein_kinase_cascade
	GO:0010885~regulation_of_cholesterol_storage
	GO:0010952~positive_regulation_of_peptidase_activity
	GO:0012502~induction_of_programmed_cell_death
	GO:0015918~sterol_transport
	GO:0016032~viral_reproduction
	GO:0016044~membrane_organization
	GO:0016310~phosphorylation
	GO:0017076~purine_nucleotide_binding
	GO:0017127~cholesterol_transporter_activity
	GO:0018108~peptidyl-tyrosine_phosphorylation
	GO:0018212~peptidyl-tyrosine_modification
	GO:0019062~virion_attachment_to_host_cell_surface_receptor
	GO:0019220~regulation_of_phosphate_metabolic_process
	GO:0019882~antigen_processing_and_presentation
	GO:0022415~viral_reproductive_process
	GO:0030260~entry_into_host_cell
	GO:0030301~cholesterol_transport
	GO:0030554~adenyl_nucleotide_binding
	GO:0031264~death-inducing_signaling_complex
	GO:0031663~lipopolysaccharide-mediated_signaling_pathway
	GO:0031967~organelle_envelope
	GO:0031974~membrane-enclosed_lumen
	GO:0031975~envelope
	GO:0031981~nuclear_lumen
	GO:0032496~response_to_lipopolysaccharide
	GO:0032553~ribonucleotide_binding
	GO:0032555~purine_ribonucleotide_binding
	GO:0032559~adenyl_ribonucleotide_binding
	GO:0033554~cellular_response_to_stress
	GO:0034097~response_to_cytokine_stimulus
	GO:0034381~lipoprotein_particle_clearance
	GO:0034384~high-density_lipoprotein_particle_clearance
	GO:0034621~cellular_macromolecular_complex_subunit_organization
	GO:0034622~cellular_macromolecular_complex_assembly
	GO:0034976~response_to_endoplasmic_reticulum_stress
	GO:0042110~T_cell_activation
	GO:0042127~regulation_of_cell_proliferation
	GO:0042592~homeostatic_process
	GO:0042632~cholesterol_homeostasis
	GO:0042803~protein_homodimerization_activity
	GO:0043085~positive_regulation_of_catalytic_activity
	GO:0043122~regulation_of_I-kappaB_kinase/NF-kappaB_cascade
	GO:0043123~positive_regulation_of_I-kappaB_kinase/NF-kappaB_cascade
	GO:0043233~organelle_lumen
	GO:0043280~positive_regulation_of_caspase_activity
	GO:0043281~regulation_of_caspase_activity
	GO:0043330~response_to_exogenous_dsRNA
	GO:0043331~response_to_dsRNA
	GO:0044093~positive_regulation_of_molecular_function
	GO:0044409~entry_into_host
	GO:0044432~endoplasmic_reticulum_part
	GO:0045121~membrane_raft
	GO:0045321~leukocyte_activation
	GO:0046718~entry_of_virus_into_host_cell
	GO:0048002~antigen_processing_and_presentation_of_peptide_antigen
	GO:0048878~chemical_homeostasis
	GO:0051082~unfolded_protein_binding
	GO:0051098~regulation_of_binding
	GO:0051099~positive_regulation_of_binding
	GO:0051169~nuclear_transport
	GO:0051173~positive_regulation_of_nitrogen_compound_metabolic_process
	GO:0051174~regulation_of_phosphorus_metabolic_process
	GO:0051259~protein_oligomerization
	GO:0051336~regulation_of_hydrolase_activity
	GO:0051345~positive_regulation_of_hydrolase_activity
	GO:0051346~negative_regulation_of_hydrolase_activity
	GO:0051726~regulation_of_cell_cycle
	GO:0051806~entry_into_cell_of_other_organism_during_symbiotic_interaction
	GO:0051828~entry_into_other_organism_during_symbiotic_interaction
	GO:0052126~movement_in_host_environment
	GO:0052192~movement_in_environment_of_other_organism_during_symbiotic_interaction
	GO:0052547~regulation_of_peptidase_activity
	GO:0052548~regulation_of_endopeptidase_activity
	GO:0055092~sterol_homeostasis
	GO:0065003~macromolecular_complex_assembly
	GO:0070013~intracellular_organelle_lumen
	GO:0070271~protein_complex_biogenesis
	IPR000488:Death
	IPR000719:Protein_kinase
	IPR000980:SH2_motif
	IPR001245:Tyrosine_protein_kinase
	IPR008266:Tyrosine_protein_kinase
	IPR011029:DEATH-like
	IPR017441:Protein_kinase
	MF00069:Ribonucleoprotein
	MF00107:Kinase
	MF00108:Protein_kinase
	MF00214:Non-receptor_tyrosine_protein_kinase
	P00006:Apoptosis_signaling_pathway
	P00049:Parkinson_disease
	P00059:p53_pathway
	PF00017:SH2
	PF00017:SH2_domain
	PF07714:Pkinase_Tyr
	PIRSF000601:tyrosine-protein_kinase
	PS00107:PROTEIN_KINASE_ATP
	PS00107:Protein_kinases_ATP-binding_region_signature.
	PS00109:PROTEIN_KINASE_TYR
	PS00109:Tyrosine_protein_kinases_specific_active-site_signature.
	PS50001:Src_homology_2_(SH2)_domain_profile.
	PS50011:Protein_kinase_domain_profile.
	PTHR23256~TYROSINE_PROTEIN_KINASE
	Proto-oncogene
	REACT_578:Apoptosis
	REACT_6900:Signaling_in_Immune_system
	SH2_domain
	SM00005:DEATH
	SM00219:TyrKc
	SM00252:SH2
	_ATP_binding_site
	_active_site
	_core
	_proto-oncogene_SRC_type
	_signal_transduction_resulting_in_induction_of_apoptosis
	activator
	atp-binding
	dna-binding
	h_ceramidePathway:Ceramide_Signaling_Pathway
	hsa04115:p53_signaling_pathway
	hsa04210:Apoptosis
	hsa04612:Antigen_processing_and_presentation
	hsa04620:Toll-like_receptor_signaling_pathway
	hsa04622:RIG-I-like_receptor_signaling_pathway
	hsa04650:Natural_killer_cell_mediated_cytotoxicity
	hsa05016:Huntington\\\'s_disease
	hsa05212:Pancreatic_cancer
	immune_response
	intestine
	kinase
	lipoprotein
	liver
	myristate
	myristylation
	nucleotide-binding
	palmitate
	phosphotransferase
	rna-binding
	transferase
	transmembrane_protein
	tyrosine-protein_kinase
	tyrosine-specific_protein_kinase
	viral_nucleoprotein
1a and 1b	GO:0006915~apoptosis
	GO:0008134~transcription_factor_binding
	GO:0008219~cell_death
	GO:0009611~response_to_wounding
	GO:0009891~positive_regulation_of_biosynthetic_process
	GO:0010033~response_to_organic_substance
	GO:0010604~positive_regulation_of_macromolecule_metabolic_process
	GO:0010941~regulation_of_cell_death
	GO:0010942~positive_regulation_of_cell_death
	GO:0012501~programmed_cell_death
	GO:0016265~death
	GO:0016563~transcription_activator_activity
	GO:0031328~positive_regulation_of_cellular_biosynthetic_process
	GO:0031399~regulation_of_protein_modification_process
	GO:0032268~regulation_of_cellular_protein_metabolic_process
	GO:0042802~identical_protein_binding
	GO:0042981~regulation_of_apoptosis
	GO:0043065~positive_regulation_of_apoptosis
	GO:0043067~regulation_of_programmed_cell_death
	GO:0043068~positive_regulation_of_programmed_cell_death
	GO:0043933~macromolecular_complex_subunit_organization
	GO:0046982~protein_heterodimerization_activity
	GO:0046983~protein_dimerization_activity
	GO:0048584~positive_regulation_of_response_to_stimulus
	host-virus_interaction
	hsa05200:Pathways_in_cancer
	methylation
	nucleus
	sh3_domain
1b Only	BP00201:Skeletal_development
	BP00275:Extracellular_matrix_protein-mediated_signaling
	BP00285:Cell_structure_and_motility
	BP00286:Cell_structure
	BP00287:Cell_motility
	COG1196:_Smc;_Chromosome_segregation_ATPases
	GO:0002039~p53_binding
	GO:0002526~acute_inflammatory_response
	GO:0003712~transcription_cofactor_activity
	GO:0003713~transcription_coactivator_activity
	GO:0005178~integrin_binding
	GO:0005198~structural_molecule_activity
	GO:0005200~structural_constituent_of_cytoskeleton
	GO:0005201~extracellular_matrix_structural_constituent
	GO:0005509~calcium_ion_binding
	GO:0005576~extracellular_region
	GO:0005578~proteinaceous_extracellular_matrix
	GO:0005604~basement_membrane
	GO:0005669~transcription_factor_TFIID_complex
	GO:0005856~cytoskeleton
	GO:0005912~adherens_junction
	GO:0005924~cell-substrate_adherens_junction
	GO:0005925~focal_adhesion
	GO:0006928~cell_motion
	GO:0007010~cytoskeleton_organization
	GO:0007049~cell_cycle
	GO:0007155~cell_adhesion
	GO:0007160~cell-matrix_adhesion
	GO:0008104~protein_localization
	GO:0009719~response_to_endogenous_stimulus
	GO:0009725~response_to_hormone_stimulus
	GO:0016023~cytoplasmic_membrane-bounded_vesicle
	GO:0016323~basolateral_plasma_membrane
	GO:0017048~Rho_GTPase_binding
	GO:0019900~kinase_binding
	GO:0019904~protein_domain_specific_binding
	GO:0022610~biological_adhesion
	GO:0030016~myofibril
	GO:0030017~sarcomere
	GO:0030018~Z_disc
	GO:0030036~actin_cytoskeleton_organization
	GO:0030055~cell-substrate_junction
	GO:0030141~secretory_granule
	GO:0030162~regulation_of_proteolysis
	GO:0031012~extracellular_matrix
	GO:0031091~platelet_alpha_granule
	GO:0031093~platelet_alpha_granule_lumen
	GO:0031099~regeneration
	GO:0031401~positive_regulation_of_protein_modification_process
	GO:0031410~cytoplasmic_vesicle
	GO:0031589~cell-substrate_adhesion
	GO:0031674~I_band
	GO:0031982~vesicle
	GO:0031983~vesicle_lumen
	GO:0031988~membrane-bounded_vesicle
	GO:0032270~positive_regulation_of_cellular_protein_metabolic_process
	GO:0032403~protein_complex_binding
	GO:0032535~regulation_of_cellular_component_size
	GO:0043228~non-membrane-bounded_organelle
	GO:0043232~intracellular_non-membrane-bounded_organelle
	GO:0043292~contractile_fiber
	GO:0044420~extracellular_matrix_part
	GO:0044421~extracellular_region_part
	GO:0044430~cytoskeletal_part
	GO:0044449~contractile_fiber_part
	GO:0048471~perinuclear_region_of_cytoplasm
	GO:0050840~extracellular_matrix_binding
	GO:0051247~positive_regulation_of_protein_metabolic_process
	GO:0051270~regulation_of_cell_motion
	GO:0060205~cytoplasmic_membrane-bounded_vesicle_lumen
	GO:0070161~anchoring_junction
	IPB000152:Aspartic_acid_and_asparagine_hydroxylation_site
	IPB001664:Intermediate_filament_protein
	IPB001881:EGF-like_calcium-binding
	IPR000152:EGF-type_aspartate/asparagine_hydroxylation_conserved_site
	IPR000742:EGF-like
	IPR001007:von_Willebrand_factor
	IPR001452:Src_homology-3_domain
	IPR001664:Intermediate_filament_protein
	IPR001791:Laminin_G
	IPR001881:EGF-like_calcium-binding
	IPR002049:EGF-like
	IPR006207:Cystine_knot
	IPR006209:EGF
	IPR006210:EGF-like
	IPR006821:Intermediate_filament
	IPR012680:Laminin_G
	IPR013032:EGF-like_region
	IPR013091:EGF_calcium-binding
	IPR013111:EGF
	IPR013320:Concanavalin_A-like_lectin/glucanase
	IPR016044:Filament
	IPR016060:Complement_control_module
	IPR018039:Intermediate_filament_protein
	IPR018097:EGF-like_calcium-binding
	Intermediate_filament
	MF00040:Cell_adhesion_molecule
	MF00091:Cytoskeletal_protein
	MF00178:Extracellular_matrix
	MF00179:Extracellular_matrix_structural_protein
	MF00180:Extracellular_matrix_glycoprotein
	MF00188:Select_calcium_binding_protein
	MF00197:Miscellaneous_function
	MF00219:Annexin
	MF00229:Extracellular_matrix_linker_protein
	P00034:Integrin_signalling_pathway
	PF00008:EGF
	PF00038:Filament
	PF00038:Intermediate_filament_protein
	PF00053:Laminin_EGF
	PF00053:Laminin_EGF-like
	PF04732:Filament_head
	PF04732:Intermediate_filament_head
	PF07645:EGF_CA
	PF07974:EGF-like_domain
	PF07974:EGF_2
	PIRSF002282:cytoskeletal_keratin
	PS00010:ASX_HYDROXYL
	PS00010:Aspartic_acid_and_asparagine_hydroxylation_site.
	PS00022:EGF-like_domain_signature_1.
	PS00022:EGF_1
	PS00226:IF
	PS00226:Intermediate_filaments_signature.
	PS00484:Thyroglobulin_type-1_repeat_signature.
	PS01185:C-terminal_cystine_knot_signature.
	PS01185:CTCK_1
	PS01186:EGF-like_domain_signature_2.
	PS01186:EGF_2
	PS01187:Calcium-binding_EGF-like_domain_signature.
	PS01187:EGF_CA
	PS01208:VWFC_1
	PS01225:C-terminal_cystine_knot_domain_profile.
	PS01241:Link_domain_signature.
	PS01248:EGF_LAM_1
	PS01248:Laminin-type_EGF-like_(LE)_domain_signature.
	PS50002:Src_homology_3_(SH3)_domain_profile.
	PS50026:EGF-like_domain_profile.
	PS50027:Laminin-type_EGF-like_(LE)_domain_profile.
	PS50963:Link_domain_profile.
	PS51162:Thyroglobulin_type-1_domain_profile.
	PTHR10574~LAMININ
	PTHR11201~EGF-LIKE_DOMAIN_PROTEIN
	PTHR23239~INTERMEDIATE_FILAMENT
	REACT_13552:Integrin_cell_surface_interactions
	REACT_604:Hemostasis
	SM00179:EGF_CA
	SM00180:EGF_Lam
	SM00181:EGF
	SM00282:LamG
	Secreted
	_C-terminal
	_DNA-binding_region
	_conserved_site
	_conserved_site
	_conserved_site
	_extracellular
	_laminin
	_subdomain_2
	_subgroup
	_type_3
	_type_C
	basement_membrane
	calcium
	cell_adhesion
	cell_binding
	cell_cycle
	differentiation
	disulfide_bond
	duplication
	egf-like_domain
	extracellular_matrix
	hsa04510:Focal_adhesion
	hsa04512:ECM-receptor_interaction
	hsa04520:Adherens_junction
	hsa04722:Neurotrophin_signaling_pathway
	hsa05211:Renal_cell_carcinoma
	hsa05222:Small_cell_lung_cancer
	laminin_egf-like_domain
	proteasome
	proteinase
	signal
	sushi
1b and 2a	Cell_division_and_chromosome_partitioning
	GO:0001871~pattern_binding
	GO:0005539~glycosaminoglycan_binding
	GO:0005813~centrosome
	GO:0005815~microtubule_organizing_center
	GO:0030247~polysaccharide_binding
	alternative_splicing
	coiled_coil
	cytoskeleton
	polymorphism
2a Only	GO:0005543~phospholipid_binding
	GO:0005615~extracellular_space
	GO:0008201~heparin_binding
	GO:0015630~microtubule_cytoskeleton
	GO:0019898~extrinsic_to_membrane
	GO:0032994~protein-lipid_complex
	GO:0034358~plasma_lipoprotein_particle
	GO:0034361~very-low-density_lipoprotein_particle
	GO:0034364~high-density_lipoprotein_particle
	GO:0034385~triglyceride-rich_lipoprotein_particle
	GO:0042627~chylomicron
	GO:0070325~lipoprotein_receptor_binding
	IPR000074:Apolipoprotein_A1/A4/E
	IPR013326:Apolipoprotein/apolipophorin
	MF00088:Apolipoprotein
	P00005:Angiogenesis
	P00033:Insulin/IGF_pathway-protein_kinase_B_signaling_cascade
	P00048:PI3_kinase_pathway
	P04393:Ras_Pathway
	P04398:p53_pathway_feedback_loops_2
	atherosclerosis
	chylomicron
	hdl
	heparin-binding
	hsa04610:Complement_and_coagulation_cascades
	hsa05210:Colorectal_cancer
	hsa05213:Endometrial_cancer
	lipid_binding
	lipid_transport
	sulfation
	vldl
	wnt_signaling_pathway
2a and 1a	ATP
	hsa05215:Prostate_cancer
	ubl_conjugation
All	acetylation
	GO:0005829~cytosol
	phosphoprotein
	isopeptide_bond
	cytoplasm
	GO:0019899~enzyme_binding
	disease_mutation
	plasma

## Sheet: SI Table 6A
SI Table 6A. DAVID enrichment analysis for the unique and shared targets of HCV Genotype 2a (Dolan et al) and DENV (Khadka et al). (Corresponds to Fig. 7B)
Category	Term	Count	Benjamini	Genes
HCV GT 2a Unique (Dolan et al)	Keywords	phosphoprotein	0.00127272	TF, C3, TSG101, COPS3, UTRN, PDIA6, IQGAP2, WBP11, ITSN2, ZNF638, CIC, TPM4, CBX5, N4BP2L2, ATXN2L, LOC100133511, APOE, GORASP2, SLMAP, APOA5, NPM1, GATAD2A, RBM10, PIK3R1, HSPA8, GATM, ROCK1, ELAVL1, OPTN, EHMT2, RLF, NUCB1, MPHOSPH9, PHF14, NUCB2, SMC1A, SCP2, ADAR
		plasma	0.00983381	TF, LOC100133511, C3, APOE, MST1, APOH
		vldl	0.0151518	APOE, APOA5, APOH
		acetylation	0.0187474	ROCK1, GATM, TSG101, COPS3, IQGAP2, WBP11, EHMT2, TPM4, ZNF195, ATXN2L, SLMAP, NPM1, EIF3L, RBM10, SMC1A, SCP2, PIK3R1, HSPA8
		polymorphism	0.0196754	TF, GLRX5, HMGCR, GREB1, TSG101, C3, GPR81, UTRN, MST1, PDIA6, IQGAP2, ZNF638, ITSN2, CIC, TPM4, N4BP2L2, LOC100133511, APOE, GORASP2, APOA5, CFH, GATAD2A, APOH, EIF3L, HRG, FBXO3, RBM10, HSPA8, PIK3R1, SESTD1, GATM, ROCK1, OPTN, EHMT2, CEP63, RLF, NUCB1, MPHOSPH9, PHF14, NUCB2, SMC1A, IFT88, SCP2, ADAR, GATC
		chylomicron	0.0210179	APOE, APOA5, APOH
		hdl	0.0216567	APOE, APOA5, APOH
		coiled coil	0.0227327	STX8, ROCK1, TSG101, WBP11, ITSN2, OPTN, CEP63, TPM4, NUCB1, MPHOSPH9, N4BP2L2, SLMAP, APOA5, GATAD2A, SMC1A
Comparison Set	Category	Term	Benjamini	Genes
HCV GT 2a (Dolan et al) ∩ DENV (Khadka et al)	COG NAME	COG1196: Smc; Chromosome segregation ATPases	0.0270324	SDCCAG8, CCDC88C, TRIP11, DST
	COG ONTOLOGY	Cell division and chromosome partitioning	0.0283263	SDCCAG8, CCDC88C, TRIP11, DST
	Keywords	plasma	0.000130724	APOB, APOA1, C4A, FGB, SERPIND1, FN1
		coiled coil	0.000138931	SDCCAG8, CCDC88C, PCNT, KTN1, CALCOCO2, PCM1, TRIM62, CCDC66, RILPL2, AGGF1, SRFBP1, FGB, MYH14, TRIP11, DST, GOLGA2
		phosphoprotein	0.00287339	COPS2, TCF7L2, CTNNB1, MYCBP2, APOB, CCDC66, APOA1, CUL7, DDX3X, AGGF1, ANKRD50, DDX24, TRIP11, FN1, GOLGA2, CCDC88C, PCNT, KTN1, DDX5, PCM1, FAM123B, EIF4G2, SRFBP1, SERPIND1, MYH14, DST, SPTAN1
		sulfation	0.00335313	C4A, NID1, SERPIND1, FN1
		disease mutation	0.0038834	SPG7, APOB, APOA1, CUL7, C4A, AGGF1, FGB, SERPIND1, MYH14, CTNNB1, FAM123B, FN1
		cytoskeleton	0.004312	SDCCAG8, PCNT, CALCOCO2, PCM1, TRIP11, DST, SPTAN1, CTNNB1
		cytoplasm	0.0149997	COPS2, SDCCAG8, PAIP1, PCNT, CALCOCO2, PCM1, FAM123B, CTNNB1, RILPL2, AGGF1, DDX3X, SRFBP1, CUL7, TRIP11, DST, SPTAN1
		polymorphism	0.0271623	SDCCAG8, SPG7, CALCOCO2, TCF7L2, MYCBP2, CTNNB1, APOB, CCDC66, APOA1, CUL7, DDX3X, AGGF1, FGB, RNASET2, DDX24, TRIP11, GOLGA2, FN1, C4A, CCDC88C, PCNT, KTN1, NID1, DDX5, PCM1, FAM123B, EIF4G2, TNFRSF10B, MYH14, SERPIND1, DST, SPTAN1
		wnt signaling pathway	0.0291317	CCDC88C, TCF7L2, CTNNB1, FAM123B
		isopeptide bond	0.0445959	CUL7, KTN1, DST, TCF7L2, FN1
Comparison Set	Category	Term	Benjamini	Genes
DENV (Khadka et al) Unique	Keywords	phosphoprotein	1.38079e-07	CGNL1, EID1, SEC31A, WWC1, VPS37A, CNOT1, AKAP9, BMS1, HOOK1, TTC1, NUMA1, FGA, GOLSYN, KRT8, NUP50, PSMD1, CAT, SFRS11, FYB, FUNDC2, KNG1, COBLL1, SCLT1, CEP135, TP53BP2, PTBP1, FUNDC1, AKAP8L, RAI14, DCTN1, TAX1BP1, DCTN2, STAT2, SYNE1, SYNE2, KIF1B, UACA, PRDX6, SPTBN2, PIAS1, PDCD6IP, PGK1, KPNA3, AKAP1, ERC1, MATR3, GOLGB1
		coiled coil	1.78613e-07	CGNL1, WWC1, AKAP9, HOOK1, NUMA1, FGA, GOLSYN, KRT8, COL12A1, LAMB1, FYB, SCLT1, CEP135, RAI14, TAX1BP1, DCTN1, EMILIN1, DCTN2, SYNE1, UACA, KIF1B, SYNE2, ERC1, LOC728047, GOLGB1
		cytoplasm	2.18707e-05	EID1, SEC31A, WWC1, AKAP9, CALR, HOOK1, GOLSYN, KRT8, AKR7A3, FYB, SCLT1, CEP135, TP53BP2, AKAP8L, RAI14, DCTN1, STAT2, DCTN2, SYNE1, SYNE2, UACA, KIF1B, PRDX6, SPTBN2, PDCD6IP, PGK1, ERC1, KPNA3
		cytoskeleton	2.55401e-05	CEP135, RAI14, AKAP9, DCTN1, DCTN2, HOOK1, SYNE1, UACA, KIF1B, SYNE2, GOLSYN, SPTBN2, PDCD6IP
		acetylation	0.000209268	FYB, PTBP1, AKAP8L, DSCR3, UBE2I, CALR, PECI, DCTN1, DCTN2, STAT2, HOOK1, NUMA1, ZBTB8OS, SYNE2, UACA, PRDX6, KRT8, NUP50, PSMD1, PDCD6IP, PGK1, KPNA3, MATR3
	GO Cellular Compartment	GO:0005856~cytoskeleton	0.00452278	FYB, CGNL1, CEP135, RAI14, AKAP9, DCTN1, DCTN2, HOOK1, SYNE1, NUMA1, SYNE2, UACA, KIF1B, GOLSYN, KRT8, SPTBN2, PDCD6IP
		GO:0043228~non-membrane-bounded organelle	0.0178667	FYB, CGNL1, CEP135, PTBP1, AKAP8L, RAI14, AKAP9, UBE2I, BMS1, DCTN1, DCTN2, HOOK1, SYNE1, NUMA1, SYNE2, KIF1B, UACA, GOLSYN, KRT8, SPTBN2, PDCD6IP, SFRS11
		GO:0043232~intracellular non-membrane-bounded organelle	0.0178667	FYB, CGNL1, CEP135, PTBP1, AKAP8L, RAI14, AKAP9, UBE2I, BMS1, DCTN1, DCTN2, HOOK1, SYNE1, NUMA1, SYNE2, KIF1B, UACA, GOLSYN, KRT8, SPTBN2, PDCD6IP, SFRS11

## Sheet: SI Table 6B
SI Table 6B. DAVID enrichment analysis of all cellular targets of HCV Genotype 2a (Dolan et al) and DENV (Khadka et al). (Corresponds to Fig. 7B)
Group	Category	Term	Benjamini	Genes
All DENV (Khadka et al)	BLOCKS	IPB002017:Spectrin repeat	0.0127802	SYNE1, SPTBN2, DST, SPTAN1
		IPB001589:Actin-binding, actinin-type	0.0127802	SYNE1, SYNE2, SPTBN2, DST
	COG NAME	COG1196: Smc; Chromosome segregation ATPases	0.00168116	SDCCAG8, SYNE1, UACA, CCDC88C, TRIP11, DST, GOLGB1
		COG0419: SbcC; ATPase involved in DNA repair	0.00287858	APOB, SYNE1, LAMB1, DST
	COG ONTOLOGY	Cell division and chromosome partitioning	0.0023814	SDCCAG8, SYNE1, UACA, CCDC88C, TRIP11, DST, GOLGB1
	GO Biological Process	GO:0007017~microtubule-based process	0.00923065	HOOK1, SPG7, KIF1B, CEP135, PCNT, KTN1, PCM1, DST, CTNNB1, DCTN2
		GO:0007049~cell cycle	0.0346844	EID1, CEP135, TP53BP2, PCNT, UBE2I, CALR, TCF7L2, DCTN1, DCTN2, CTNNB1, EIF4G2, NUMA1, PSMD1, PDCD6IP, DST
		GO:0000226~microtubule cytoskeleton organization	0.0468966	HOOK1, CEP135, PCNT, PCM1, DST, CTNNB1, DCTN2
	GO Cellular Compartment	GO:0005856~cytoskeleton	4.59294e-05	CGNL1, SDCCAG8, CALCOCO2, AKAP9, CTNNB1, MYCBP2, HOOK1, NUMA1, GOLSYN, KRT8, TRIP11, FYB, CEP135, PCNT, RAI14, PCM1, DCTN1, DCTN2, SYNE1, SYNE2, KIF1B, UACA, SPTBN2, PDCD6IP, MYH14, DST, SPTAN1
		GO:0043228~non-membrane-bounded organelle	0.000887538	CGNL1, COPS2, SDCCAG8, CALCOCO2, AKAP9, BMS1, MYCBP2, CTNNB1, HOOK1, NUMA1, GOLSYN, KRT8, DDX24, TRIP11, SFRS11, FYB, CEP135, PCNT, PTBP1, AKAP8L, RAI14, UBE2I, DDX5, PCM1, DCTN1, DCTN2, SYNE1, SYNE2, UACA, KIF1B, SPTBN2, MYH14, PDCD6IP, DST, SPTAN1
		GO:0043232~intracellular non-membrane-bounded organelle	0.000887538	CGNL1, COPS2, SDCCAG8, CALCOCO2, AKAP9, BMS1, MYCBP2, CTNNB1, HOOK1, NUMA1, GOLSYN, KRT8, DDX24, TRIP11, SFRS11, FYB, CEP135, PCNT, PTBP1, AKAP8L, RAI14, UBE2I, DDX5, PCM1, DCTN1, DCTN2, SYNE1, SYNE2, UACA, KIF1B, SPTBN2, MYH14, PDCD6IP, DST, SPTAN1
		GO:0015630~microtubule cytoskeleton	0.00312116	SDCCAG8, CEP135, PCNT, AKAP9, PCM1, DCTN1, DCTN2, MYCBP2, CTNNB1, HOOK1, NUMA1, KIF1B, PDCD6IP, DST
		GO:0044430~cytoskeletal part	0.0164284	CGNL1, SDCCAG8, CEP135, PCNT, AKAP9, PCM1, DCTN1, DCTN2, CTNNB1, HOOK1, NUMA1, KIF1B, KRT8, SPTBN2, MYH14, PDCD6IP, SPTAN1
		GO:0005813~centrosome	0.0219684	SDCCAG8, CEP135, PCNT, AKAP9, PDCD6IP, PCM1, CTNNB1, DCTN2
		GO:0005829~cytosol	0.025579	SDCCAG8, CEP135, PCNT, AKAP9, PCM1, CALR, TCF7L2, DCTN1, CTNNB1, DCTN2, NUMA1, RILPL2, UACA, PRDX6, SPTBN2, AKR7A3, PDCD6IP, CAT, ERC1, SPTAN1
		GO:0005577~fibrinogen complex	0.0286194	FGA, FGB, FN1
		GO:0005815~microtubule organizing center	0.0335438	SDCCAG8, CEP135, PCNT, AKAP9, PDCD6IP, PCM1, CTNNB1, DCTN2
	GO Molecular Function	GO:0019899~enzyme binding	0.031298	EID1, APOB, APOA1, CUL7, AKAP8L, UBE2I, PIAS1, ERC1, LAMB1, AKAP1, TCF7L2, CTNNB1
	INTERPRO	IPR002017:Spectrin repeat	0.00081905	SYNE1, SYNE2, SPTBN2, DST, SPTAN1
		IPR018159:Spectrin/alpha-actinin	0.00207059	SYNE1, SYNE2, SPTBN2, DST, SPTAN1
		IPR001589:Actinin-type, actin-binding, conserved site	0.0163604	SYNE1, SYNE2, SPTBN2, DST
	KEGG PATHWAY	hsa04610:Complement and coagulation cascades	0.0385388	KNG1, FGA, C4A, FGB, SERPIND1
	PANTHER BP ALL	BP00137:Protein targeting and localization	0.0122849	COPS2, PCNT, AKAP8L, AKAP9, AKAP1, KPNA3, LOC728047, GOLGA2
	PANTHER FAMILY	PTHR11915~SPECTRIN-LIKE CELL STRUCTURE PROTEIN	0.00917593	SYNE1, SYNE2, SPTBN2, DST, SPTAN1
	PFAM	PF00435:Spectrin	0.000990753	SYNE1, SYNE2, SPTBN2, DST, SPTAN1
	PROSITE	PS00020:Actinin-type actin-binding domain signature 2.	0.0301824	SYNE1, SYNE2, SPTBN2, DST
		PS00020:ACTININ 2	0.0301824	SYNE1, SYNE2, SPTBN2, DST
		PS00019:ACTININ 1	0.0301824	SYNE1, SYNE2, SPTBN2, DST
		PS00019:Actinin-type actin-binding domain signature 1.	0.0301824	SYNE1, SYNE2, SPTBN2, DST
	REACTOME PATHWAY	REACT 152:Cell Cycle, Mitotic	0.0369027	SDCCAG8, NUMA1, CEP135, PCNT, PSMD1, AKAP9, PCM1, DCTN1, DCTN2
	SMART	SM00150:SPEC	0.00224814	SYNE1, SYNE2, SPTBN2, DST, SPTAN1
	SP PIR KEYWORDS	coiled coil	1.17928e-12	CGNL1, SDCCAG8, WWC1, CALCOCO2, AKAP9, HOOK1, NUMA1, CCDC66, RILPL2, FGA, GOLSYN, AGGF1, FGB, KRT8, COL12A1, LAMB1, TRIP11, GOLGA2, FYB, SCLT1, CEP135, CCDC88C, PCNT, KTN1, RAI14, PCM1, TRIM62, TAX1BP1, DCTN1, DCTN2, EMILIN1, SYNE1, SYNE2, UACA, KIF1B, SRFBP1, MYH14, ERC1, LOC728047, DST, GOLGB1
		phosphoprotein	1.57572e-11	COPS2, SEC31A, VPS37A, WWC1, CNOT1, CTNNB1, HOOK1, APOB, APOA1, CUL7, ANKRD50, PSMD1, DDX24, CAT, GOLGA2, KNG1, FUNDC2, CCDC88C, PTBP1, FUNDC1, RAI14, KTN1, PCM1, DCTN1, FAM123B, DCTN2, EIF4G2, KIF1B, PRDX6, PDCD6IP, PIAS1, KPNA3, AKAP1, ERC1, DST, MATR3, CGNL1, EID1, AKAP9, BMS1, TCF7L2, MYCBP2, TTC1, NUMA1, CCDC66, AGGF1, GOLSYN, DDX3X, FGA, KRT8, NUP50, TRIP11, SFRS11, FN1, FYB, COBLL1, SCLT1,…
		cytoskeleton	4.19248e-09	SDCCAG8, CEP135, PCNT, RAI14, CALCOCO2, AKAP9, PCM1, DCTN1, CTNNB1, DCTN2, HOOK1, SYNE1, SYNE2, KIF1B, UACA, GOLSYN, SPTBN2, PDCD6IP, TRIP11, DST, SPTAN1
		cytoplasm	4.31806e-08	COPS2, EID1, SDCCAG8, SEC31A, WWC1, CALCOCO2, AKAP9, CALR, CTNNB1, HOOK1, RILPL2, CUL7, DDX3X, GOLSYN, AGGF1, KRT8, AKR7A3, TRIP11, FYB, SCLT1, CEP135, TP53BP2, PAIP1, PCNT, AKAP8L, RAI14, PCM1, DCTN1, DCTN2, STAT2, FAM123B, SYNE1, SYNE2, UACA, KIF1B, SRFBP1, PRDX6, SPTBN2, PDCD6IP, PGK1, KPNA3, ERC1, DST, SPTAN1
		plasma	1.09526e-06	GC, KNG1, APOB, APOA1, FGA, C4A, FGB, SERPIND1, FN1
		acetylation	4.73174e-05	DSCR3, CALR, MYCBP2, HOOK1, NUMA1, APOB, ZBTB8OS, DDX3X, AGGF1, NUP50, KRT8, PSMD1, DDX24, FYB, PTBP1, AKAP8L, UBE2I, DDX5, PCM1, PECI, DCTN1, DCTN2, STAT2, EIF4G2, SYNE2, UACA, PRDX6, MYH14, PDCD6IP, PGK1, KPNA3, MATR3, SPTAN1
		alternative splicing	0.00618192	COPS2, SPG7, SEC31A, VPS37A, WWC1, CNOT1, CTNNB1, PSMD1, COL12A1, GOLGA2, KNG1, CCDC88C, PTBP1, KTN1, RAI14, PCM1, PECI, ZNF688, DCTN1, FAM123B, EIF4G2, KIF1B, TNFRSF10B, AKAP1, ERC1, DST, DCUN1D4, GC, EID1, CGNL1, SDCCAG8, AKAP9, TCF7L2, ALDH3A2, MYCBP2, ZBTB8OS, NUMA1, CCDC66, AGGF1, GOLSYN, FGA, RNASET2, FN1, FYB, COBLL1, SCLT1, CEP135, TP53BP2, PAIP1, NID1, TAX1BP1, STAT2, SYNE1, SYNE2, SPTBN…
		liver	0.00655027	GC, APOB, APOA1, FGA, FGB
		disease mutation	0.0256604	SPG7, C4A, AKAP9, ALDH3A2, CTNNB1, FAM123B, APOB, KIF1B, APOA1, CUL7, AGGF1, FGA, FGB, KRT8, SPTBN2, SERPIND1, MYH14, PGK1, FN1
		sulfation	0.0284833	C4A, NID1, SERPIND1, FN1
		extracellular matrix	0.0296718	COL12A1, NID1, LAMB1, CALR, DST, EMILIN1, FN1
		actin-binding	0.0307974	GC, SYNE1, SYNE2, SPTBN2, MYH14, DST, SPTAN1
		blood coagulation	0.0324746	KNG1, FGA, FGB, SERPIND1
Group	Category	Term	Benjamini	Genes
All HCV GT 2a (Dolan et al)	BLOCKS	IPB002017:Spectrin repeat	0.0171891	SESTD1, UTRN, DST, SPTAN1
	COG NAME	COG1196: Smc; Chromosome segregation ATPases	0.0131469	SDCCAG8, CCDC88C, UTRN, ITSN2, TRIP11, DST
	COG ONTOLOGY	Cell division and chromosome partitioning	0.00146117	SDCCAG8, CCDC88C, UTRN, ITSN2, TRIP11, DST, PIK3R1
	GOTERM CC FAT	GO:0034385~triglyceride-rich lipoprotein particle	0.00126848	APOB, APOA1, APOE, APOA5, APOH
		GO:0034361~very-low-density lipoprotein particle	0.00126848	APOB, APOA1, APOE, APOA5, APOH
		GO:0032994~protein-lipid complex	0.00426461	APOB, APOA1, APOE, APOA5, APOH
		GO:0034358~plasma lipoprotein particle	0.00426461	APOB, APOA1, APOE, APOA5, APOH
		GO:0042627~chylomicron	0.00520361	APOB, APOE, APOA5, APOH
		GO:0005815~microtubule organizing center	0.00756307	SDCCAG8, ROCK1, PCNT, SLMAP, NPM1, PCM1, CEP63, IFT88, CTNNB1
		GO:0034364~high-density lipoprotein particle	0.0170536	APOA1, APOE, APOA5, APOH
		GO:0005813~centrosome	0.0175238	SDCCAG8, ROCK1, PCNT, SLMAP, NPM1, PCM1, CEP63, CTNNB1
		GO:0005615~extracellular space	0.0231547	TF, C4A, C3, NUCB1, APOB, LOC100133511, APOA1, APOE, FGB, NUCB2, APOA5, CFH, APOH, FN1
		GO:0015630~microtubule cytoskeleton	0.0389241	SDCCAG8, ROCK1, PCNT, SLMAP, NPM1, PCM1, CEP63, DST, IFT88, CTNNB1, MYCBP2
		GO:0044421~extracellular region part	0.0420598	TF, C4A, C3, NID1, NUCB1, APOB, APOA1, LOC100133511, APOE, FGB, APOA5, NUCB2, CFH, APOH, DST, FN1
		GO:0005793~ER-Golgi intermediate compartment	0.0437247	NUCB1, NUCB2, PDIA6, FN1
		GO:0005856~cytoskeleton	0.0481792	SDCCAG8, ROCK1, PCNT, UTRN, IQGAP2, CALCOCO2, CEP63, PCM1, TPM4, CTNNB1, MYCBP2, SLMAP, NPM1, MYH14, TRIP11, IFT88, DST, SPTAN1
		GO:0016607~nuclear speck	0.0487488	DDX3X, NPM1, GATAD2A, WBP11, ZNF638
	GOTERM MF FAT	GO:0008201~heparin binding	0.00446382	APOB, APOE, APOA5, APOH, HRG, SERPIND1, FN1
		GO:0070325~lipoprotein receptor binding	0.00776142	APOB, APOA1, APOE, APOA5
		GO:0005539~glycosaminoglycan binding	0.00833474	APOB, APOE, APOA5, APOH, HRG, SERPIND1, FN1
		GO:0030247~polysaccharide binding	0.0105324	APOB, APOE, APOA5, APOH, HRG, SERPIND1, FN1
		GO:0001871~pattern binding	0.0105324	APOB, APOE, APOA5, APOH, HRG, SERPIND1, FN1
		GO:0005543~phospholipid binding	0.0177943	APOB, APOA1, SNX14, APOE, APOA5, APOH, PIK3R1
	INTERPRO	IPR013326:Apolipoprotein/apolipophorin	0.031922	APOA1, APOE, APOA5
		IPR000074:Apolipoprotein A1/A4/E	0.031922	APOA1, APOE, APOA5
	PANTHER FAMILY	PTHR18976~APOLIPOPROTEIN	0.0109932	APOA1, APOE, APOA5
	PANTHER MF ALL	MF00088:Apolipoprotein	0.000517081	APOB, APOA1, APOE, APOA5, APOH
	PFAM	PF01442:Apolipoprotein A1/A4/E domain	0.0356049	APOA1, APOE, APOA5
		PF01442:Apolipoprotein	0.0356049	APOA1, APOE, APOA5
	SP PIR KEYWORDS	plasma	4.37736e-09	TF, APOB, LOC100133511, APOA1, C4A, C3, APOE, FGB, MST1, APOH, SERPIND1, FN1
		phosphoprotein	1.17923e-07	COPS2, TSG101, COPS3, UTRN, PDIA6, IQGAP2, ZNF638, ITSN2, CBX5, CTNNB1, N4BP2L2, APOB, APOA1, CUL7, APOE, SLMAP, ANKRD50, DDX24, APOA5, RBM10, GOLGA2, GATM, ROCK1, CCDC88C, KTN1, OPTN, PCM1, FAM123B, NUCB1, EIF4G2, NUCB2, DST, TF, C3, WBP11, CIC, TCF7L2, TPM4, MYCBP2, ATXN2L, LOC100133511, CCDC66, AGGF1, DDX3X, GORASP2, NPM1, GATAD2A, TRIP11, HSPA8, PIK3R1, FN1, PCNT, ELAVL1, DDX5, EHMT2, RLF, MP…
		coiled coil	4.22424e-07	SDCCAG8, STX8, TSG101, CALCOCO2, WBP11, ITSN2, TPM4, N4BP2L2, CCDC66, RILPL2, AGGF1, FGB, SLMAP, APOA5, GATAD2A, TRIP11, GOLGA2, ROCK1, CCDC88C, PCNT, KTN1, OPTN, CEP63, PCM1, TRIM62, NUCB1, MPHOSPH9, SRFBP1, MYH14, SMC1A, DST
		polymorphism	0.000203679	SPG7, TSG101, GREB1, HMGCR, GPR81, UTRN, IQGAP2, PDIA6, ZNF638, ITSN2, CTNNB1, N4BP2L2, APOB, APOA1, CUL7, APOE, APOA5, DDX24, APOH, CFH, RBM10, GOLGA2, ROCK1, GATM, C4A, CCDC88C, KTN1, OPTN, PCM1, FAM123B, NUCB1, EIF4G2, TNFRSF10B, NUCB2, DST, IFT88, GATC, TF, SDCCAG8, GLRX5, C3, MST1, CALCOCO2, CIC, TCF7L2, TPM4, MYCBP2, LOC100133511, CCDC66, DDX3X, AGGF1, FGB, GORASP2, RNASET2, GATAD2A, EIF3L,…
		heparin-binding	0.000515749	APOB, APOE, APOH, HRG, SERPIND1, FN1
		cytoplasm	0.00051589	COPS2, SDCCAG8, TSG101, COPS3, UTRN, CALCOCO2, WBP11, ITSN2, TPM4, CTNNB1, RILPL2, CUL7, DDX3X, AGGF1, SLMAP, EIF3L, TRIP11, HSPA8, GATM, ROCK1, PAIP1, PCNT, ELAVL1, OPTN, CEP63, PCM1, FAM123B, NUCB1, SRFBP1, NUCB2, SCP2, DST, SPTAN1, ADAR
		chylomicron	0.000519037	APOB, APOE, APOA5, APOH
		vldl	0.000603444	APOB, APOE, APOA5, APOH
		cytoskeleton	0.000987241	SDCCAG8, ROCK1, PCNT, UTRN, CALCOCO2, CEP63, PCM1, TPM4, CTNNB1, SLMAP, DST, TRIP11, SPTAN1
		disease mutation	0.00106098	TF, SPG7, C4A, C3, OPTN, CTNNB1, FAM123B, APOB, APOA1, LOC100133511, CUL7, AGGF1, APOE, FGB, APOA5, CFH, SERPIND1, MYH14, SMC1A, PIK3R1, ADAR, FN1
		acetylation	0.00114467	TSG101, COPS3, IQGAP2, WBP11, TPM4, MYCBP2, APOB, ATXN2L, DDX3X, AGGF1, SLMAP, NPM1, DDX24, EIF3L, RBM10, PIK3R1, HSPA8, ROCK1, GATM, EHMT2, DDX5, PCM1, EIF4G2, ZNF195, MYH14, SMC1A, SCP2, SPTAN1
		lipid binding	0.00146117	APOB, APOA1, APOE, APOH
		hdl	0.00146117	APOA1, APOE, APOA5, APOH
		lipid transport	0.0035984	APOB, APOA1, APOE, APOA5, SCP2
		alternative splicing	0.00504498	COPS2, SPG7, GREB1, TSG101, HMGCR, PDIA6, IQGAP2, ZNF638, ITSN2, CTNNB1, N4BP2L2, SLMAP, CFH, RBM10, GOLGA2, GATM, CCDC88C, KTN1, OPTN, PCM1, FAM123B, EIF4G2, TNFRSF10B, ZNF195, NUCB2, IFT88, DST, SDCCAG8, SNX14, TCF7L2, TPM4, MYCBP2, ATXN2L, CCDC66, AGGF1, RNASET2, GORASP2, NPM1, GATAD2A, FBXO3, PIK3R1, HSPA8, FN1, PAIP1, NID1, EHMT2, CEP63, MPHOSPH9, PHF14, MYH14, SCP2, SPTAN1, ADAR
		isopeptide bond	0.010927	CUL7, SNX14, NPM1, KTN1, DST, TCF7L2, FN1, ADAR
		atherosclerosis	0.0114293	APOB, APOA1, APOE
		sulfation	0.017308	C4A, NID1, SERPIND1, FN1
		ubl conjugation	0.0225292	CUL7, SNX14, TSG101, NPM1, KTN1, DST, TCF7L2, PIK3R1, CTNNB1, ADAR

[truncated: 1 more sheets: SI Table 6C]
